# Supplementary material for: The construction of phosphonate triazolyl by copper(ii)-catalyzed furan dearomatized [3 + 2] cycloaddition
Source: Royal Society of Chemistry journal article supplement (doi:10.1039/d2ob01060g), 2022-01-01

## The Construction of Phosphonate Triazoles Using Furan Dearomatized Cycloaddition

Wahab Abdul,<sup>a</sup> Ziwei Gao,<sup>a</sup> Jing Gou,<sup>b</sup> and Binxun Yu\*,<sup>a, c</sup>

<sup>a</sup>Key Laboratory of Applied Surface and Colloid Chemistry, Ministry of Education, School of Chemistry & Chemical Engineering, Shaanxi Normal University, Xi'an 710062, China

<sup>b</sup>Shaanxi Key Laboratory for Advanced Energy Devices, Shaanxi Normal University, Xi'an 710062, China

<sup>c</sup>SCNU Qingyuan Institute of Science and Technology Innovation Co., Ltd., Qingyuan 511517, China

E-mail: [yubx@snnu.edu.cn](mailto:yubx@snnu.edu.cn)

### Table of Contents

|                                                                                                                     |    |
|---------------------------------------------------------------------------------------------------------------------|----|
| I. General information.....                                                                                         | 2  |
| II. General procedure for Cu-catalyzed [3+2] cycloaddition of furfuryl phosphonate alcohols and organo azides ..... | 2  |
| III. Typical preparation of furfuryl phosphonate alcohol substrates.....                                            | 3  |
| IV. Preparation of (3a) by multi-components reaction .....                                                          | 3  |
| V. Gram-scale reaction .....                                                                                        | 3  |
| VI. Spectroscopic data of products and substrates.....                                                              | 4  |
| VII. Copies of <sup>1</sup> H, <sup>13</sup> C and <sup>31</sup> P NMR Spectra for products and substrates .....    | 18 |

## I. General information

Dichloromethane was refluxed with CaH<sub>2</sub> and freshly distilled prior to use. THF was refluxed with Na and freshly distilled prior to use. 1,1,1,3,3,3-Hexafluoro-2-propanol (HFIP) was purchased from Aladdin Chemicals. All reactions under standard conditions were monitored by thin-layer chromatography (TLC) on gel F254 plates. The silica gel (200-300 meshes) was used for column chromatography, and the distillation range of petroleum ether was 60-90°C. High-resolution mass spectra (HRMS) were obtained on a Bruker MAXIS and are reported as *m/z* (relative intensity). Accurate masses are reported for the molecular ion [M+Na]<sup>+</sup> or [M+H]<sup>+</sup>. <sup>1</sup>H and <sup>13</sup>C NMR spectra were recorded on *Bruker AM-600 MHz*, *Bruker AM-400 MHz* and *JEOL JNM-ECZ-400 MHz* instruments, and spectral data were reported in *ppm* relative to tetramethylsilane (TMS) as internal standard. Data for <sup>1</sup>H NMR are reported as follows: chemical shift ( $\delta$  ppm), multiplicity (s = singlet, d = doublet, t = triplet, q = quartet, p = quintet, m = multiplet, dd = doublet of doublets, dt = doublet of triplets etc, br = broad), coupling constant (Hz) and integration. All <sup>13</sup>C NMR and <sup>31</sup>P NMR spectra are reported in ppm.

## II. General procedure for Cu-catalyzed [3+2] cycloaddition of furfuryl phosphonate alcohols and organo azides

A sealed tube (25 mL) equipped with a stirring bar was loaded with furfuryl phosphonate alcohols (0.2 mmol, 1.0 equiv), organo azides (0.2 mmol, 1.0 equiv) and CuCl<sub>2</sub> (0.01 mmol, 5 mmol%) in HFIP (2 mL), the mixture was stirred at 80°C for 1h under a nitrogen atmosphere. After the completion of reaction, the mixture was quenched with water and extracted three times with dichloromethane (25 mL). The organic layer was dried with Na<sub>2</sub>SO<sub>4</sub> and concentrated under vacuum. The oily crude product was purified by silica gel with petroleum ether/ethyl acetate as eluent to give the corresponding phosphonates triazoles in noted yields.

### III. Typical preparation of furfuryl phosphonate alcohol substrates

To a round bottom flask (25 mL) equipped with a stirring bar was loaded with 5-methyl furfuraldehyde (0.91 mmol, 1.0 equiv) and alkyl phosphonates (1.09 mmol, 1.2 equiv), and then was added triethylamine (0.045 mmol, 0.05 equiv) dropwise. The resulted mixture was stirred at room temperature for 8h. After the completion of reaction via TLC detection, the mixture was quenched with 0.1 N HCl and extracted three times with dichloromethene (25ml). The organic layer was dried with Na<sub>2</sub>SO<sub>4</sub> and concentrated under vacuum. The oily crude product was purified by silica gel with petroleum ether/ethyl acetate as eluent to give the corresponding furfuryl phosphonate alcohols in noted yields.

### IV. Preparation of (3a) by multi-components reaction

A sealed tube (25 mL) equipped with a stirring bar was loaded with 5-methyl furfuryldehyde (0.2 mmol, 1.0 equiv), alkyl phosphonates (1.2 equiv) and triethylamine (0.1 equiv). The mixture was stirred at room temperature for 6h under a nitrogen atmosphere. After that, a solution of benzyl azide **2a** (1.0 equiv) and CuCl<sub>2</sub> (0.05 equiv) in HFIP (5 mL) was added and the mixture was stirred at 80°C for 1h. After the completion of reaction via TLC detection, the mixture was quenched with water and extracted three times with dichloromethene (25 mL). The organic layer was dried over Na<sub>2</sub>SO<sub>4</sub> and concentrated under vacuum. The oily crude product was purified by silica gel with petroleum ether/ethyl acetate as eluent to give the corresponding phosphonate triazole **3a** in 71% yields.

### V. Gram-scale reaction

A sealed tube (100 mL) equipped with a stirring bar was loaded with furfuryl phosphonate alcohols **1a** (1 g, 4.05 mmol, 1.0 equiv), benzyl azide **2a** (0.54 g, 4.05 mmol, 1.0 equiv) and CuCl<sub>2</sub> (27 mg, 0.2 mmol, 5 mmol%) in HFIP (15 mL), the mixture was stirred at 80°C for 1h

under a nitrogen atmosphere. After the completion of reaction, the mixture was quenched with water and extracted three times with dichloromethane (75 mL). The organic layer was dried with Na<sub>2</sub>SO<sub>4</sub> and concentrated under vacuum. The oily crude product was purified by silica gel with petroleum ether/ethyl acetate as eluent to give the phosphonate triazole **3a** (1.28 g, 3.52 mmol) in 87% yield.

## VI. Spectroscopic data of products and substrates

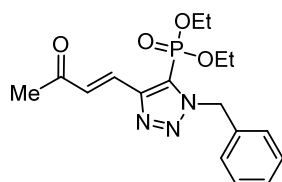

### Diethyl(E)-(1-benzyl-4-(3-oxobut-1-en-1-yl)-1H-1,2,3-triazol-5-yl)phosphonate

**(3a)** Isolated by column chromatography over silica gel (eluent, 2:1 petroleum ether/ethyl acetate) to afford **3a** as a yellow oil (62 mg, 86% yield), 0.2 mmol 5-methylfurfurylphosphonate (**1a**) and benzyl azide (**2a**) were used as starting materials. <sup>1</sup>H NMR (400 MHz, CDCl<sub>3</sub>) δ 7.73 (d, *J* = 16.1 Hz, 1H), 7.36 – 7.31 (m, 1H), 7.31 – 7.27 (m, 4H), 5.87 (s, 2H), 4.05 (m, 2H), 3.94 – 3.83 (m, 2H), 2.38 (s, 3H), 1.20 (t, 6H). <sup>13</sup>C NMR (101 MHz, CDCl<sub>3</sub>) δ 197.90, 148.65 (d, *J* = 20.0 Hz), 134.90, 130.23, 129.24, 128.61, 128.40, 127.84, 125.02 (d, *J* = 214.9 Hz), 63.41 (d, *J* = 5.2 Hz), 53.78, 28.14, 15.93 (d, *J* = 6.6 Hz). <sup>31</sup>P NMR (162 MHz, CDCl<sub>3</sub>) δ 3.42. HRMS (ESI-TOF) *m/z*: calcd for C<sub>17</sub>H<sub>22</sub>N<sub>3</sub>O<sub>4</sub>PNa [M+Na]<sup>+</sup> 386.1240; found 386.1240.

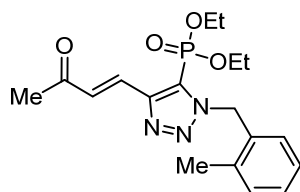

### Diethyl

### (E)-(1-(2-methylbenzyl)-4-(3-oxobut-1-en-1-yl)-1H-1,2,3-triazol-5-yl)phosphonate (**3b**)

Isolated by column chromatography over silica gel (eluent, 2:1 petroleum ether/ethyl acetate) to afford **3b** as a yellow oil (64 mg, 85% yield), 0.2 mmol 5-methylfurfurylphosphonate (**1a**) and 2-methylbenzyl azide (**2b**) were used as starting material. <sup>1</sup>H NMR (400 MHz, CDCl<sub>3</sub>) δ 7.78 (d, *J* = 16.1 Hz, 1H), 7.35 – 7.27 (m, 1H), 7.20 (d, *J* = 4.1 Hz, 2H), 7.10 (m, 1H), 6.73 (d, *J* = 7.6 Hz, 1H), 5.86 (s, 2H), 4.10 – 4.00 (m, 2H), 3.94 – 3.83 (m, 2H), 2.44 (s, 3H), 2.40 (s, 3H), 1.20 (t, 6H). <sup>13</sup>C NMR (101 MHz, CDCl<sub>3</sub>) δ 197.98, 148.61, 135.68, 133.50, 130.43, 130.33, 129.38, 128.18, 126.78, 126.52, 126.21, 124.38, 63.48 (d, *J* = 5.3 Hz), 51.51, 28.14, 19.22, 15.96 (d, *J* = 6.6 Hz). <sup>31</sup>P NMR (162 MHz, CDCl<sub>3</sub>) δ 3.50. HRMS (ESI-TOF) *m/z*: calcd for C<sub>18</sub>H<sub>24</sub>N<sub>3</sub>O<sub>4</sub>PNa [M+Na]<sup>+</sup> 400.1397; found 400.1399.

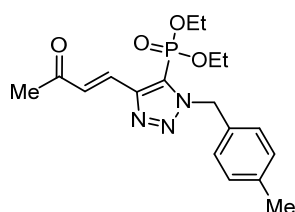

**Diethyl(E)-(1-(4-methylbenzyl)-4-(3-oxobut-1-en-1-yl)-1H-1,2,3-triazol-5-yl)phosphonate (3c)**

Isolated by column chromatography over silica gel (eluent, 2:1 petroleum ether/ethyl acetate) to afford **3c** as a yellow oil (64 mg, 85% yield), 0.2 mmol 5-methylfurfurylphosphonate (**1a**) and 4-methylbenzyl azide (**2c**) were used as starting material. <sup>1</sup>H NMR (400 MHz, CDCl<sub>3</sub>) δ 7.69 (d, *J* = 16.1 Hz, 1H), 7.27 – 7.21 (m, 1H), 7.18 (m, 2H), 7.09 (m, 2H), 5.77 (s, 2H), 4.07 – 3.97 (m, 2H), 3.85 (m, 2H), 2.34 (s, 3H), 2.27 (s, 3H), 1.17 (t, 6H). <sup>13</sup>C NMR (101 MHz, CDCl<sub>3</sub>) δ 197.95, 148.57 (d, *J* = 20.0 Hz) 138.25, 131.85, 130.16, 129.30, 129.21, 127.90, 126.09 – 123.54 (m), 63.40 (d, *J* = 5.2 Hz), 53.59, 28.13, 21.03, 15.93 (d, *J* = 6.6 Hz). <sup>31</sup>P NMR (162 MHz, CDCl<sub>3</sub>) δ 3.51. HRMS (ESI-TOF) *m/z*: calcd for C<sub>18</sub>H<sub>24</sub>N<sub>3</sub>O<sub>4</sub>PNa [M+Na]<sup>+</sup> 400.1397; found 400.1397.

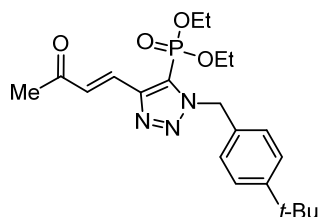

**Diethyl(E)-(1-(4-(tert-butyl)benzyl)-4-(3-oxobut-1-en-1-yl)-1H-1,2,3-triazol-5-yl)phosphonate (3d)**

Isolated by column chromatography over silica gel (eluent, 2:1 petroleum ether/ethyl acetate) to afford **3d** as a yellow oil (68 mg, 81% yield), 0.2 mmol 5-methylfurfurylphosphonate (**1a**) and 4-(tert-butyl)benzyl azide (**2d**) were used as starting material. <sup>1</sup>H NMR (400 MHz, CDCl<sub>3</sub>) δ 7.76 – 7.69 (m, 1H), 7.35 (d, *J* = 8.3 Hz, 2H), 7.28 (t, *J* = 5.5 Hz, 1H), 7.27 – 7.24 (m, 2H), 5.83 (s, 2H), 4.08 – 3.97 (m, 2H), 3.91 – 3.80 (m, 2H), 2.38 (s, 3H), 1.28 (s, 9H), 1.18 (t, 6H). <sup>13</sup>C NMR (101 MHz, CDCl<sub>3</sub>) δ 197.91, 151.56, 148.67 (d, *J* = 20.1 Hz), 131.99, 130.21, 129.33, 127.71, 126.01, 124.70 (d, *J* = 165.6 Hz), 63.36 (d, *J* = 5.1 Hz), 53.60, 34.51, 31.18, 28.16, 15.94 (d, *J* = 6.6 Hz). <sup>31</sup>P (162 MHz, CDCl<sub>3</sub>) δ 3.45. HRMS (ESI-TOF) *m/z*: calcd for C<sub>21</sub>H<sub>30</sub>N<sub>3</sub>O<sub>4</sub>PNa [M+Na]<sup>+</sup> 442.4515; found 442.4576.

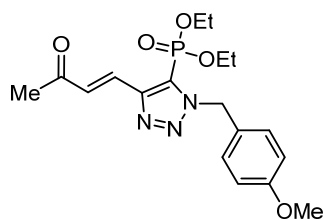

**Diethyl(E)-(1-(4-methoxybenzyl)-4-(3-oxobut-1-en-1-yl)-1H-1,2,3-triazol-5-yl)phosphonate (3e)**

Isolated by column chromatography over silica gel (eluent, 1:1 petroleum ether/ethyl acetate) to afford **3e** as a yellow oil (51 mg, 64% yield), 0.2 mmol 5-methylfurfurylphosphonate (**1a**) and 4-methoxybenzyl azide (**2e**) were used as starting material. <sup>1</sup>H NMR (400 MHz, CDCl<sub>3</sub>) δ 7.73 – 7.67 (m, 1H), 7.34 – 7.21 (m, 3H), 6.89 – 6.80 (m, 2H), 5.79 (s, 2H), 4.14 – 4.04 (m, 2H), 3.98 – 3.88 (m, 2H), 3.78 (s, 3H), 2.38 (s, 2H), 1.23 (t, *J* = 7.1 Hz, 6H). <sup>13</sup>C NMR (101 MHz, CDCl<sub>3</sub>) δ 197.89, 159.62, 148.51 (d, *J* = 20.0 Hz), 130.12, 129.55, 129.25, 126.91, 124.75 (d, *J* = 214.9 Hz), 113.86, 63.45, 55.21, 53.32, 28.14, 15.96 (d, *J* = 6.5 Hz). <sup>31</sup>P (162 MHz, CDCl<sub>3</sub>) δ 3.58. HRMS (ESI-TOF) *m/z*: calcd for C<sub>18</sub>H<sub>24</sub>N<sub>3</sub>O<sub>5</sub>PNa [M+Na]<sup>+</sup> 416.1346; found 416.1348.

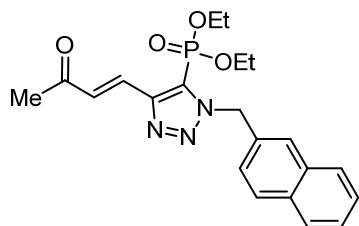

**Diethyl(E)-(1-(naphthalen-1-ylmethyl)-4-(3-oxobut-1-en-1-yl)-1H-1,2,3-triazol-5-yl)phosphonate (3f)**

Isolated by column chromatography over silica gel (eluent, 2:1 petroleum ether/ethyl acetate) to afford **3f** as a yellow oil (60 mg, 73% yield), 0.2 mmol 5-methylfurfurylphosphonate (**1a**) and 1-naphthylmethyl azide (**2f**) were used as starting material.  $^1\text{H NMR}$  (400 MHz,  $\text{CDCl}_3$ )  $\delta$  7.81 (m, 4H), 7.72 (d,  $J = 16.1$  Hz, 1H), 7.52 – 7.43 (m, 3H), 7.30 (d,  $J = 16.1$  Hz, 1H), 6.03 (s, 2H), 4.01 (m, 2H), 3.87 (m, 2H), 2.38 (s, 3H), 1.11 (t, 6H).  $^{13}\text{C NMR}$  (101 MHz,  $\text{CDCl}_3$ )  $\delta$  198.09, 148.73, 138.07, 133.12, 132.39, 130.41, 129.36, 128.72, 128.03, 127.78, 127.50, 126.67, 126.34, 125.85, 125.43, 63.66, 54.17, 28.42, 16.04 (d,  $J = 6.6$  Hz).  $^{31}\text{P}$  (162 MHz,  $\text{CDCl}_3$ )  $\delta$  3.48. **HRMS** (ESI-TOF)  $m/z$ : calcd for  $\text{C}_{21}\text{H}_{24}\text{N}_3\text{O}_4\text{PNa}$   $[\text{M}+\text{Na}]^+$  436.1397; found 436.1398.

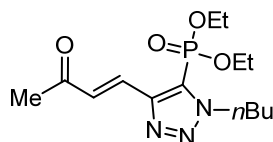

**Diethyl (E)-(1-butyl-4-(3-oxobut-1-en-1-yl)-1H-1,2,3-triazol-5-yl)phosphonate (3g)**

Isolated by column chromatography over silica gel (eluent, 2:1 petroleum ether/ethyl acetate) to afford **3g** as a yellow oil (46 mg, 70% yield), 0.2 mmol 5-methylfurfurylphosphonate (**1a**) and n-butyl azide (**2g**) were used as starting material.  $^1\text{H NMR}$  (400 MHz,  $\text{CDCl}_3$ )  $\delta$  7.78 (d,  $J = 16.1$  Hz, 1H), 7.29 (s, 1H), 4.62 (t, 2H), 4.29 – 4.11 (m, 4H), 2.39 (s, 3H), 1.99 – 1.90 (m, 2H), 1.39 (m, 8H), 0.97 (t, 3H).  $^{13}\text{C NMR}$  (101 MHz,  $\text{CDCl}_3$ )  $\delta$  198.02, 148.27 (d,  $J = 21.0$  Hz), 130.11, 129.48, 123.88 (s), 63.54 (d,  $J = 5.4$  Hz), 50.55, 32.43, 28.11, 19.63, 16.16 (d,  $J = 6.5$  Hz), 13.47.  $^{31}\text{P NMR}$  (162 MHz,  $\text{CDCl}_3$ )  $\delta$  3.95. **HRMS** (ESI-TOF)  $m/z$ : calcd for  $\text{C}_{14}\text{H}_{24}\text{N}_3\text{O}_4\text{PNa}$   $[\text{M}+\text{Na}]^+$  352.1397; found 352.1397.

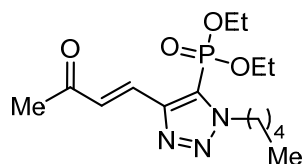

**Diethyl(E)-(4-(3-oxobut-1-en-1-yl)-1-pentyl-1H-1,2,3-triazol-5-yl)phosphonate (3h)**

Isolated by column chromatography over silica gel (eluent, 2:1 petroleum ether/ethyl acetate) to afford **3h** as a yellow oil (53 mg, 77% yield), 0.2 mmol 5-methylfurfurylphosphonate (**1a**) and n-pentyl azide (**1h**) were used as starting material. <sup>1</sup>H NMR (400 MHz, CDCl<sub>3</sub>) δ 7.78 (d, *J* = 16.1 Hz), 7.27 (d, *J* = 15.6 Hz), 4.61 (t, *J* = 7.5 Hz), 4.29 – 4.11 (m), 2.39 (s), 2.02 – 1.91 (m), 1.43 – 1.24 (m), 0.98 – 0.87 (m). <sup>13</sup>C NMR (101 MHz, CDCl<sub>3</sub>) δ 198.01, 148.27 (d, *J* = 20.8 Hz), 130.10, 129.48, 124.96 (d, *J* = 217.0 Hz), 63.53 (d, *J* = 5.5 Hz), 50.79, 30.19, 28.49, 28.11, 22.08, 16.16 (d, *J* = 6.5 Hz), 13.80. <sup>31</sup>P NMR (162 MHz, CDCl<sub>3</sub>) δ 3.95. HRMS (ESI-TOF) *m/z*: calcd for C<sub>15</sub>H<sub>26</sub>N<sub>3</sub>O<sub>4</sub>PNa [M+Na]<sup>+</sup> 366.1553; found 366.1560

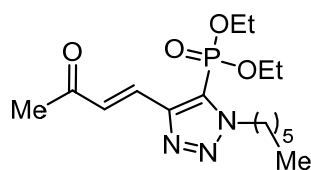

**Diethyl(E)-(1-hexyl-4-(3-oxobut-1-en-1-yl)-1H-1,2,3-triazol-5-yl)phosphonate (3i)**

Isolated by column chromatography over silica gel (eluent, 2:1 petroleum ether/ethyl acetate) to afford **3i** as a yellow oil (57 mg, 80% yield), 0.2 mmol 5-methylfurfurylphosphonate (**1a**) and n-hexyl azide (**2i**) were used as starting material. <sup>1</sup>H NMR (400 MHz, CDCl<sub>3</sub>) δ 7.78 (d, *J* = 16.1 Hz, 1H), 7.27 (d, *J* = 16.5 Hz), 4.61 (t, *J* = 7.3 Hz), 4.28 – 4.12 (m), 2.39 (s), 1.95 (d, *J* = 7.0 Hz), 1.37 (dd, *J* = 17.1, 10.1 Hz), 0.89 (s). <sup>13</sup>C NMR (101 MHz, CDCl<sub>3</sub>) δ 197.86, 148.12 (d, *J* = 20.7 Hz), 129.96, 129.34, 125.89 (s), 63.38 (d, *J* = 5.3 Hz), 58.46, 50.68, 30.65 (d, *J* = 67.5 Hz), 25.93, 22.23, 16.01 (d, *J* = 6.4 Hz), 13.74. <sup>31</sup>P NMR (162 MHz, CDCl<sub>3</sub>) δ 3.06. HRMS (ESI-TOF) *m/z*: calcd for C<sub>15</sub>H<sub>26</sub>N<sub>3</sub>O<sub>4</sub>PNa [M+Na]<sup>+</sup> 380.1710; found 380.1716



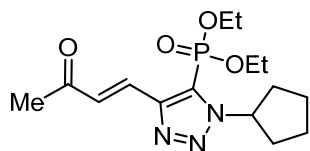

### Diethyl(E)-(1-cyclopentyl-4-(3-oxobut-1-en-1-yl)-1H-1,2,3-triazol-5-yl)phosphonate (**3j**)

Isolated by column chromatography over silica gel (eluent, 2:1 petroleum ether/ethyl acetate) to afford **3j** as a yellow oil (53 mg, 78% yield), 0.2 mmol 5-methylfurfurylphosphonate (**1a**) and cyclopentyl azide (**2j**) were used as starting material. <sup>1</sup>H NMR (400 MHz, CDCl<sub>3</sub>) δ 7.78 (d, *J* = 16.0 Hz, 1H), 7.20 (d, *J* = 16.1 Hz, 1H), 5.31 – 5.24 (m, 1H), 4.24 – 4.07 (m, 4H), 2.33 (s, 3H), 2.18 – 2.11 (m, 4H), 2.02 – 1.94 (m, 2H), 1.74 – 1.67 (m, 2H), 1.32 (t, 6H). <sup>13</sup>C NMR (101 MHz, CDCl<sub>3</sub>) δ 198.13, 148.15 (d, *J* = 21.2 Hz), 130.11, 129.87, 124.95 (d, *J* = 216.2 Hz), 63.45 (d, *J* = 5.3 Hz), 62.11, 33.75, 27.79, 24.66, 16.13 (d, *J* = 6.4 Hz), 16.10. <sup>31</sup>P NMR (162 MHz, CDCl<sub>3</sub>) δ 4.23. HRMS (ESI-TOF) *m/z*: calcd for C<sub>15</sub>H<sub>24</sub>N<sub>3</sub>O<sub>4</sub>PNa [M+Na]<sup>+</sup> 364.1397; found 364.1396.

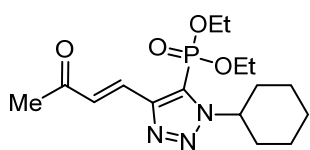

### Diethyl(E)-(1-cyclohexyl-4-(3-oxobut-1-en-1-yl)-1H-1,2,3-triazol-5-yl)phosphonate (**3k**)

Isolated by column chromatography over silica gel (eluent, 2:1 petroleum ether/ethyl acetate) to afford **3k** as a yellow oil (61 mg, 81% yield), 50.2 mmol 5-methylfurfurylphosphonate (**1a**) and cyclohexyl azide (**3k**) were used as starting material. <sup>1</sup>H NMR (400 MHz, CDCl<sub>3</sub>) δ 7.83 (d, *J* = 16.1 Hz, 1H), 7.29 (d, *J* = 1.2 Hz, 1H), 4.83 – 4.74 (m, 1H), 4.21 (m, 4H), 2.39 (s, 3H), 2.12 – 2.05 (m, 4H), 1.96 (m, 2H), 1.76 (m, 1H), 1.50 – 1.41 (m, 2H), 1.38 (t, 7H). <sup>13</sup>C NMR (101 MHz, CDCl<sub>3</sub>) δ 198.17, 147.70, 130.14, 129.86, 124.45, 63.48, 61.35, 60.91, 55.60, 33.39, 32.68, 27.94, 26.62, 25.44, 24.93, 22.30, 16.22, 16.19 (d, *J* = 6.5 Hz). <sup>31</sup>P NMR (162 MHz, CDCl<sub>3</sub>) δ 4.25. HRMS (ESI-TOF) *m/z*: calcd for C<sub>16</sub>H<sub>26</sub>N<sub>3</sub>O<sub>4</sub>PNa [M+Na]<sup>+</sup> 378.1553; found 378.1558.

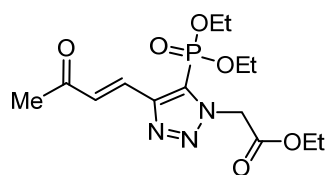

**Diethyl(E)-2-(5-(diethoxyphosphoryl)-4-(3-oxobut-1-en-1-yl)-1H-1,2,3-triazol-1-yl)acetate (3l)**

Isolated by column chromatography over silica gel (eluent, 2:1 petroleum ether/ethyl acetate) to afford **3l** as a yellow oil (47 mg, 66% yield), 0.2 mmol 5-methylfurfurylphosphonate (**1a**) and ethyl azidoacetate (**2l**) were used as starting material. <sup>1</sup>H NMR (400 MHz, CDCl<sub>3</sub>) δ 7.65 (d, *J* = 16.0 Hz, 1H), 7.30 (d, *J* = 15.4 Hz, 1H), 5.47 (s, 2H), 4.31 – 4.19 (m, 4H), 4.17 – 4.06 (m, 2H), 2.40 (s, 3H), 1.34 (m, 9H). <sup>13</sup>C NMR (101 MHz, CDCl<sub>3</sub>) δ 197.75, 149.82 – 146.87 (m), 166.51, 130.35, 128.64, 128.04 – 124.49 (m) 63.80 (d, *J* = 4.9 Hz), 62.36, 51.41, 28.44, 16.09 (d, *J* = 6.6 Hz), 14.02. <sup>31</sup>P NMR (162 MHz, CDCl<sub>3</sub>) δ 3.95 HRMS (ESI-TOF) *m/z*: calcd for C<sub>14</sub>H<sub>22</sub>N<sub>3</sub>O<sub>4</sub>PNa [M+Na]<sup>+</sup> 382.1138; found 382.1139.

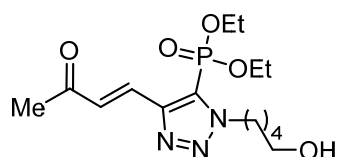

**Diethyl(E)-1-(6-hydroxyhexyl)-4-(3-oxobut-1-en-1-yl)-1H-1,2,3-triazol-5-ylphosphonate (3m)**

Isolated by column chromatography over silica gel (eluent, 1:1 petroleum ether/ethyl acetate) to afford **3m** as a yellow oil (56 mg, 75% yield), 0.2 mmol 5-methylfurfurylphosphonate (**1a**) and 6-hydroxyhexyl azide (**2m**) were used as starting material. <sup>1</sup>H NMR (400 MHz, CDCl<sub>3</sub>) δ 7.75 (d, *J* = 16.0 Hz, 1H), 7.30 – 7.25 (m, 1H), 4.66 – 4.60 (m, 1H), 4.28 – 4.13 (m, 4H), 3.64 (t, 2H), 2.39 (s, 3H), 1.97 (m, 2H), 1.63 – 1.56 (m, 5H), 1.38 (t, 7H). <sup>13</sup>C NMR (101 MHz, CDCl<sub>3</sub>) δ 197.85, 153.81, 129.90, 129.80, 129.14, 122.64, 63.46, 62.32, 50.42, 32.10, 30.17, 28.08, 25.87, 24.81, 16.03, 15.96. <sup>31</sup>P NMR (162 MHz, CDCl<sub>3</sub>) δ 3.53. HRMS (ESI-TOF) *m/z*: calcd for C<sub>16</sub>H<sub>28</sub>N<sub>3</sub>O<sub>5</sub>PNa [M+Na]<sup>+</sup> 396.1659; found 396.1661.

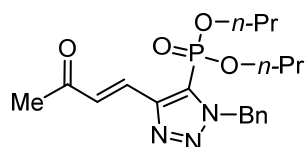

### Dipropyl(E)-(1-benzyl-4-(3-oxobut-1-en-1-yl)-1H-1,2,3-triazol-5-yl)phosphonate (**3n**)

Isolated by column chromatography over silica gel (eluent, 2:1 petroleum ether/ethyl acetate) to afford **3n** as a yellow oil (61 mg, 78% yield), 0.2 mmol **1b** and benzyl azide (**2a**) were used as starting material was used.  $^1\text{H NMR}$  (400 MHz,  $\text{CDCl}_3$ )  $\delta$  7.71 (d,  $J = 16.0$  Hz, 1H), 7.33 – 7.26 (m, 5H), 5.88 (s, 2H), 3.93 (m, 2H), 3.73 (m, 2H), 2.38 (s, 3H), 1.55 (m, 4H), 0.84 (t, 6H).  $^{13}\text{C NMR}$  (101 MHz,  $\text{CDCl}_3$ )  $\delta$  197.82, 148.58 (d,  $J = 19.9$  Hz), 134.99, 130.21, 129.20, 128.62, 128.40, 127.89, 123.97 (s), 68.74 (d,  $J = 5.6$  Hz), 53.77, 28.16, 23.40 (d,  $J = 6.6$  Hz), 9.80.  $^{31}\text{P NMR}$  (162 MHz,  $\text{CDCl}_3$ )  $\delta$  3.44. **HRMS** (ESI-TOF)  $m/z$ : calcd for  $\text{C}_{19}\text{H}_{26}\text{N}_3\text{O}_4\text{PNa}$   $[\text{M}+\text{Na}]^+$  414.1553; found 414.1559.

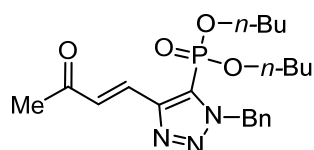

### Dibutyl(E)-(1-benzyl-4-(3-oxobut-1-en-1-yl)-1H-1,2,3-triazol-5-yl)phosphonate (**3o**)

Isolated by column chromatography over silica gel (eluent, 2:1 petroleum ether/ethyl acetate) to afford **3o** as a yellow oil (65 mg, 78% yield), 0.2 mmol **1c** and benzyl azide (**2a**) were used as starting material was used.  $^1\text{H NMR}$  (400 MHz,  $\text{CDCl}_3$ )  $\delta$  7.70 (d,  $J = 16.1$  Hz, 1H), 7.32 – 7.28 (m, 5H), 5.87 (s, 2H), 3.97 (m, 2H), 3.82 – 3.72 (m, 2H), 2.37 (s, 3H), 1.50 (m, 4H), 1.32 – 1.18 (m, 4H), 0.85 (t, 6H).  $^{13}\text{C NMR}$  (101 MHz,  $\text{CDCl}_3$ )  $\delta$  197.86, 148.60 (d,  $J = 19.8$  Hz), 134.99, 130.24, 129.21, 128.63, 128.41, 127.88, 126.33 – 123.67 (m), 67.03 (d,  $J = 5.6$  Hz), 53.77, 31.96 (d,  $J = 6.5$  Hz), 28.14, 18.47, 13.39.  $^{31}\text{P NMR}$  (162 MHz,  $\text{CDCl}_3$ )  $\delta$  3.96. **HRMS** (ESI-TOF)  $m/z$ : calcd for  $\text{C}_{21}\text{H}_{30}\text{N}_3\text{O}_4\text{PNa}$   $[\text{M}+\text{Na}]^+$  442.1866; found 442.1863.

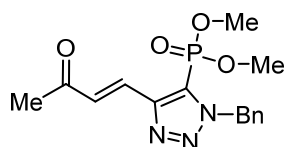

### Dimethyl(E)-(1-benzyl-4-(3-oxobut-1-en-1-yl)-1H-1,2,3-triazol-5-yl)phosphonate(3p)

Isolated by column chromatography over silica gel (eluent, 2:1 petroleum ether/ethyl acetate) to afford **3p** as a yellow oil (54 mg, 81% yield), 0.2 mmol **1d** and benzyl azide (**2a**) were used as starting material was used.  $^1\text{H NMR}$  (400 MHz,  $\text{CDCl}_3$ )  $\delta$  7.67 (d,  $J = 16.0$  Hz, 1H), 7.34 – 7.29 (m, 5H), 5.85 (s, 2H), 3.59 (d, 6H), 2.38 (s, 3H).  $^{13}\text{C NMR}$  (101 MHz,  $\text{CDCl}_3$ )  $\delta$  197.88, 149.55 – 148.70 (m), 134.92, 130.59, 128.86, 128.72, 128.54, 127.92, 125.11 – 122.18 (m), 53.98, 53.28 (d,  $J = 5.3$  Hz), 28.30.  $^{31}\text{P NMR}$  (162 MHz,  $\text{CDCl}_3$ )  $\delta$  3.57. **HRMS** (ESI-TOF)  $m/z$ : calcd for  $\text{C}_{15}\text{H}_{18}\text{N}_3\text{O}_4\text{PNa}$   $[\text{M}+\text{Na}]^+$  358.0927; found 358.0921.

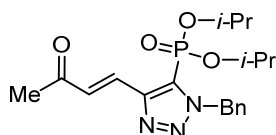

### Diisopropyl(E)-(1-benzyl-4-(3-oxobut-1-en-1-yl)-1H-1,2,3-triazol-5-yl)phosphonate (3q)

Isolated by column chromatography over silica gel (eluent, 2:1 petroleum ether/ethyl acetate) to afford **3q** as a yellow oil (62 mg, 79% yield), 0.2 mmol **1e** and benzyl azide (**2a**) were used as starting material was used.  $^1\text{H NMR}$  (400 MHz,  $\text{CDCl}_3$ )  $\delta$  7.74 (d,  $J = 16.1$  Hz, 1H), 7.33 (m, 5H), 5.89 (s, 2H), 4.60 – 4.50 (m, 2H), 2.38 (s, 3H), 1.31 (m, 6H), 1.05 (m, 6H).  $^{13}\text{C NMR}$  (101 MHz,  $\text{CDCl}_3$ )  $\delta$  197.96, 148.14(m) 139.60, 135.04, 129.95, 129.66, 128.60, 128.38, 128.03, 127.67 – 124.95 (m), 73.08 (d,  $J = 5.5$  Hz), 53.69, 28.06, 23.86 (d,  $J = 4.1$  Hz), 23.36 (d,  $J = 4.9$  Hz).  $^{31}\text{P NMR}$  (162 MHz,  $\text{CDCl}_3$ )  $\delta$  3.98. **HRMS** (ESI-TOF)  $m/z$ : calcd for  $\text{C}_{19}\text{H}_{26}\text{N}_3\text{O}_4\text{PNa}$   $[\text{M}+\text{Na}]^+$  414.1553; found 414.1553.

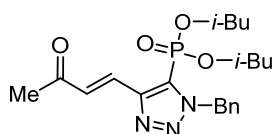

### Diisobutyl(E)-(1-benzyl-4-(3-oxobut-1-en-1-yl)-1H-1,2,3-triazol-5-yl)phosphonate (3r)

Isolated by column chromatography over silica gel (eluent, 2:1 petroleum ether/ethyl acetate) to afford **3r** as a yellow oil (64 mg, 79% yield), 0.2 mmol **1f** and benzyl azide (**2a**) were used as starting material was used. **<sup>1</sup>H NMR** (400 MHz, CDCl<sub>3</sub>) δ 7.68 (d, *J* = 16.1 Hz, 1H), 7.34 – 7.28 (m, 5H), 5.89 (s, 2H), 3.73 (m, 2H), 3.48 (m, 2H), 2.37 (s, 3H), 1.79 (m, 2H), 0.83 (m, 12H). **<sup>13</sup>C NMR** (101 MHz, CDCl<sub>3</sub>) δ 197.81, δ 149.29 – 147.95 (m), 135.08, 130.20, 129.15, 128.68, 128.46, 127.98, 126.85 – 122.67 (m) 72.96, 53.79, 28.84 (d, *J* = 6.8 Hz), 28.23, 18.46 (s). **<sup>31</sup>P NMR** (162 MHz, CDCl<sub>3</sub>) δ 3.46. **HRMS** (ESI-TOF) *m/z*: calcd for C<sub>21</sub>H<sub>30</sub>N<sub>3</sub>O<sub>4</sub>PNa [M+Na]<sup>+</sup> 442.1866; found 442.1870.

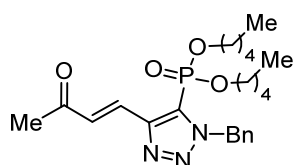

#### Dipentyl(E)-(1-benzyl-4-(3-oxobut-1-en-1-yl)-1H-1,2,3-triazol-5-yl)phosphonate (**3s**)

Isolated by column chromatography over silica gel (eluent, 2:1 petroleum ether/ethyl acetate) to afford **3s** as a yellow oil (69 mg, 87% yield), 0.2 mmol **1g** and benzyl azide (**2a**) were used as starting material was used. **<sup>1</sup>H NMR** (400 MHz, CDCl<sub>3</sub>) δ δ 7.69 – 7.61 (m, 1H), 7.34 – 7.26 (m, 5H), 5.84 (s, 2H), 3.92 (m, 2H), 3.79 – 3.66 (m, 2H), 2.35 (s, 3H), 1.54 – 1.45 (m, 4H), 1.36 – 1.29 (m, 2H), 1.26 – 1.10 (m, 9H), 0.83 (t, 6H). **<sup>13</sup>C NMR** (101 MHz, CDCl<sub>3</sub>) δ 197.84, 148.87 – 148.30 (m), 136.12, 131.90, 130.27, 129.25, 128.66, 128.44, 127.93, 126.23 – 123.50 (m), 67.20 (d, *J* = 5.6 Hz), 53.79, 29.56 (d, *J* = 6.4 Hz), 28.17, 27.37, 22.03, 13.83. **<sup>31</sup>P NMR** (162 MHz, CDCl<sub>3</sub>) δ 4.06. **HRMS** (ESI-TOF) *m/z*: calcd for C<sub>23</sub>H<sub>34</sub>N<sub>3</sub>O<sub>4</sub>PNa [M+Na]<sup>+</sup> 470.2179; found 470.2181.

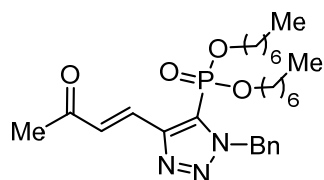

#### Diheptyl(E)-(1-benzyl-4-(3-oxobut-1-en-1-yl)-1H-1,2,3-triazol-5-yl)phosphonate(**3t**)

Isolated by column chromatography over silica gel (eluent, 2:1 petroleum ether/ethyl acetate) to afford **3t** as a yellow oil (81 mg, 81% yield), 0.2 mmol **1h** and benzyl azide (**2a**) were used as starting material was used. <sup>1</sup>H NMR (400 MHz, CDCl<sub>3</sub>) δ 7.70 (d, *J* = 16.1 Hz, 1H), 7.35 – 7.30 (m, 5H), 7.26 (s, 1H), 5.87 (s, 2H), 3.95 (m, 2H), 3.75 (m, 2H), 2.38 (s, 3H), 1.56 – 1.45 (m, 4H), 1.29 – 1.14 (m, 16H), 0.87 (t, 6H). <sup>13</sup>C NMR (101 MHz, CDCl<sub>3</sub>) δ 197.82, 149.10 – 148.29 (m), 135.00, 130.26, 129.26, 128.63, 128.42, 127.90, 126.19 – 123.87 (m), 67.36 (d, *J* = 5.6 Hz), 53.76, 31.53, 30.01 (d, *J* = 6.6 Hz), 28.60, 28.11, 25.20, 22.46, 13.99. <sup>31</sup>P NMR (162 MHz, CDCl<sub>3</sub>) δ 3.08. HRMS (ESI-TOF) *m/z*: calcd for C<sub>27</sub>H<sub>42</sub>N<sub>3</sub>O<sub>4</sub>PNa [M+Na]<sup>+</sup> 540.2962; found 540.2962.

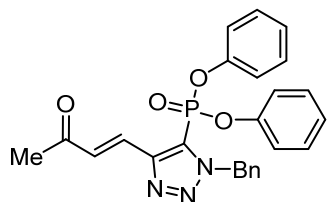

#### Diphenyl (E)-(1-benzyl-4-(3-oxobut-1-en-1-yl)-1H-1,2,3-triazol-5-yl)phosphonate (**3u**)

Isolated by column chromatography over silica gel (eluent, 2:1 petroleum ether/ethyl acetate) to afford **3u** as a yellow oil (66 mg, 71% yield), 0.2 mmol **1i** and benzyl azide (**2a**) were used as starting material was used.as starting material. <sup>1</sup>H NMR (400 MHz,) δ 7.30 – 7.14 (m, 11H), 6.92 (m, 5H), 6.29 (d, *J* = 12.7 Hz, 1H), 5.85 (d, *J* = 19.6 Hz, 2H), 2.30 (s, 3H). <sup>13</sup>C NMR (101 MHz,) δ 202.47, 149.23 (d, *J* = 7.3 Hz), 134.71 (d, *J* = 10.0 Hz), 130.13, 128.87, 128.61, 128.22, 126.15, 121.00, 120.34, 120.30, 54.19, 30.42. <sup>31</sup>P NMR (162 MHz, CDCl<sub>3</sub>) δ -3.78. HRMS (ESI-TOF) *m/z*: calcd for C<sub>25</sub>H<sub>22</sub>N<sub>3</sub>O<sub>4</sub>PNa [M+Na]<sup>+</sup> 482.1240; found 482.1248.

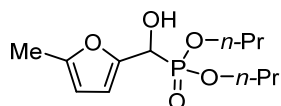

#### dipropyl (hydroxy(5-methylfuran-2-yl) methyl) phosphonate (**1b**)

Isolated by column chromatography over silica gel (eluent, 6:1 petroleum ether/ethyl acetate) 0.91 mmol 5-methyl furfuraldehyde and dipropyl phosphonates (1.2 equiv) were used as starting materials to afford **1b** as a yellow oil (241 mg, 96% yield) <sup>1</sup>H NMR (400 MHz, CDCl<sub>3</sub>) δ 6.39 (t, *J* = 2.8 Hz, 1H), 5.95 (d, *J* = 2.7 Hz, 1H), 4.95 (d, *J* = 13.3 Hz, 1H), 4.12 –

3.98 (m, 4H), 2.29 (s, 3H), 1.74 – 1.59 (m, 4H), 0.98 – 0.85 (m, 7H).  $^{13}\text{C}$  NMR (101 MHz,  $\text{CDCl}_3$ )  $\delta$  152.19, 148.20, 110.05 (d,  $J = 6.0$  Hz), 106.47, 68.53 (dd,  $J = 28.2, 7.0$  Hz), 64.32, (d,  $J = 168.0$  Hz) 23.66 (t,  $J = 5.0$  Hz), 9.76 (d,  $J = 2.3$  Hz).  $^{31}\text{P}$  NMR (162 MHz,  $\text{CDCl}_3$ )  $\delta$  3.74. HRMS (ESI-TOF)  $m/z$ : calcd for  $\text{C}_{12}\text{H}_{21}\text{O}_5\text{PNa}$   $[\text{M}+\text{Na}]^+$  299.1019; found 299.1026.

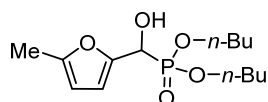

### dibutyl (hydroxy(5-methylfuran-2-yl) methyl) phosphonate (**1c**)

Isolated by column chromatography over silica gel (eluent, 6:1 petroleum ether/ethyl acetate) 0.91 mmol 5-methyl furfuraldehyde and dibutyl phosphonates (1.2 equiv) were used as starting materials to afford **1c** (254 mg, 92% yield).  $^1\text{H}$  NMR (600 MHz,  $\text{CDCl}_3$ )  $\delta$  6.39 (d,  $J = 1.9$  Hz, 1H), 5.93 (s, 1H), 4.96 (d,  $J = 13.3$  Hz, 1H), 4.18 – 3.94 (m, 4H), 2.27 (s, 3H), 1.68 – 1.47 (m, 4H), 1.42 – 1.29 (m, 4H), 1.00 – 0.69 (m, 7H).  $^{13}\text{C}$  NMR (151 MHz,  $\text{CDCl}_3$ )  $\delta$  151.96, 148.30, 109.87 (d,  $J = 6.1$  Hz), 106.37, 66.65 (dd,  $J = 44.6, 7.2$  Hz), 32.23 (t,  $J = 5.7$  Hz), 18.32 (d,  $J = 4.2$  Hz), 13.24 (d,  $J = 6.9$  Hz).  $^{31}\text{P}$  NMR (162 MHz,  $\text{CDCl}_3$ )  $\delta$  3.76. HRMS (ESI-TOF)  $m/z$ : calcd for  $\text{C}_{14}\text{H}_{25}\text{O}_5\text{PNa}$   $[\text{M}+\text{Na}]^+$  327.1332; found 327.1341.

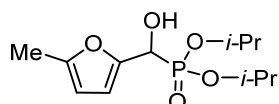

### diisopropyl(hydroxy(5-methylfuran-2-yl)methyl) phosphonate (**1e**)

Isolated by column chromatography over silica gel (eluent, 6:1 petroleum ether/ethyl acetate) 0.91 mmol 5-methyl furfuraldehyde and diisopropyl phosphonates (1.2 equiv) were used as starting materials to afford **1d** as a yellow oil (243 mg, 94% yield) Isolated by column chromatography over silica gel (eluent, 6:1 petroleum ether/ethyl acetate) to afford **1e** as a yellow oil (236 mg, 94% yield)  $^1\text{H}$  NMR (400 MHz,  $\text{CDCl}_3$ )  $\delta$  6.39 (t,  $J = 2.8$  Hz, 1H), 5.96 (t,  $J = 5.7$  Hz, 1H), 4.87 (d,  $J = 13.4$  Hz, 1H), 4.72 (m, 2H), 2.29 (s, 3H), 1.36 – 1.30 (m, 9H), 1.19 (m, 3H).  $^{13}\text{C}$  NMR (101 MHz,  $\text{CDCl}_3$ )  $\delta$  152.45, 148.14, 110.32 (d,  $J = 6.0$  Hz), 106.64, 72.05 (dd,  $J = 30.8, 7.2$  Hz), 64.91 (d,  $J = 168.2$  Hz), 24.64 – 23.01 (m), 13.54.  $^{31}\text{P}$  NMR (162

MHz, CDCl<sub>3</sub>)  $\delta$  3.59. **HRMS** (ESI-TOF)  $m/z$ : calcd for C<sub>12</sub>H<sub>21</sub>O<sub>5</sub>PNa [M+Na]<sup>+</sup> 299.1019; found 299.1007

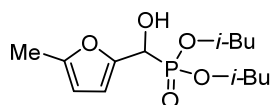

### diisobutyl (hydroxy(5-methylfuran-2-yl)methyl)phosphonate (**1f**)

Isolated by column chromatography over silica gel (eluent, 6:1 petroleum ether/ethyl acetate) 0.91 mmol 5-methyl furfuraldehyde and diisobutyl phosphonates (1.2 equiv) were used as starting materials to afford **1e** (249 mg, 90% yield) <sup>1</sup>H NMR (400 MHz, CDCl<sub>3</sub>)  $\delta$  6.39 (t,  $J$  = 2.7 Hz, 1H), 5.95 (d,  $J$  = 2.4 Hz, 1H), 4.97 (d,  $J$  = 13.2 Hz, 1H), 3.92 – 3.74 (m, 4H), 2.28 (s, 3H), 1.98 – 1.81 (m, 2H), 0.97 – 0.83 (m, 12H). <sup>13</sup>C NMR (101 MHz, CDCl<sub>3</sub>) Unknown NMR (101 MHz),  $\delta$  152.19, 148.20, 110.09 (d,  $J$  = 6.3 Hz), 106.47, 72.83 (dd,  $J$  = 25.8, 7.4 Hz), 64.37 (d,  $J$  = 168.0 Hz), 29.16 – 28.66 (m), 18.36 (d,  $J$  = 5.0 Hz). 13.37. <sup>31</sup>P NMR (162 MHz, CDCl<sub>3</sub>)  $\delta$  3.58. **HRMS** (ESI-TOF)  $m/z$ : calcd for C<sub>14</sub>H<sub>25</sub>O<sub>5</sub>PNa [M+Na]<sup>+</sup> 327.1332; found 327.1332.

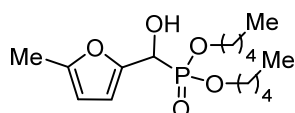

### dipentyl (hydroxy(5-methylfuran-2-yl)methyl)phosphonate (**1g**)

Isolated by column chromatography over silica gel (eluent, 6:1 petroleum ether/ethyl acetate) 0.91 mmol 5-methyl furfuraldehyde and dipentyl phosphonates (1.2 equiv) were used as starting materials to afford **1f** as a yellow oil (271 mg, 89% yield) <sup>1</sup>H NMR (400 MHz, CDCl<sub>3</sub>)  $\delta$  6.39 (s, 1H), 5.96 (s, 1H), 4.93 (d,  $J$  = 13.3 Hz, 1H), 4.16 – 3.95 (m, 4H), 2.29 (s, 3H), 2.17 (s, 3H), 1.73 – 1.52 (m, 5H), 1.40 – 1.19 (m, 10H), 0.89 (m, 7H). <sup>13</sup>C NMR (101 MHz, CDCl<sub>3</sub>)  $\delta$  152.29, 148.04, 110.15, 110.12 (d,  $J$  = 6.0 Hz), 67.08 (dd,  $J$  = 25.8, 7.2 Hz), 64.36 (d,  $J$  = 167.4 Hz), 29.99 (t,  $J$  = 5.5 Hz), 27.33 (d,  $J$  = 3.1 Hz), 22.01, 13.57 (d,  $J$  = 37.3 Hz). <sup>31</sup>P NMR (162 MHz, CDCl<sub>3</sub>)  $\delta$  3.74. **HRMS** (ESI-TOF)  $m/z$ : calcd for C<sub>16</sub>H<sub>29</sub>O<sub>5</sub>PNa [M+Na]<sup>+</sup> 355.1635; found 355.1635.



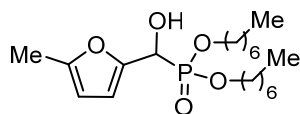

### diheptyl (hydroxy(5-methylfuran-2-yl)methyl)phosphonate (**1h**)

Isolated by column chromatography over silica gel (eluent, 6:1 petroleum ether/ethyl acetate) 0.91 mmol 5-methyl furfuraldehyde and diheptyl phosphonates (1.2 equiv) were used as starting materials to afford **1g** as a yellow oil (317 mg, 90% yield). <sup>1</sup>H NMR (400 MHz, CDCl<sub>3</sub>) δ 6.39 (t, 1H), 5.94 (d, *J* = 2.7 Hz, 2H), 4.94 (d, *J* = 13.2 Hz, 2H), 4.17 – 3.95 (m, 4H), 2.28 (s, 3H), 1.73 – 1.53 (m, 4H), 1.29 (m, 17H) (t, 6H). <sup>13</sup>C NMR (101 MHz, CDCl<sub>3</sub>) δ 152.39, 148.14, 110.23 (d, *J* = 6.2 Hz), 106.60, δ67.21 (dd, *J* = 26.1, 7.2 Hz), 64.46 (d, *J* = 167.2 Hz), 31.62, 30.48, 30.42, 30.37, 28.74, 25.26 (d, *J* = 3.2 Hz), 22.48, 13.97, 13.49. <sup>31</sup>P NMR (162 MHz, CDCl<sub>3</sub>) δ 3.80. HRMS (ESI-TOF) *m/z*: calcd for C<sub>20</sub>H<sub>37</sub>O<sub>5</sub>PNa [M+Na]<sup>+</sup> 422.2271; found 422.2251.

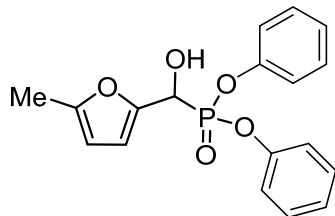

### Diphenyl (hydroxy(5-methylfuran-2-yl)methyl)phosphonate(**1i**)

Isolated by column chromatography over silica gel (eluent, 4:1 petroleum ether/ethyl acetate) 0.91 mmol 5-methyl furfuraldehyde and diphenyl phosphonates (1.2 equiv) were used as starting materials to afford **1g** as a yellow oil (161 mg, 51% yield). <sup>1</sup>H NMR (400 MHz, ) δ 7.30 – 7.17 (m, 4H), 7.17 – 6.96 (m, 6H), 6.39 (t, 1H), 5.88 (d, *J* = 2.7 Hz, 1H), 5.17 (d, *J* = 12.6 Hz, 1H), 2.17 (s, 3H). <sup>13</sup>C NMR (101 MHz, ) δ 153.45, 150.36 (d, *J* = 12.8 Hz), 146.58, δ129.75 (d, *J* = 7.9 Hz), 125.40 (d, *J* = 9.2 Hz), 120.79 (d, *J* = 3.9 Hz), 120.63 (d, *J* = 3.9 Hz), 111.61, 107.05, 64.55 (d, *J* = 169.8 Hz), 13.63. <sup>31</sup>P NMR (162 MHz, CDCl<sub>3</sub>) δ 12.69. HRMS (ESI-TOF) *m/z*: calcd for C<sub>18</sub>H<sub>17</sub>N<sub>3</sub>O<sub>5</sub>PNa [M+Na]<sup>+</sup> 367.0706; found 367.0709.

## VII. Copies of $^1\text{H}$ , $^{13}\text{C}$ and $^{31}\text{P}$ NMR Spectra for products and substrates

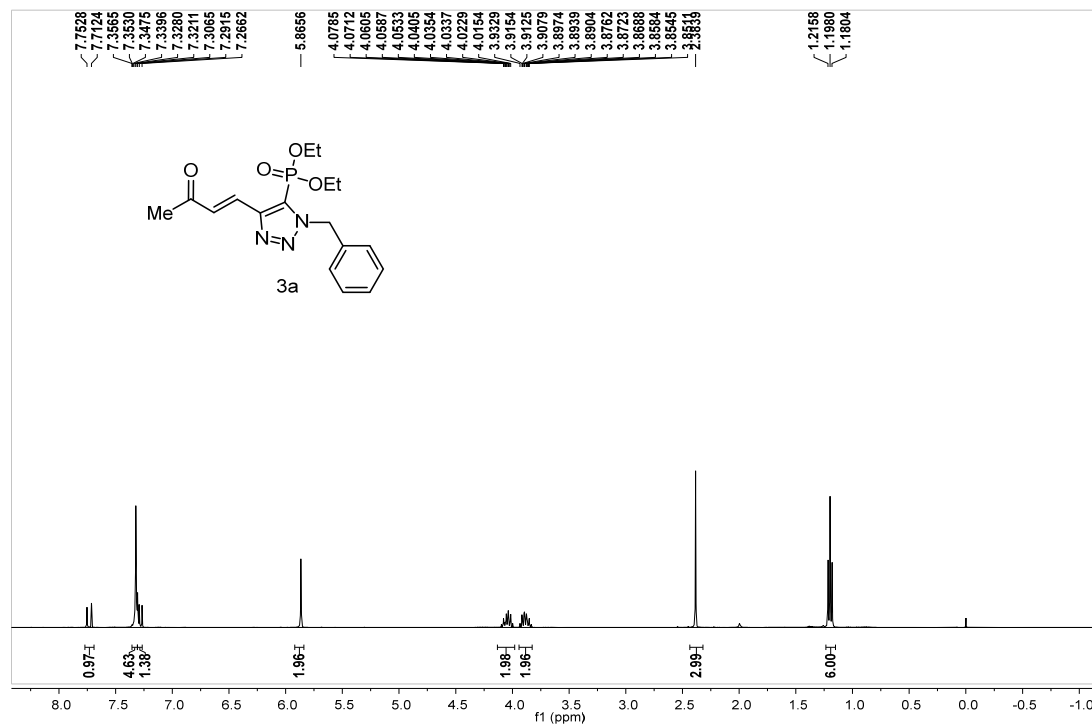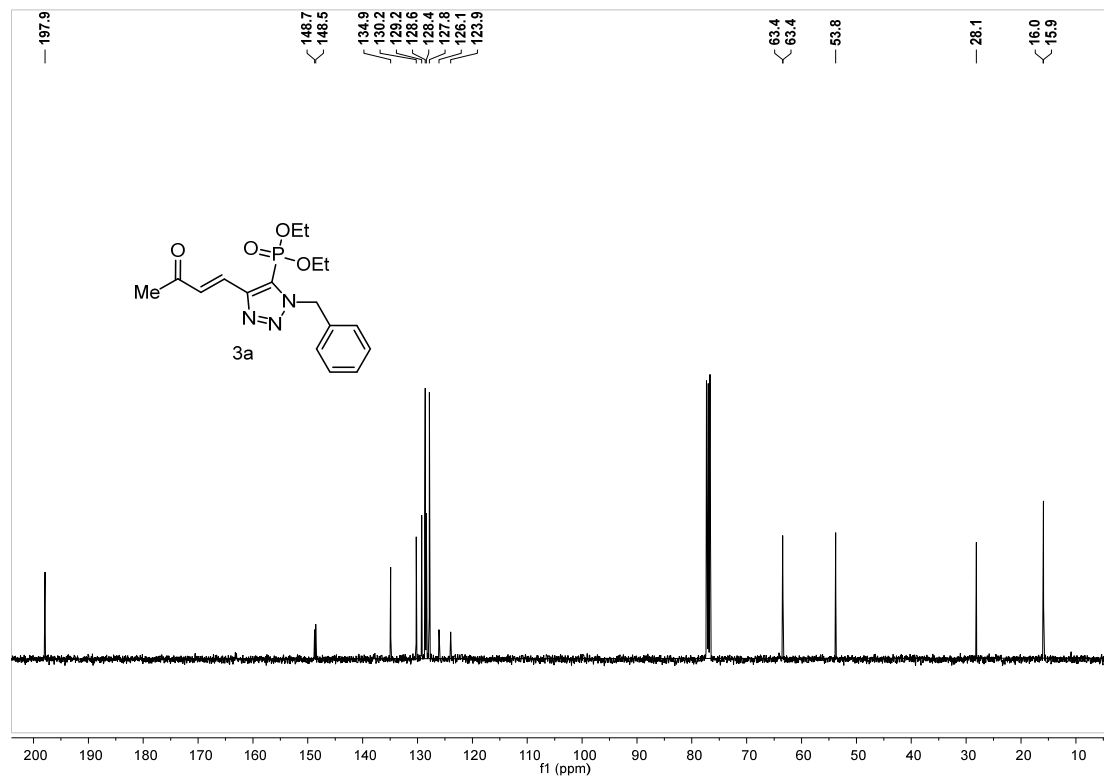

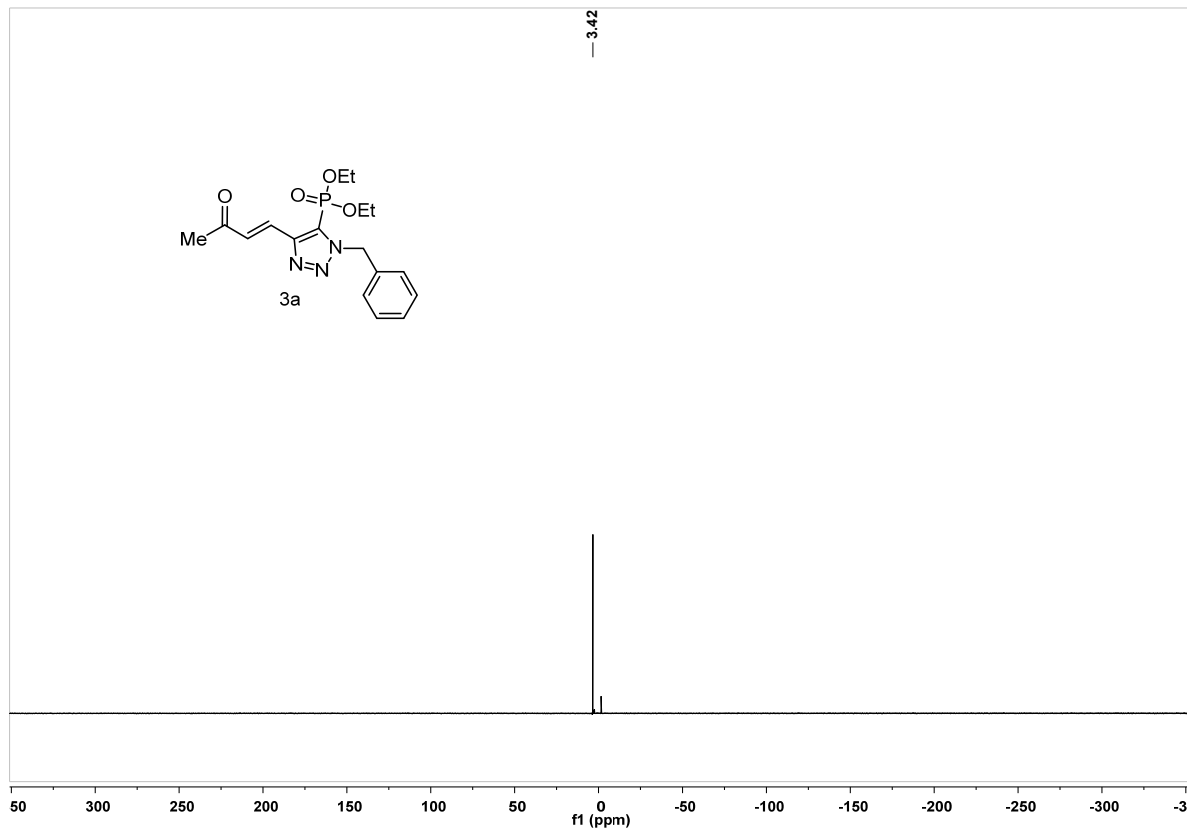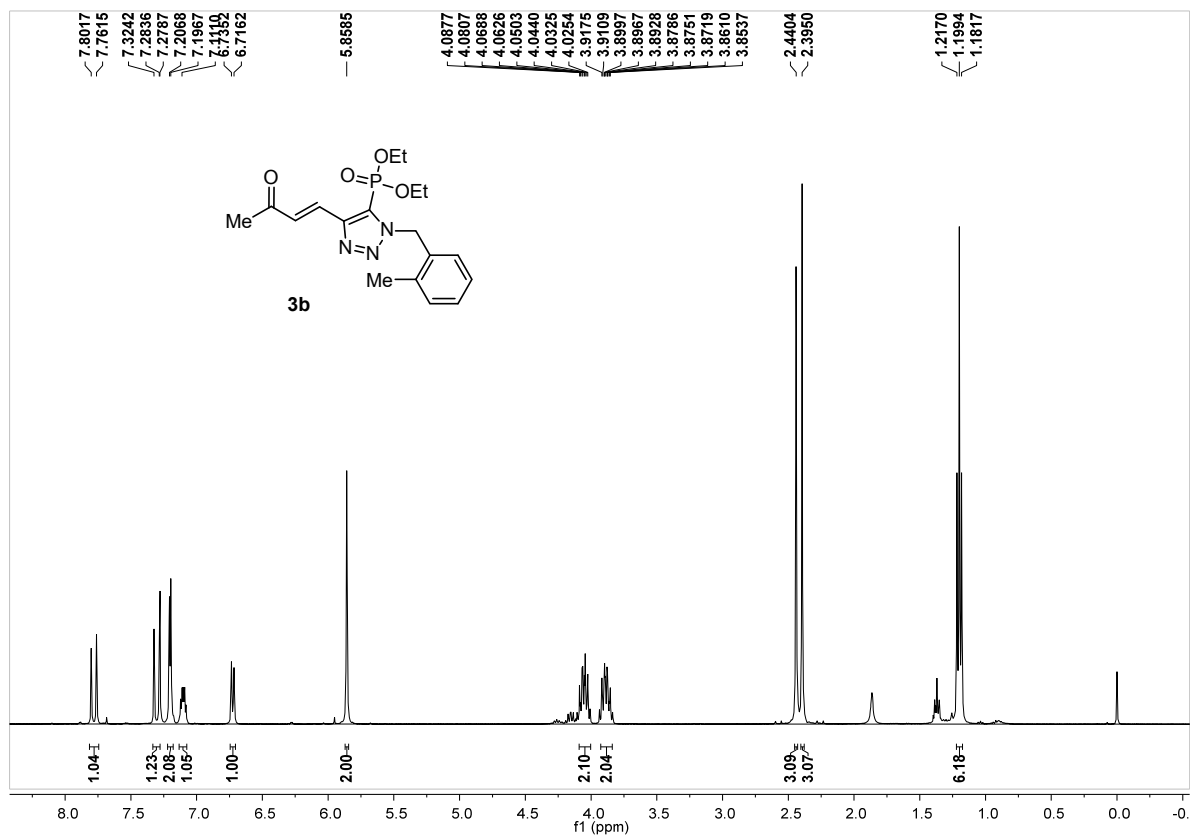

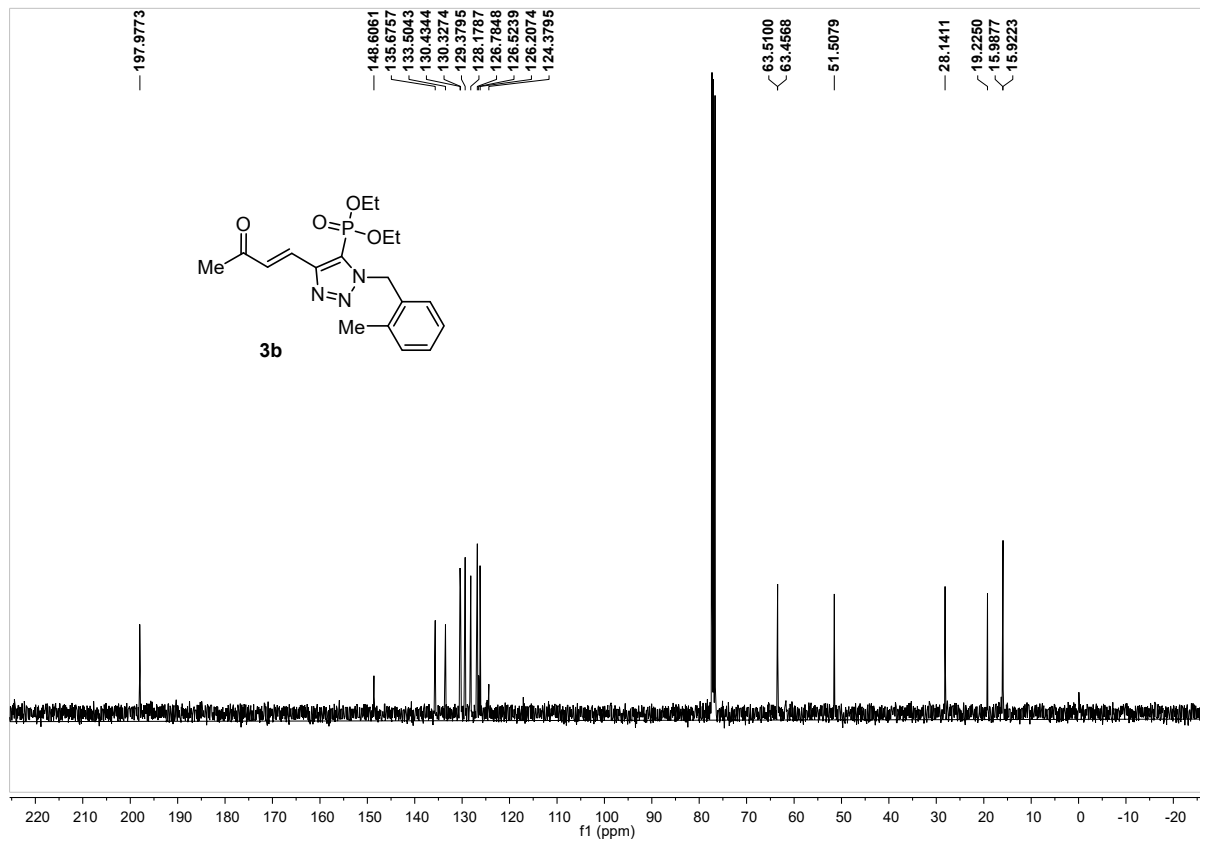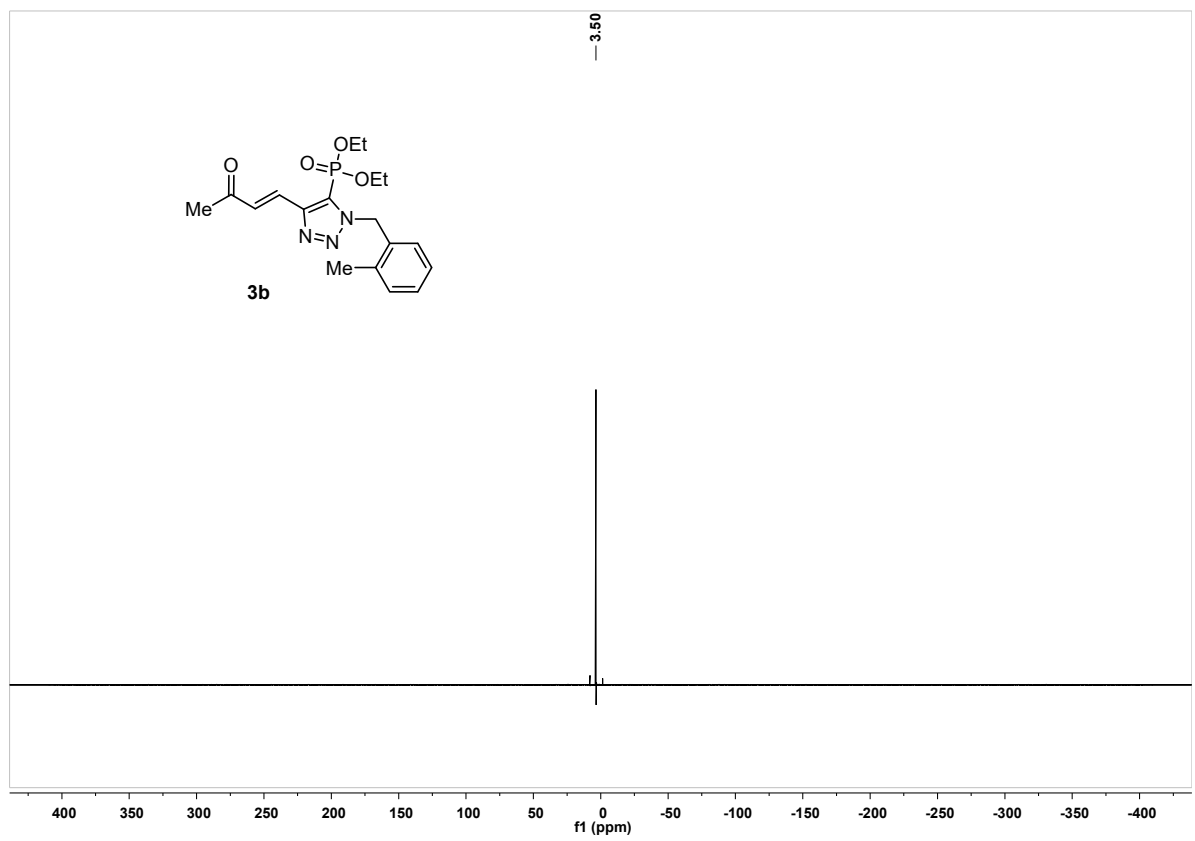

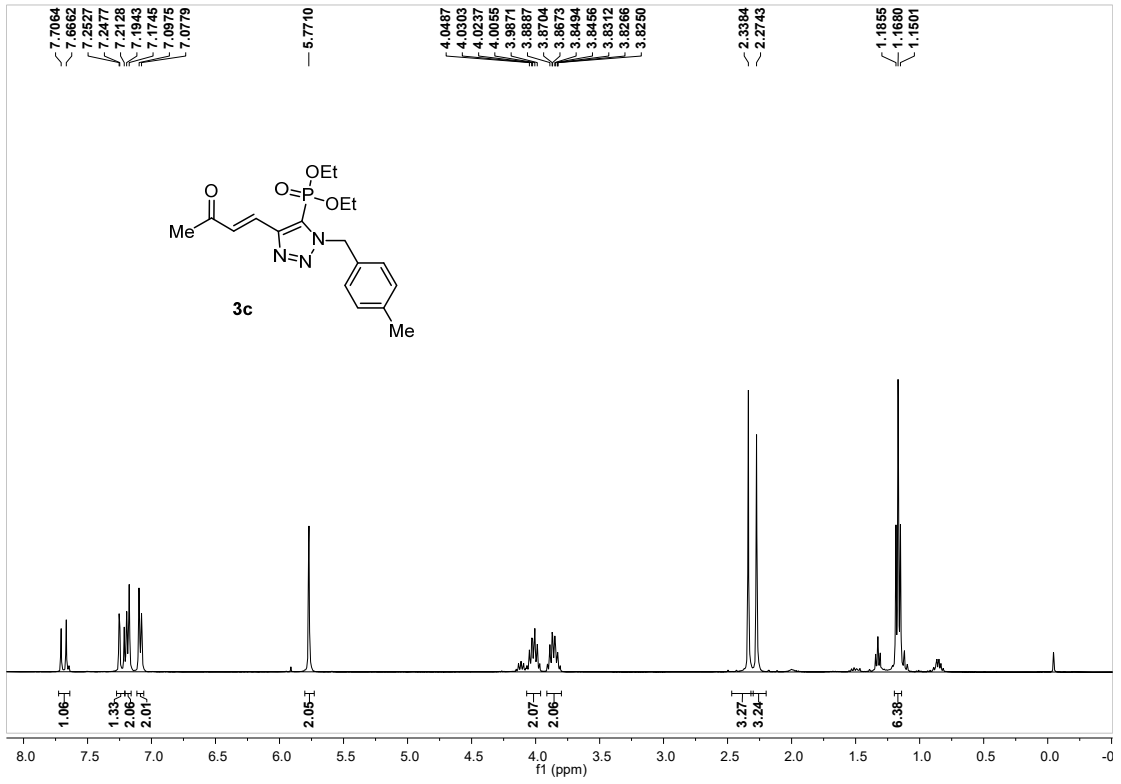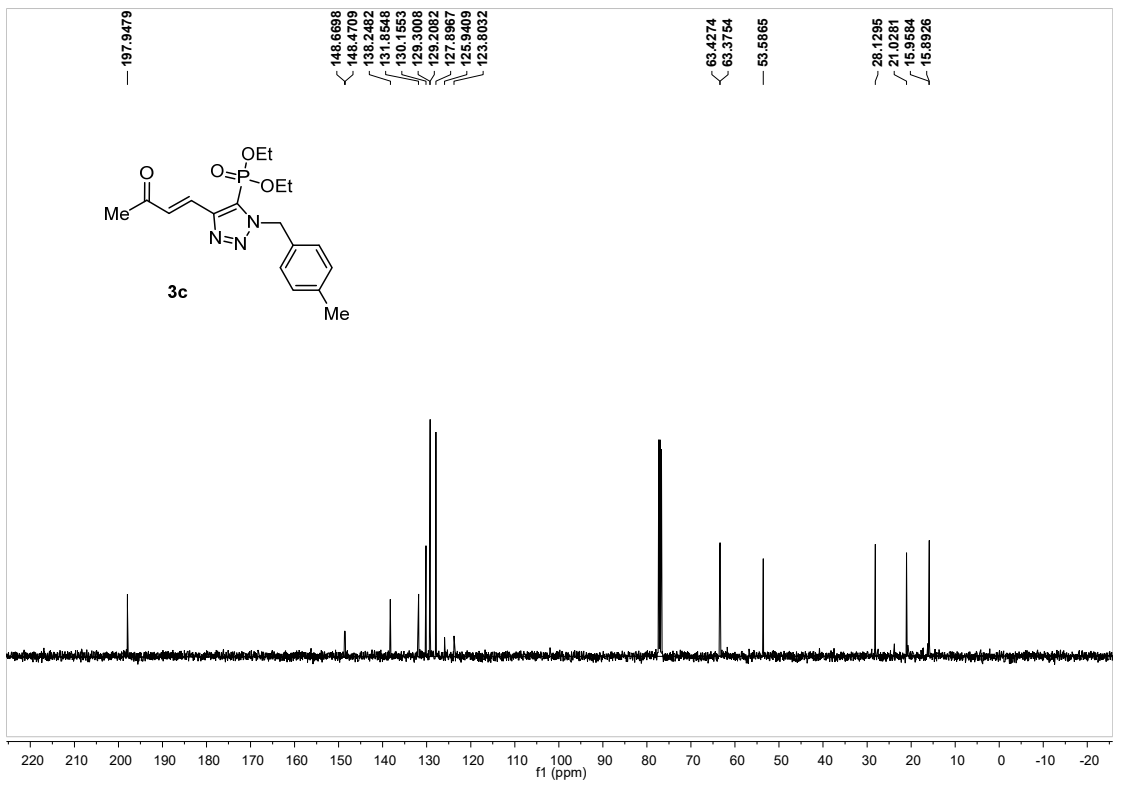

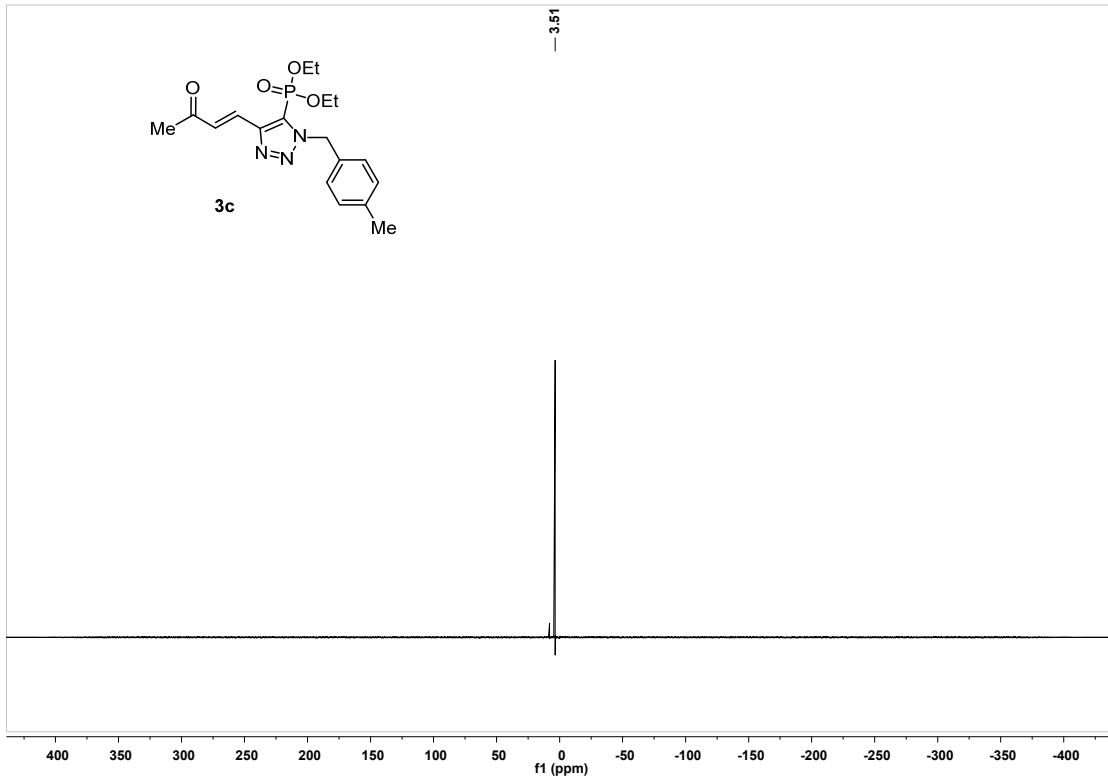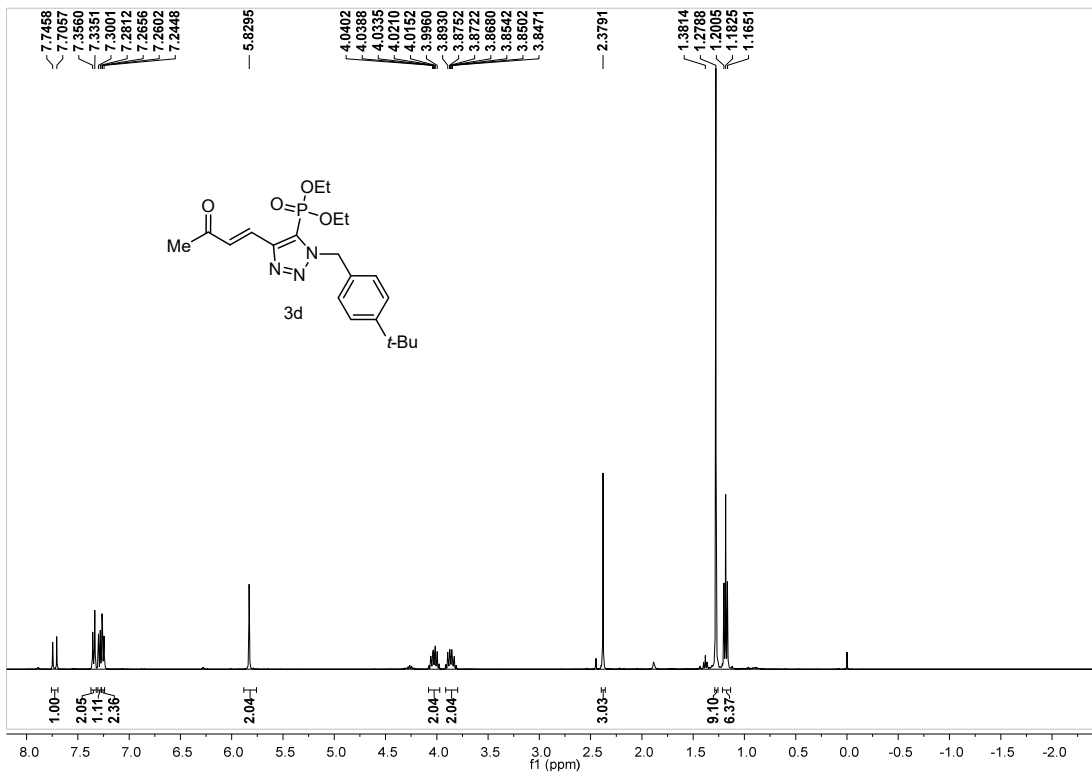

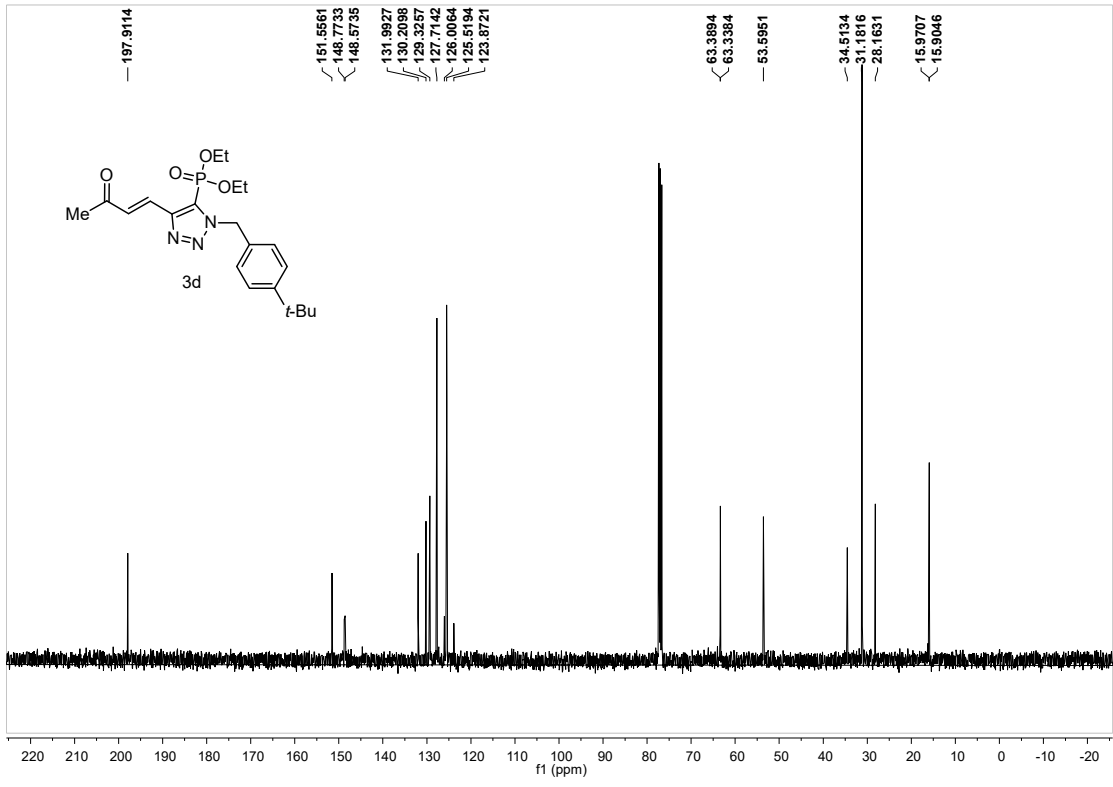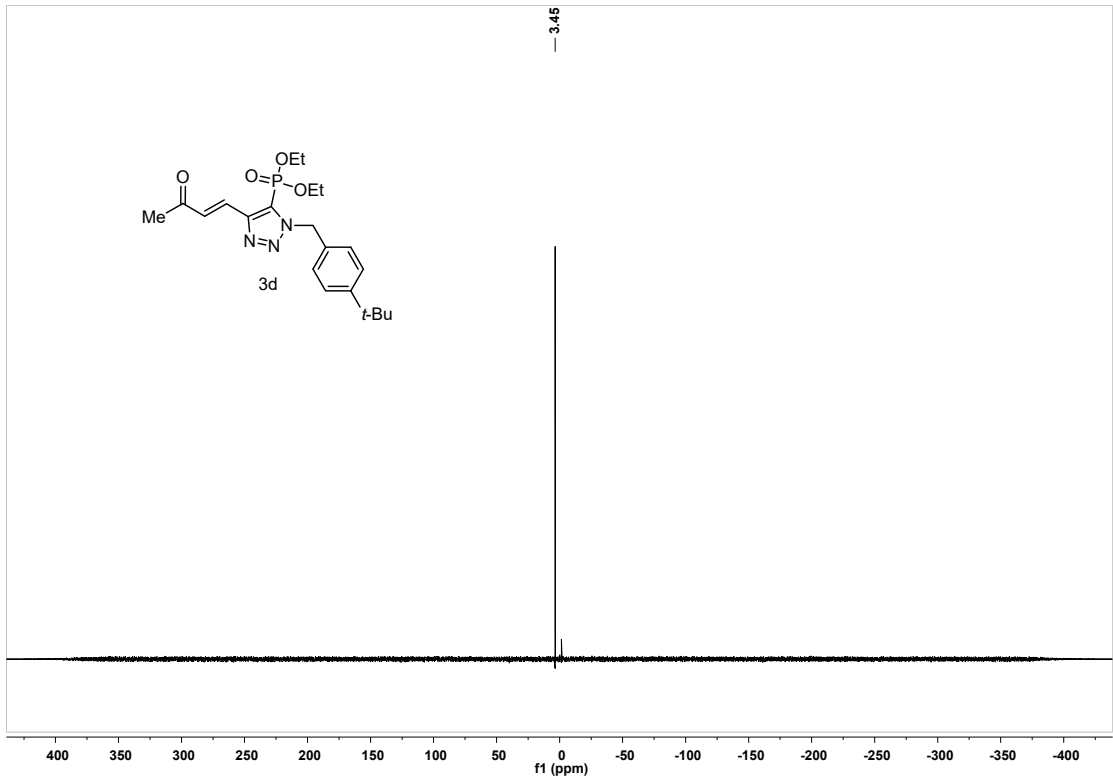

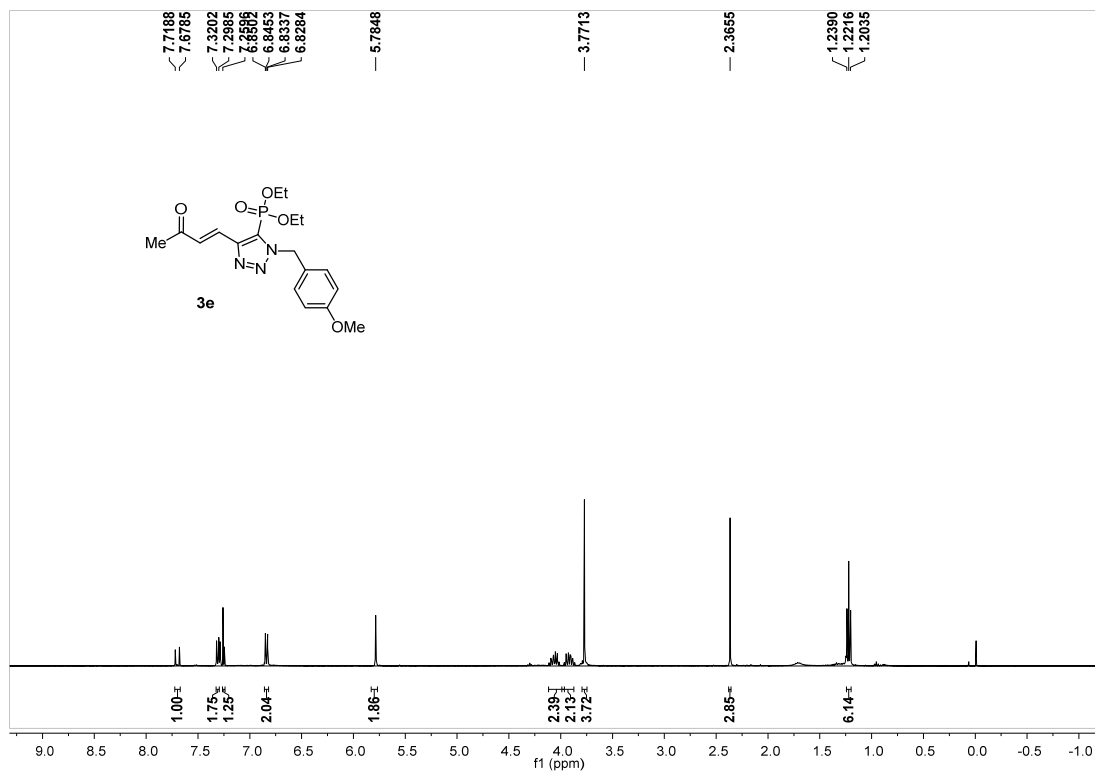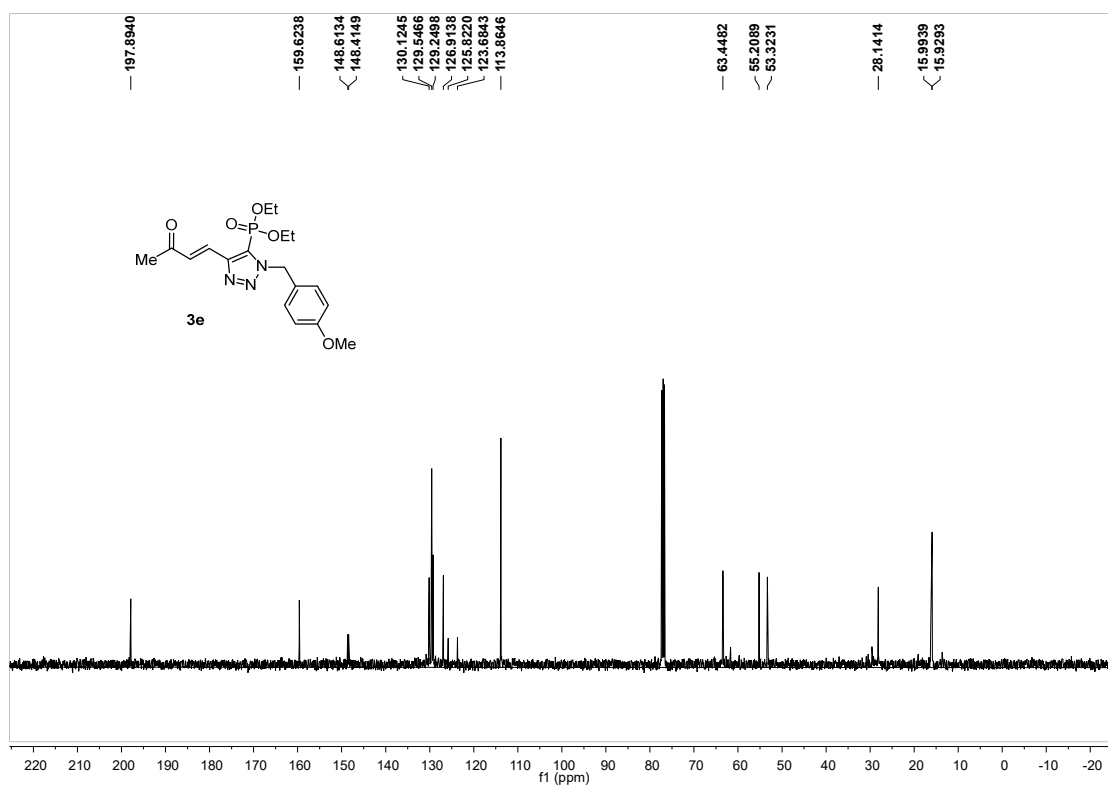



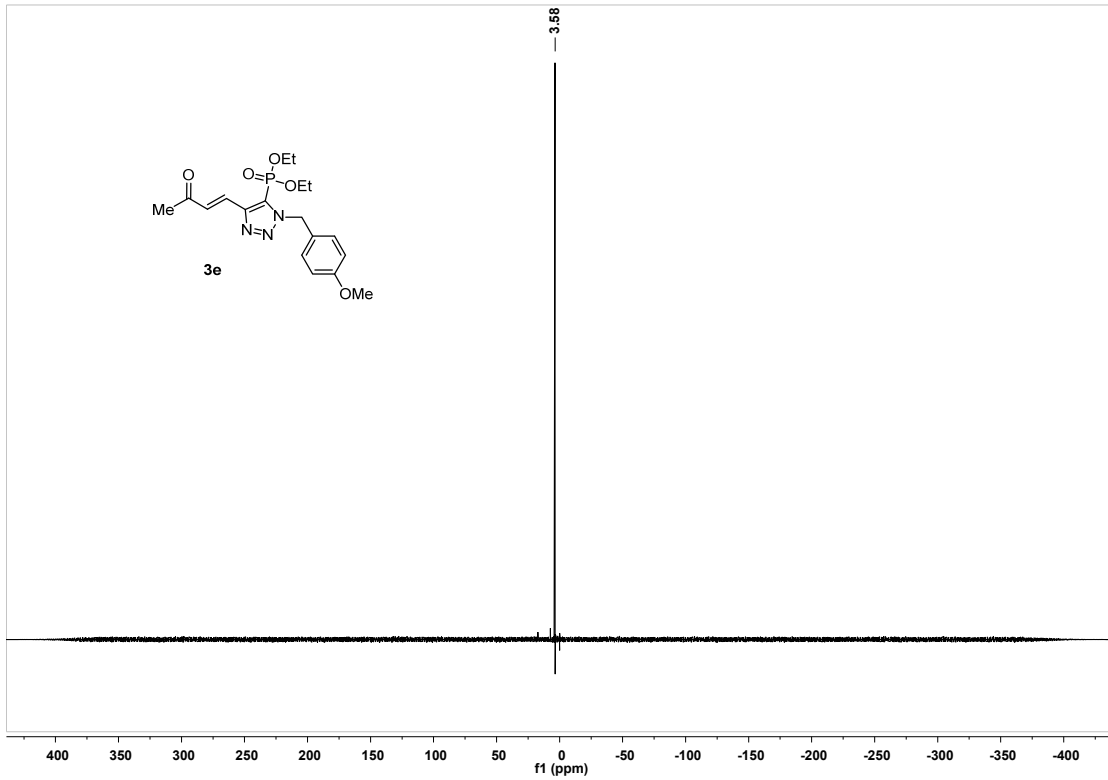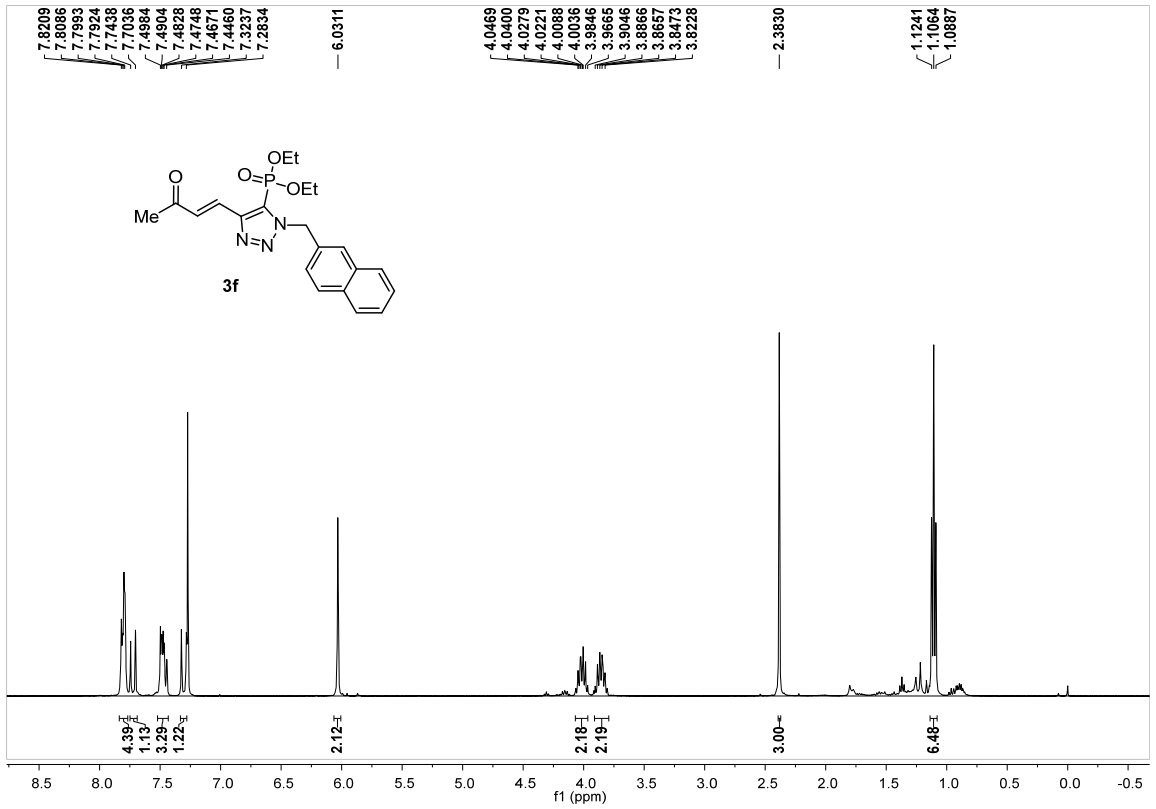

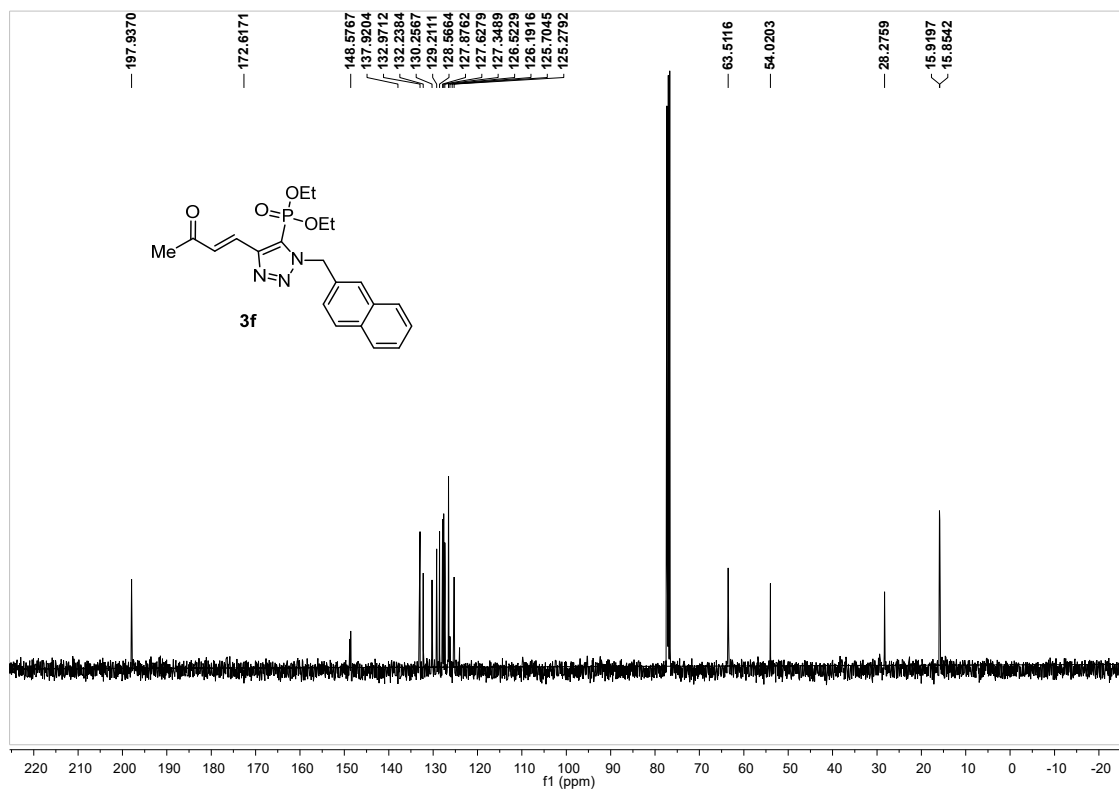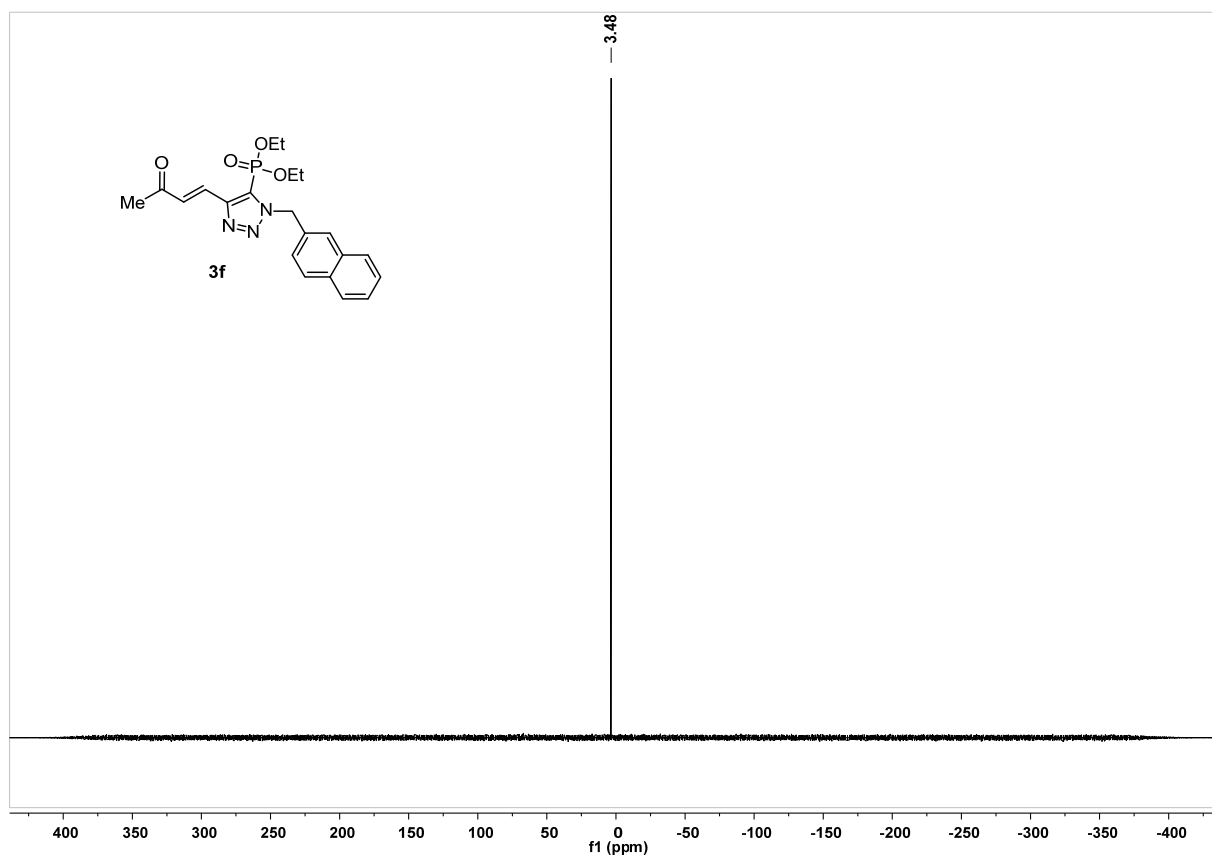

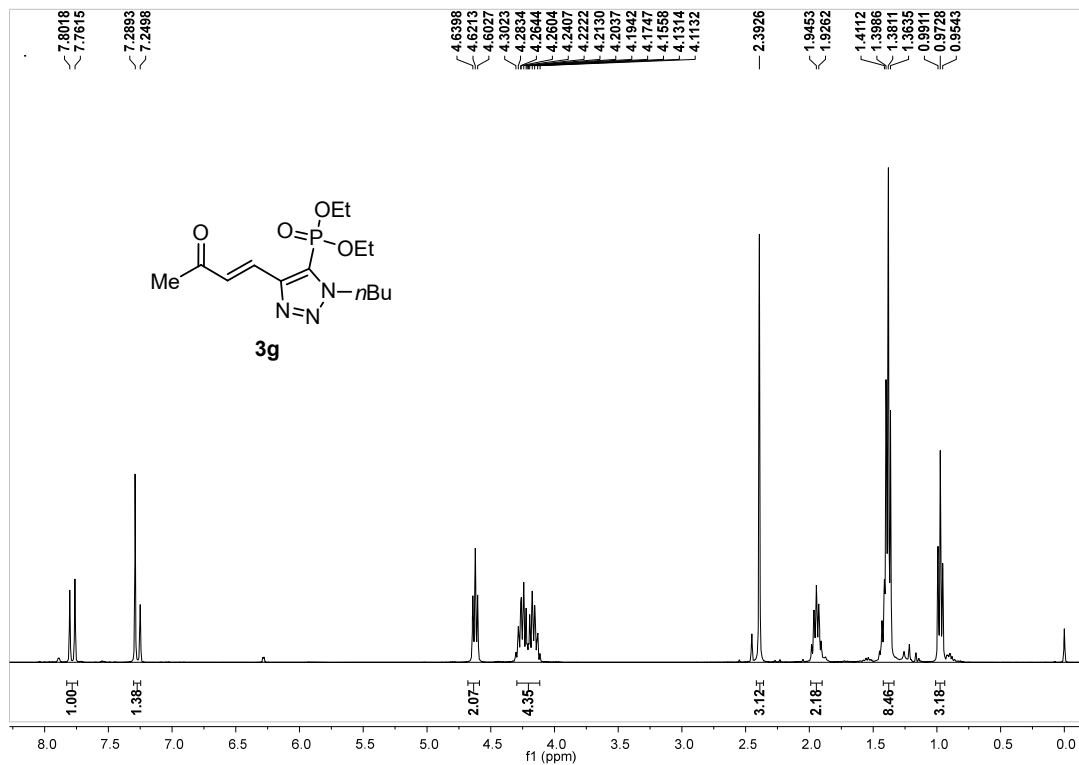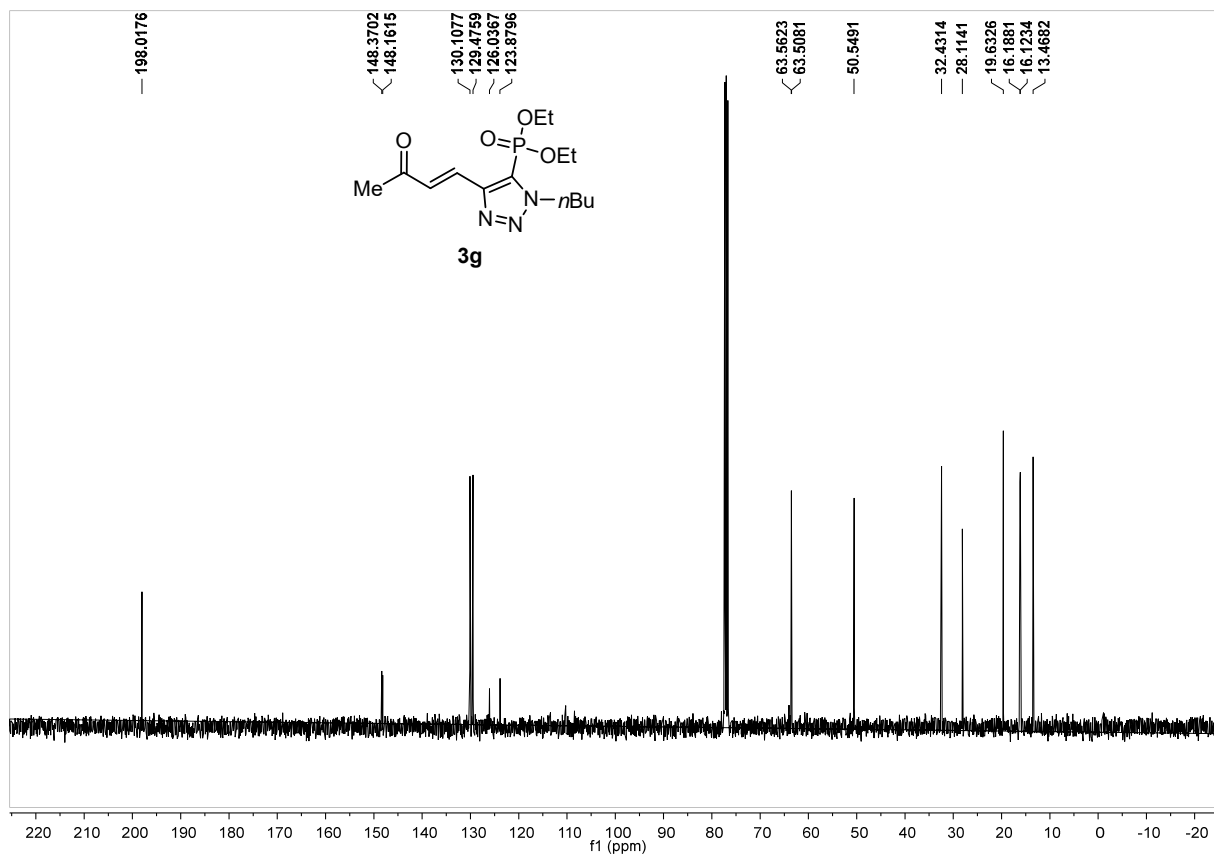

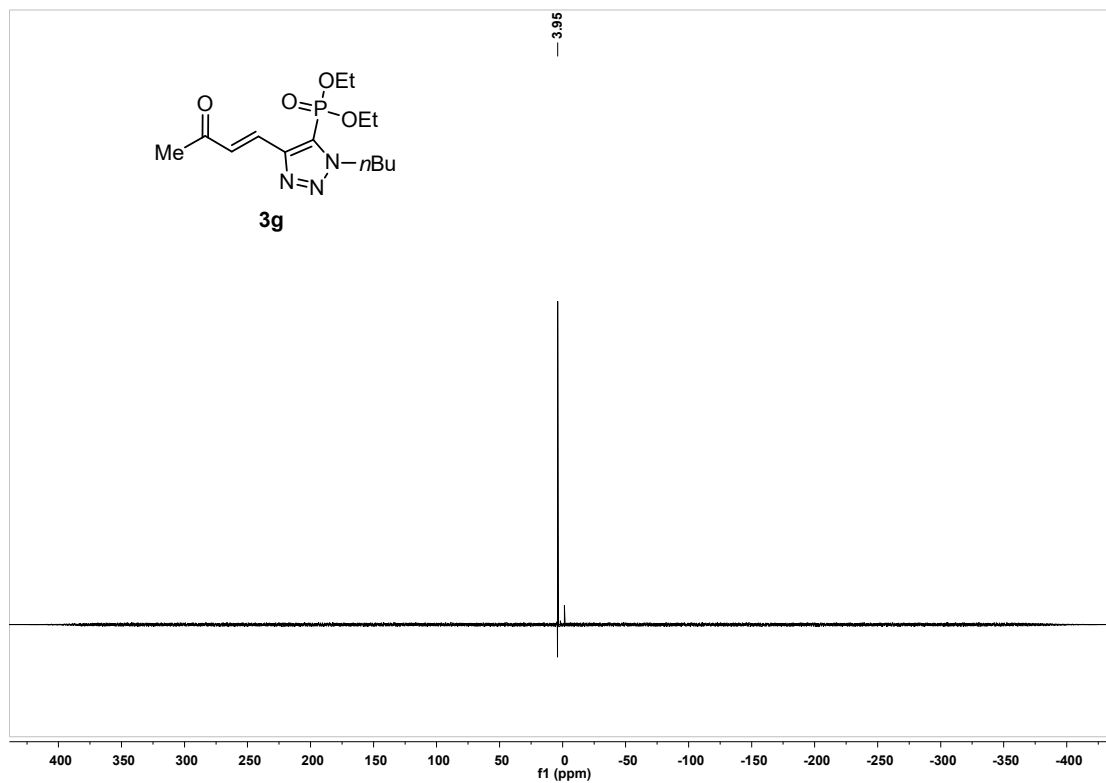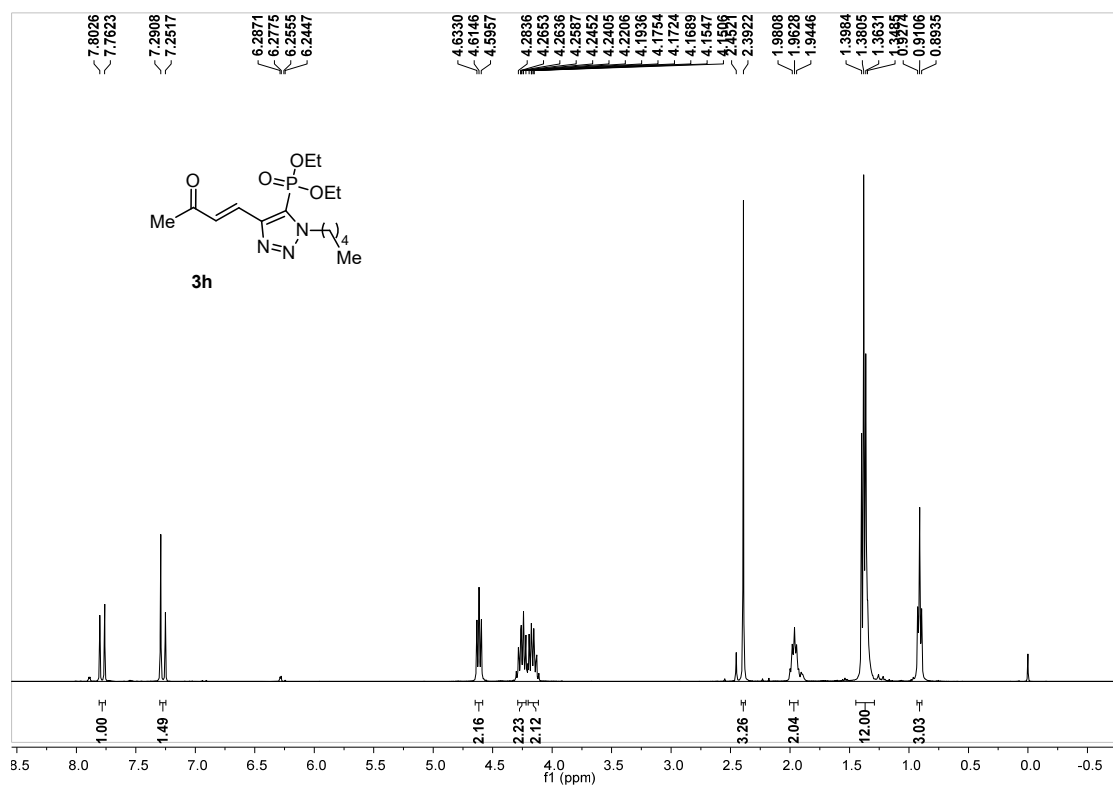

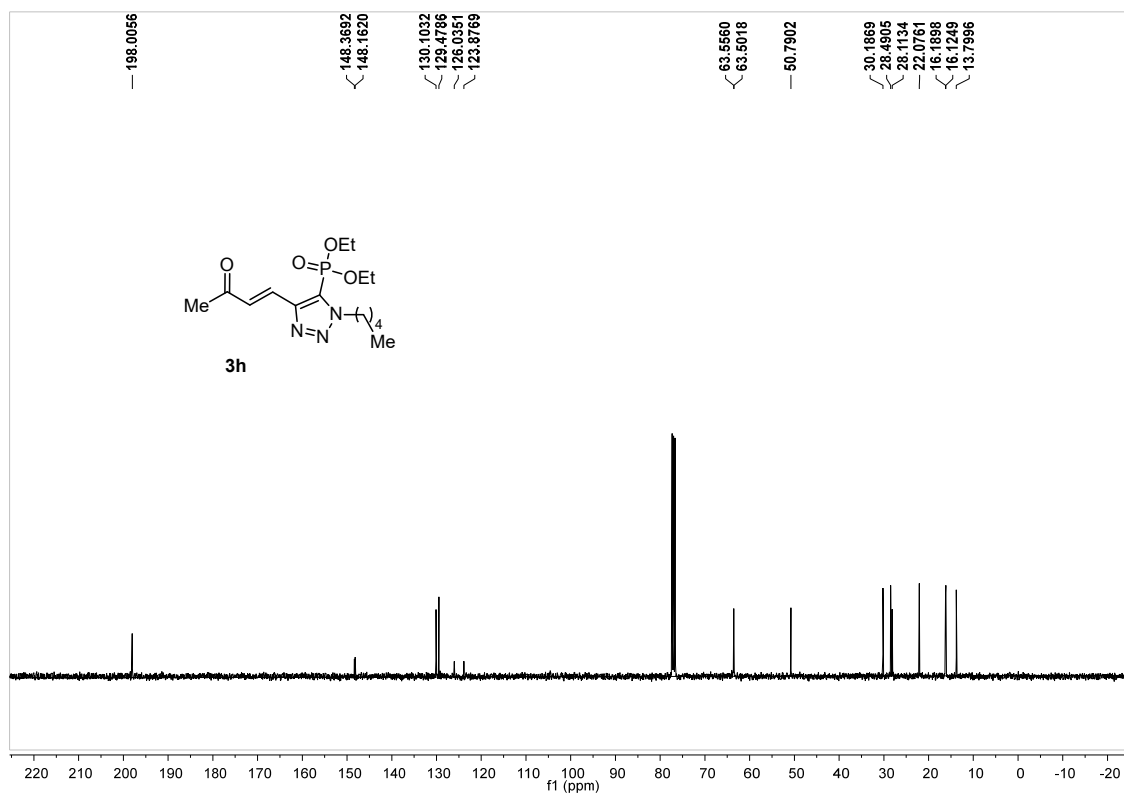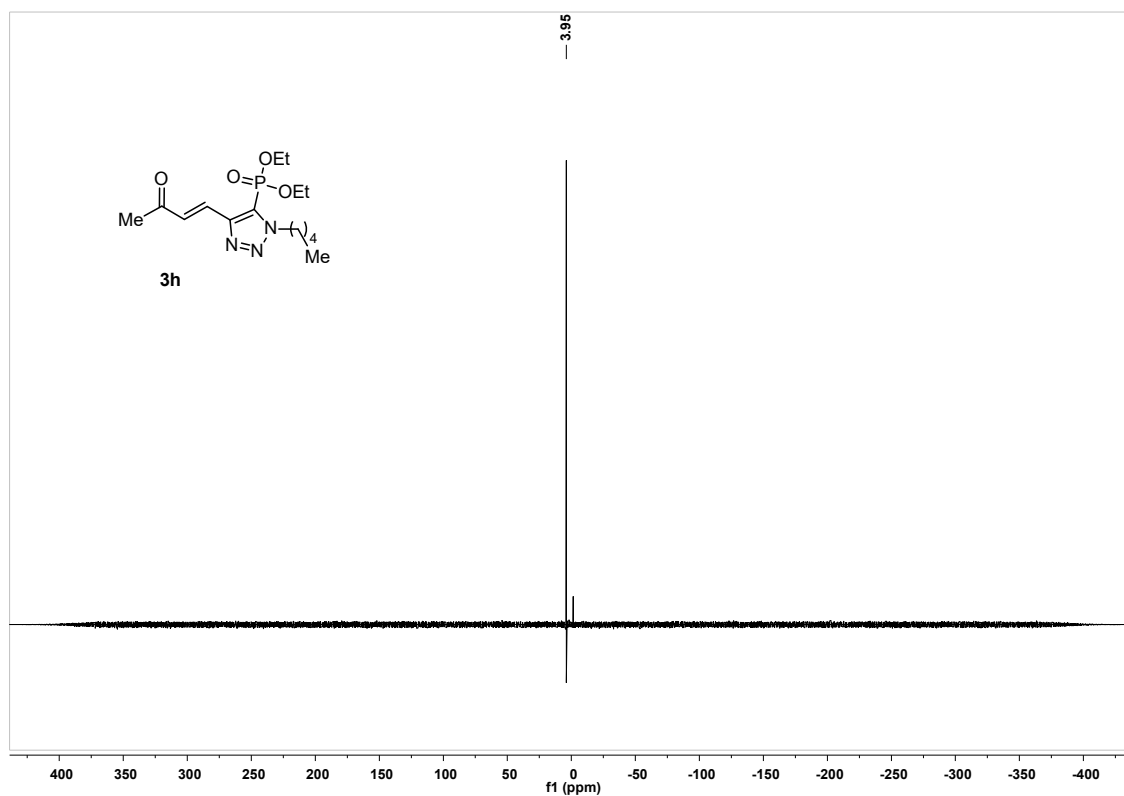

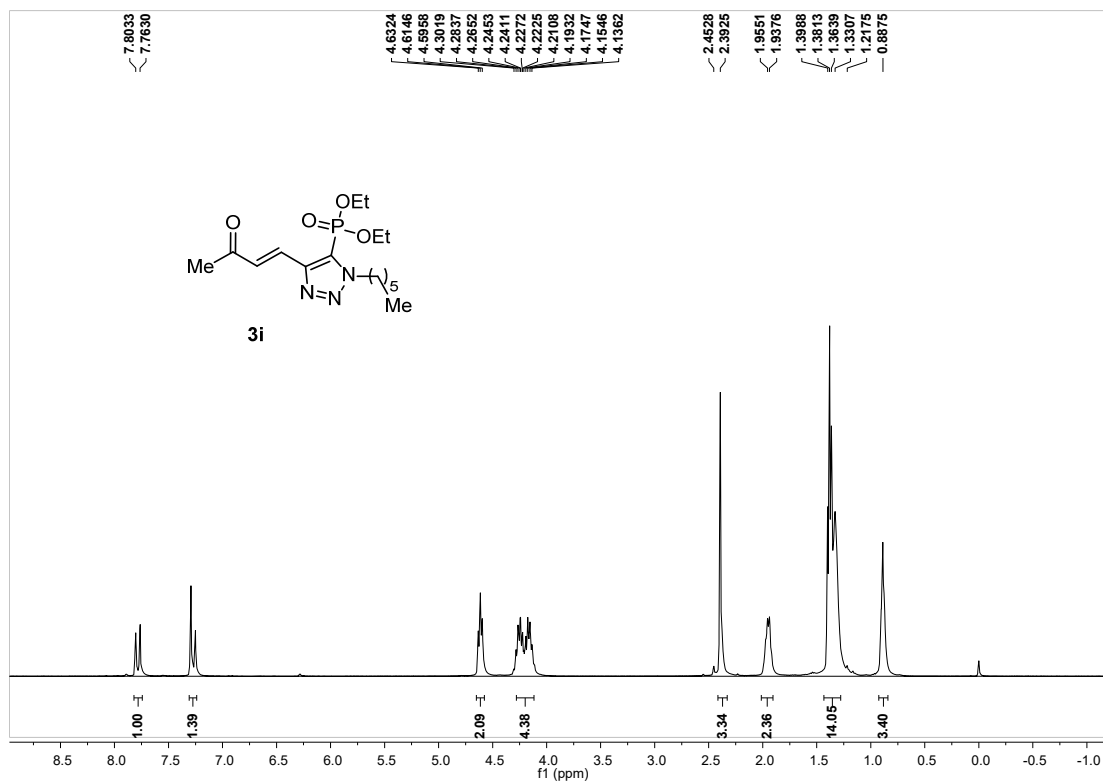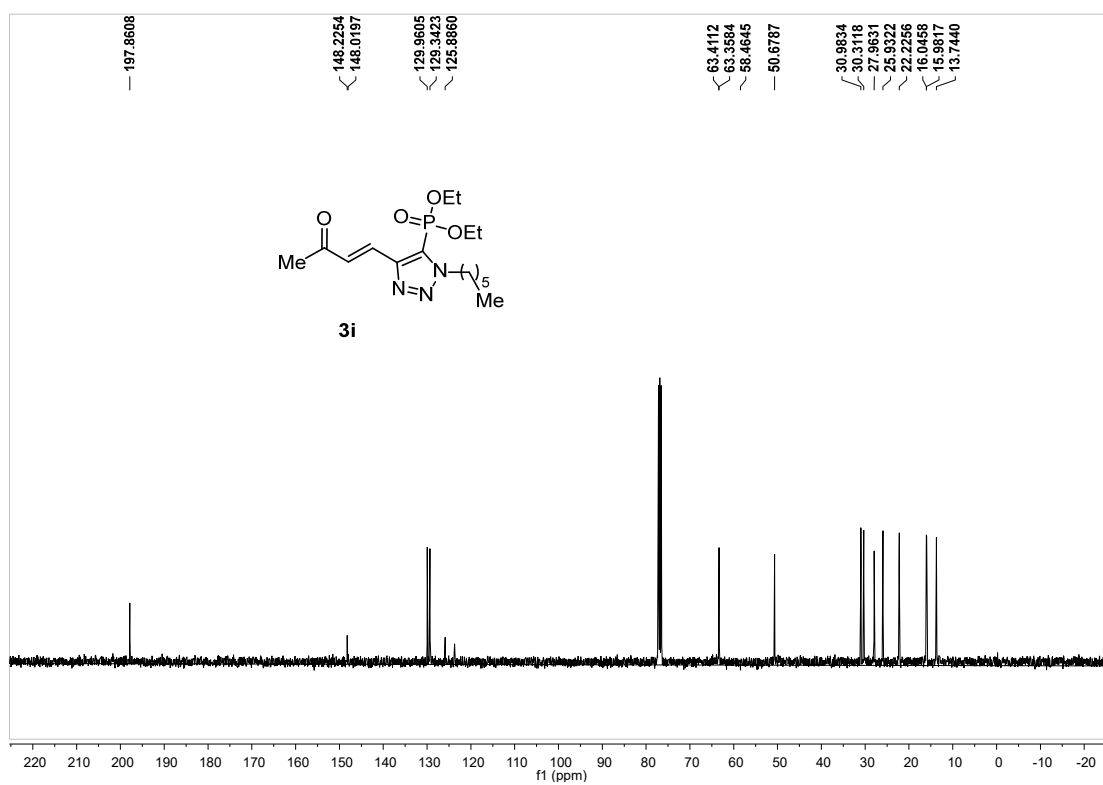

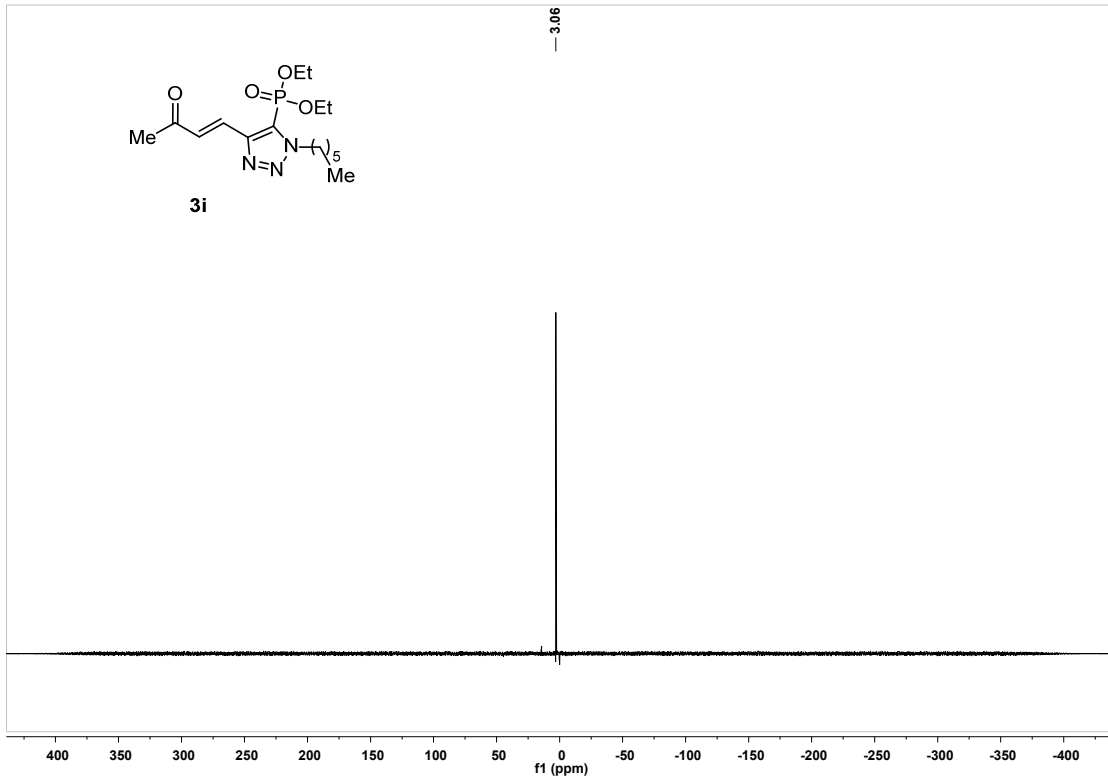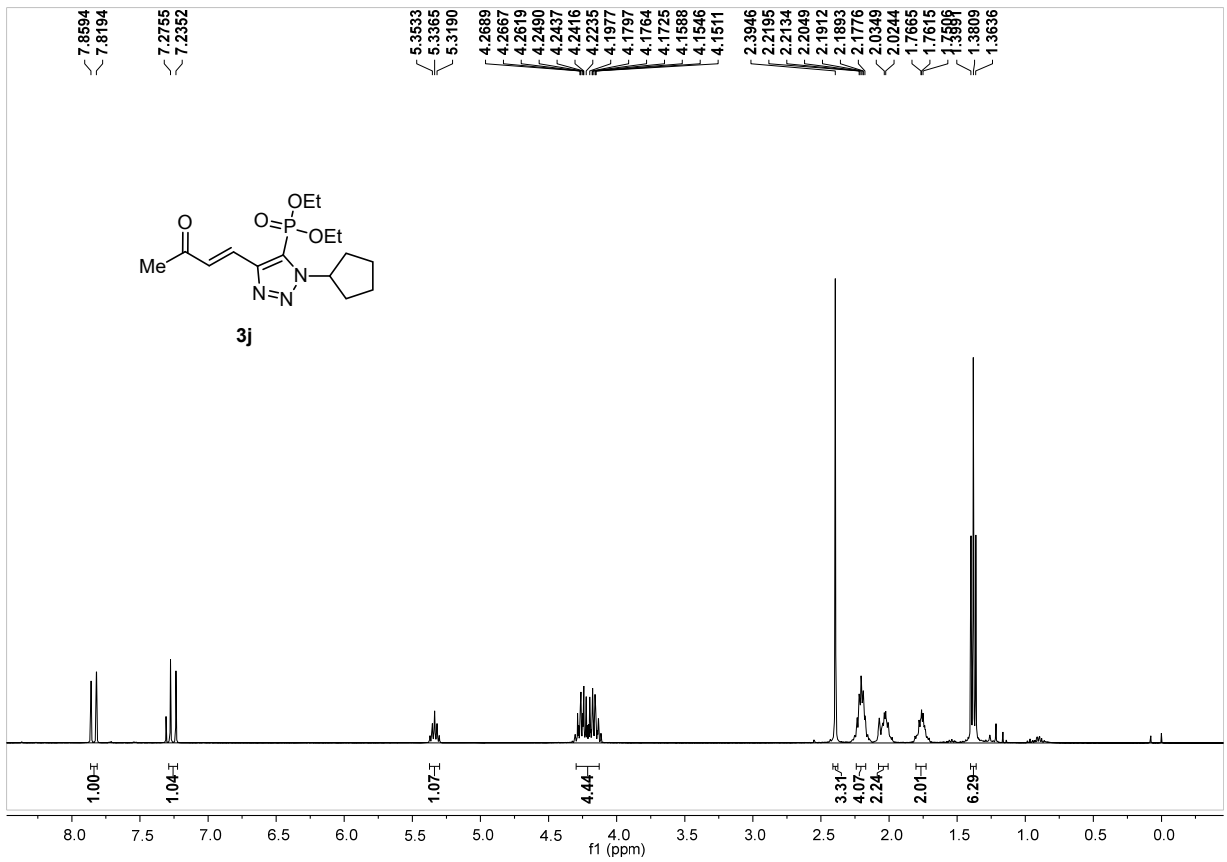

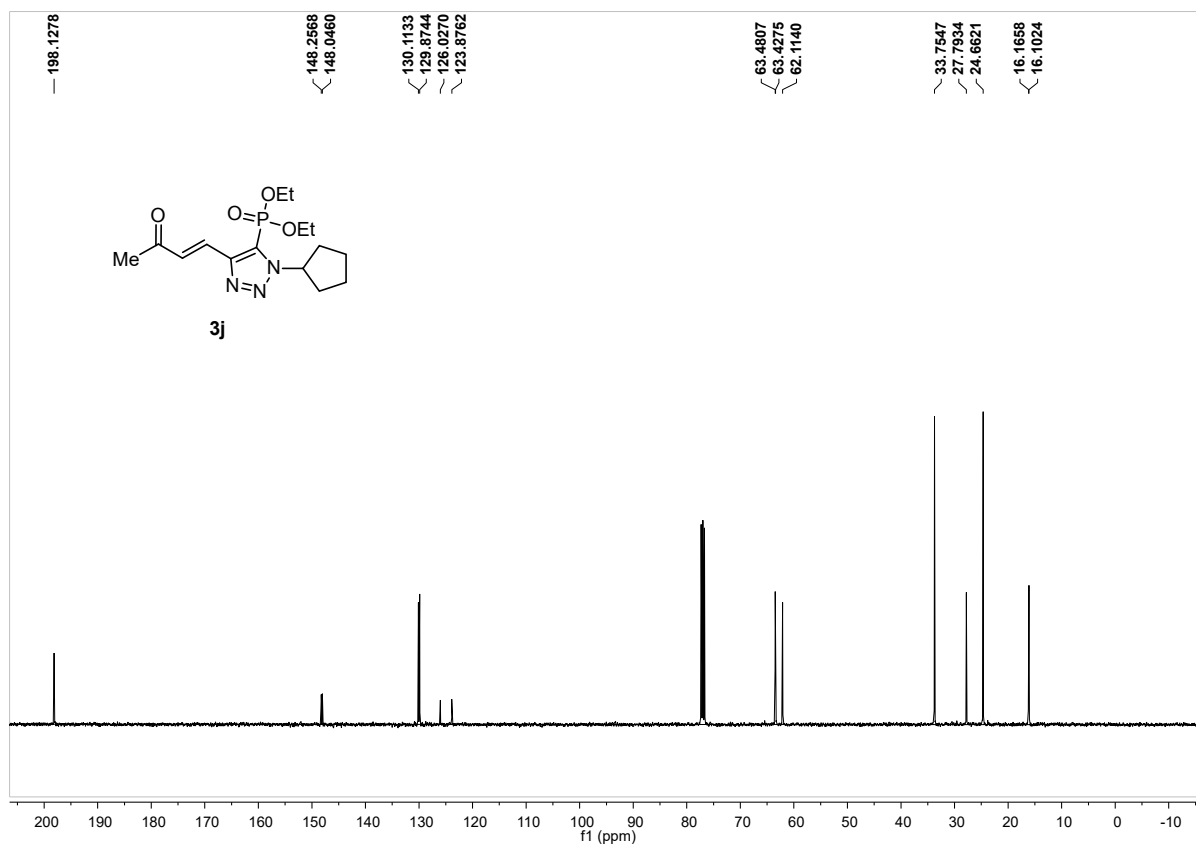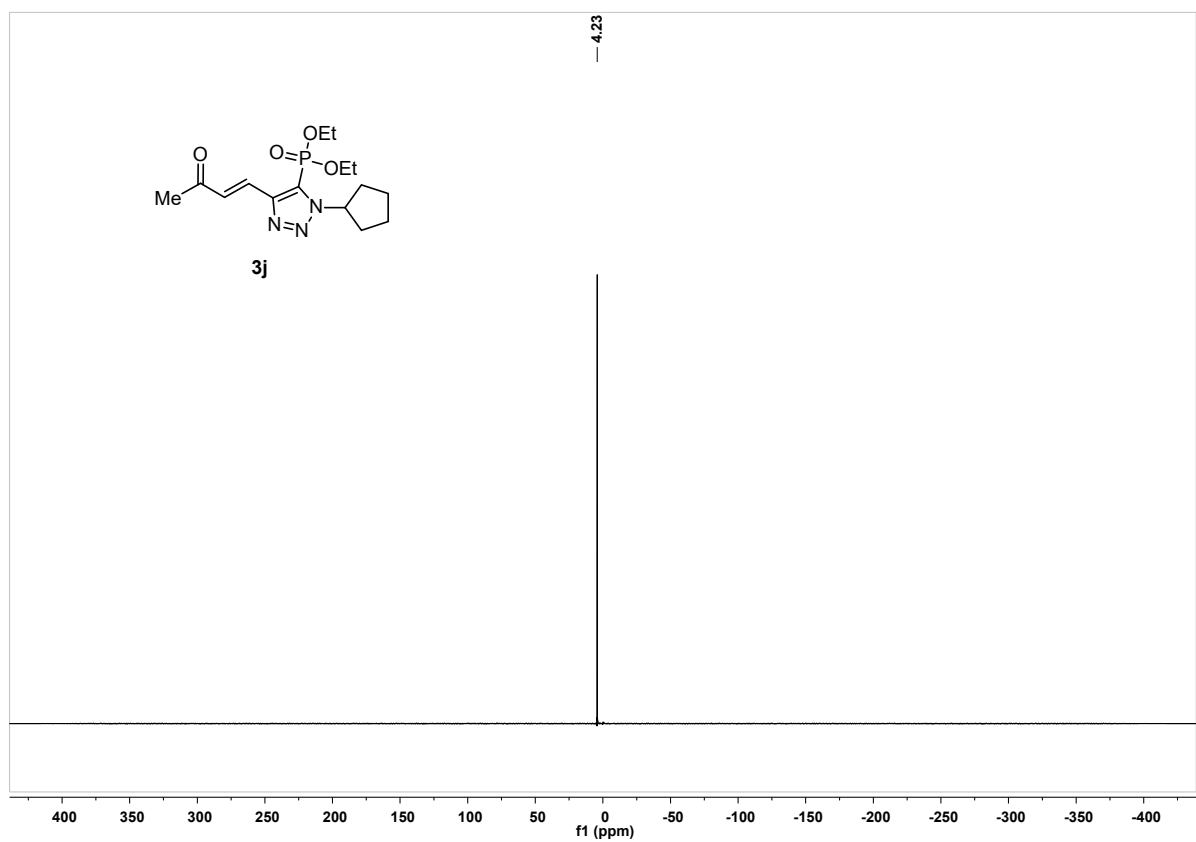



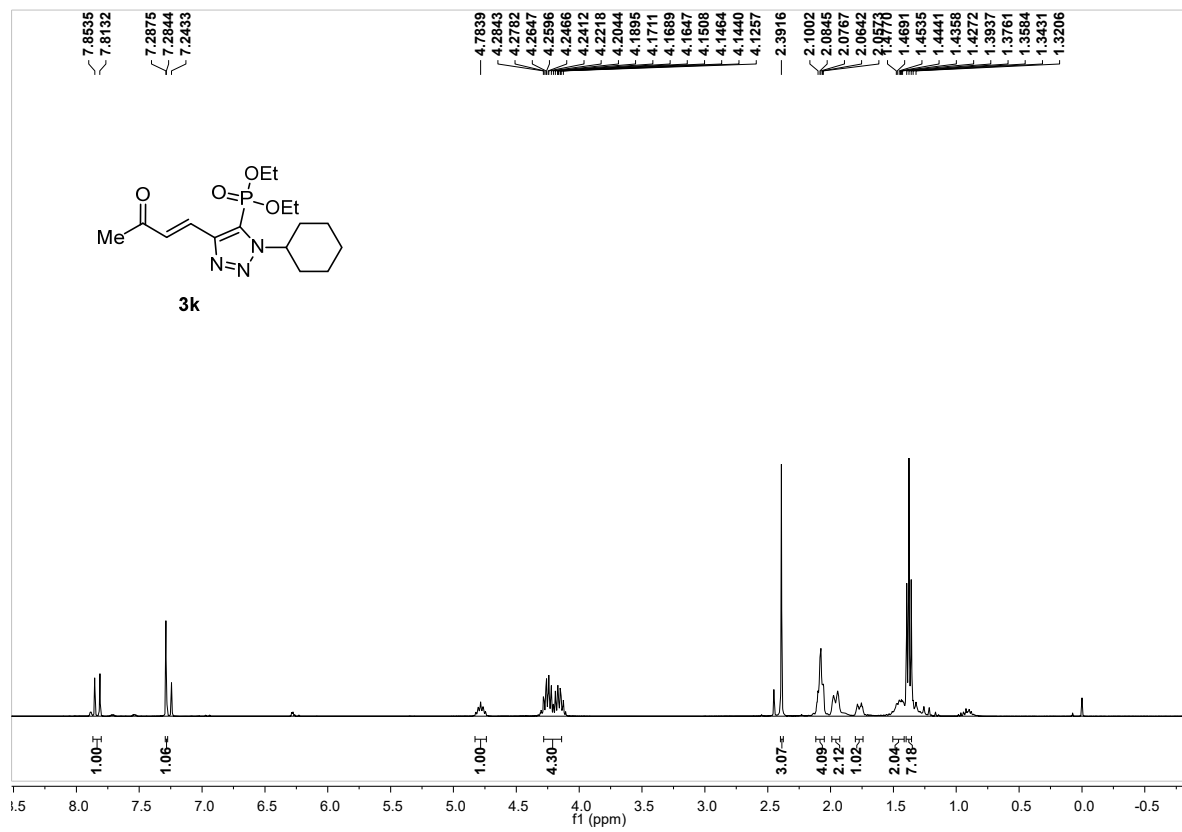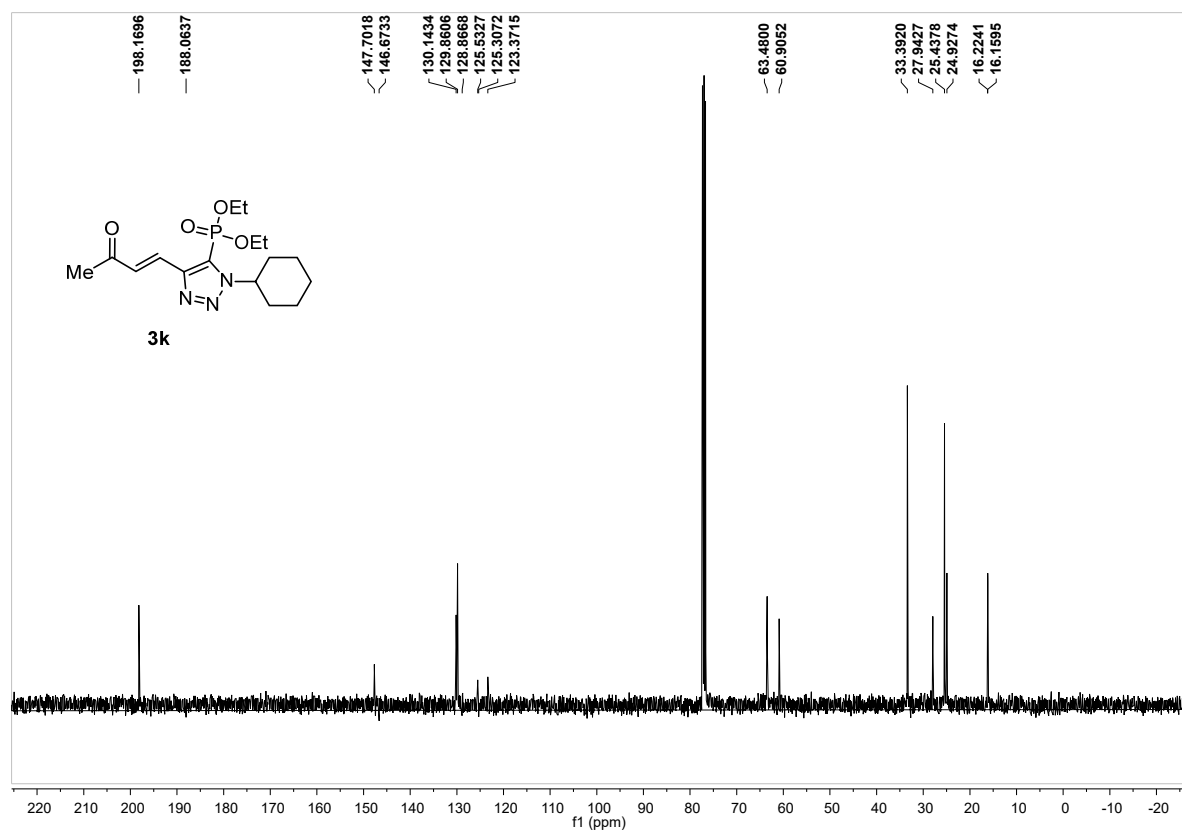

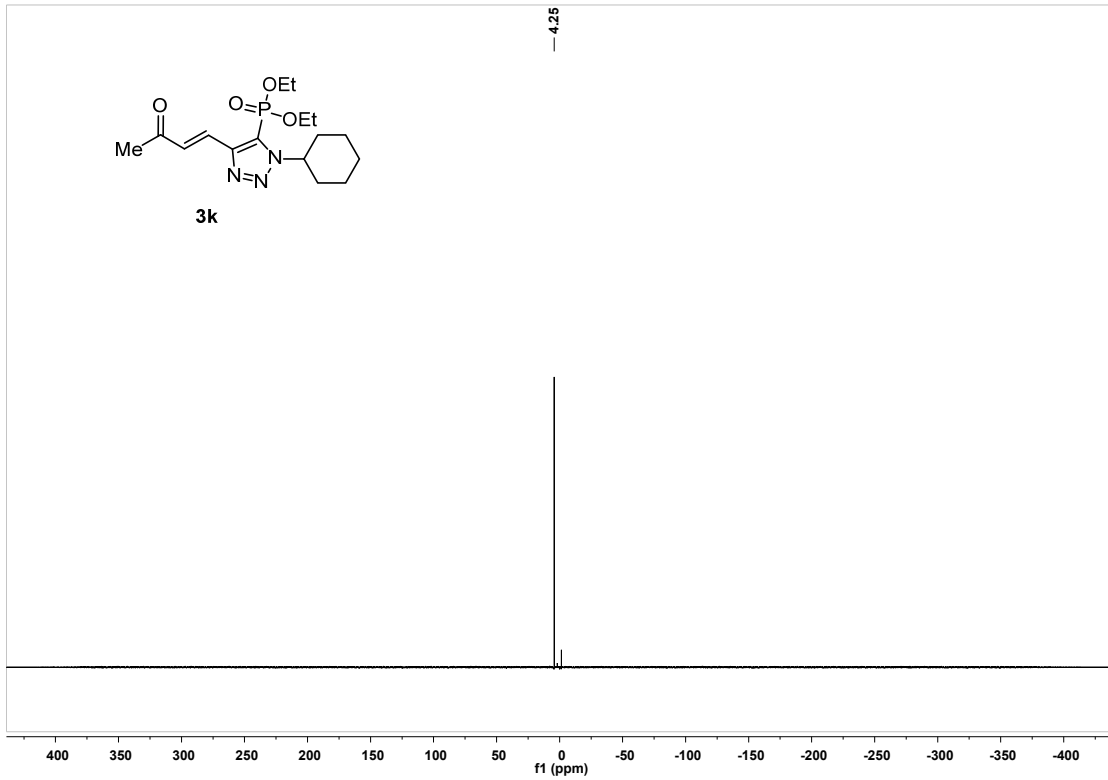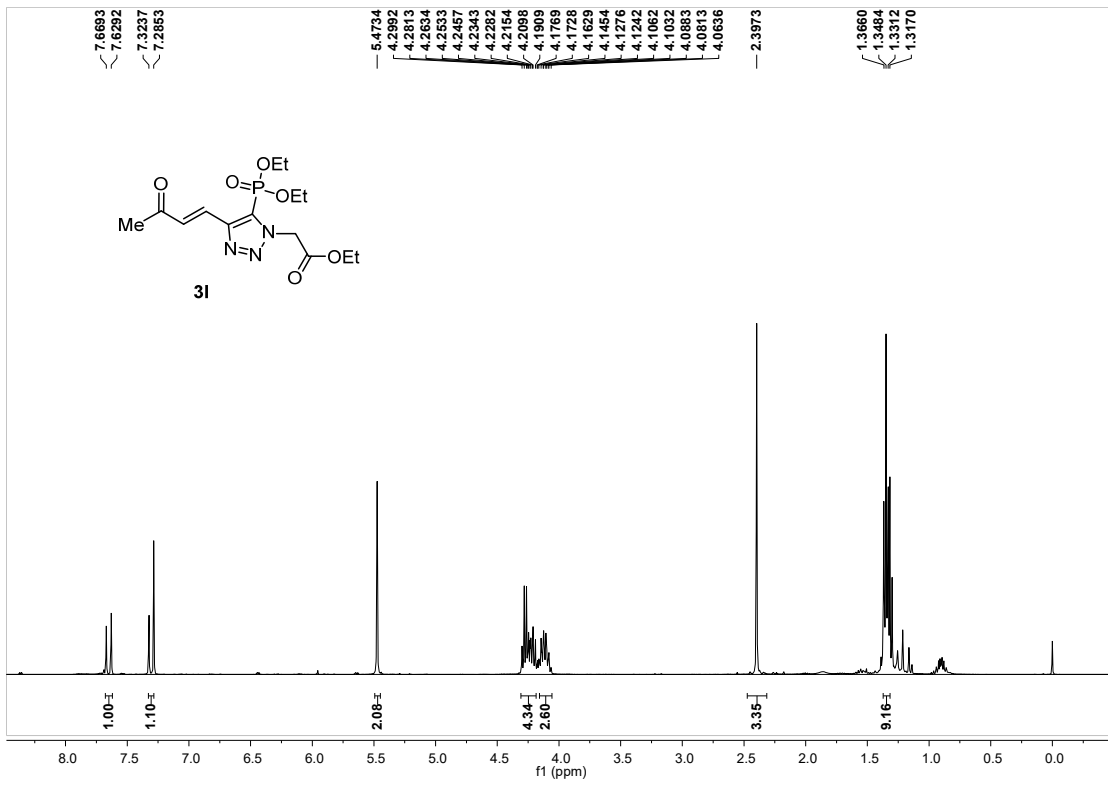

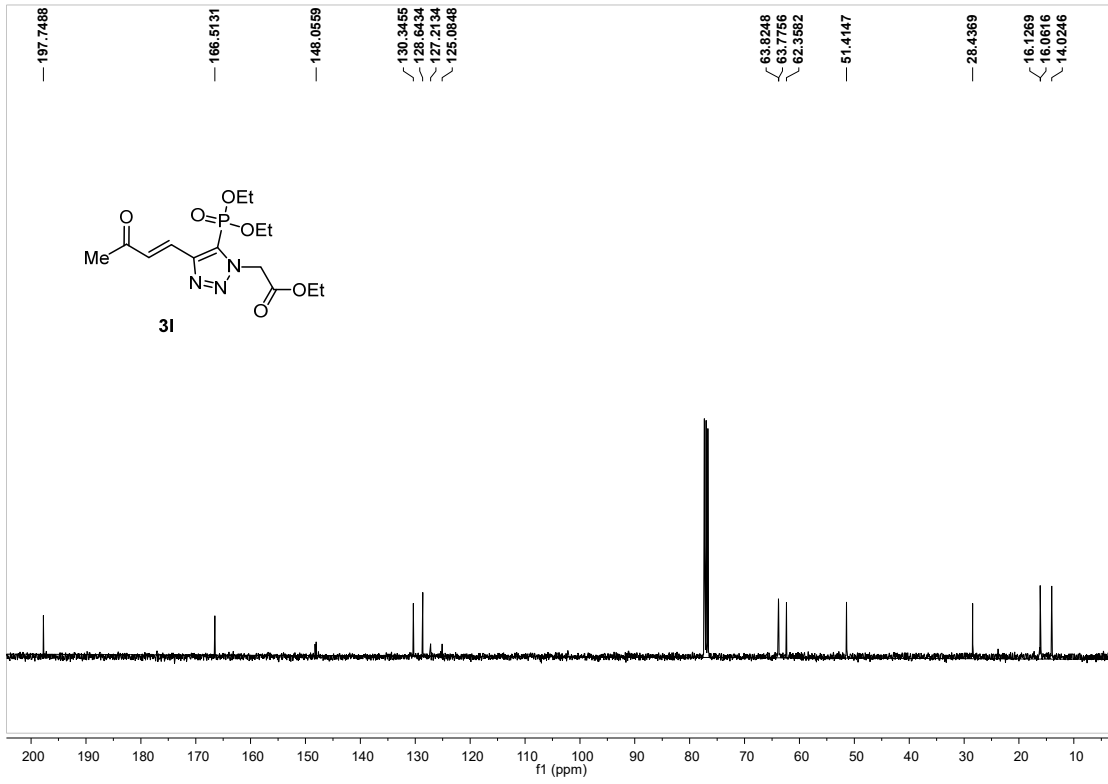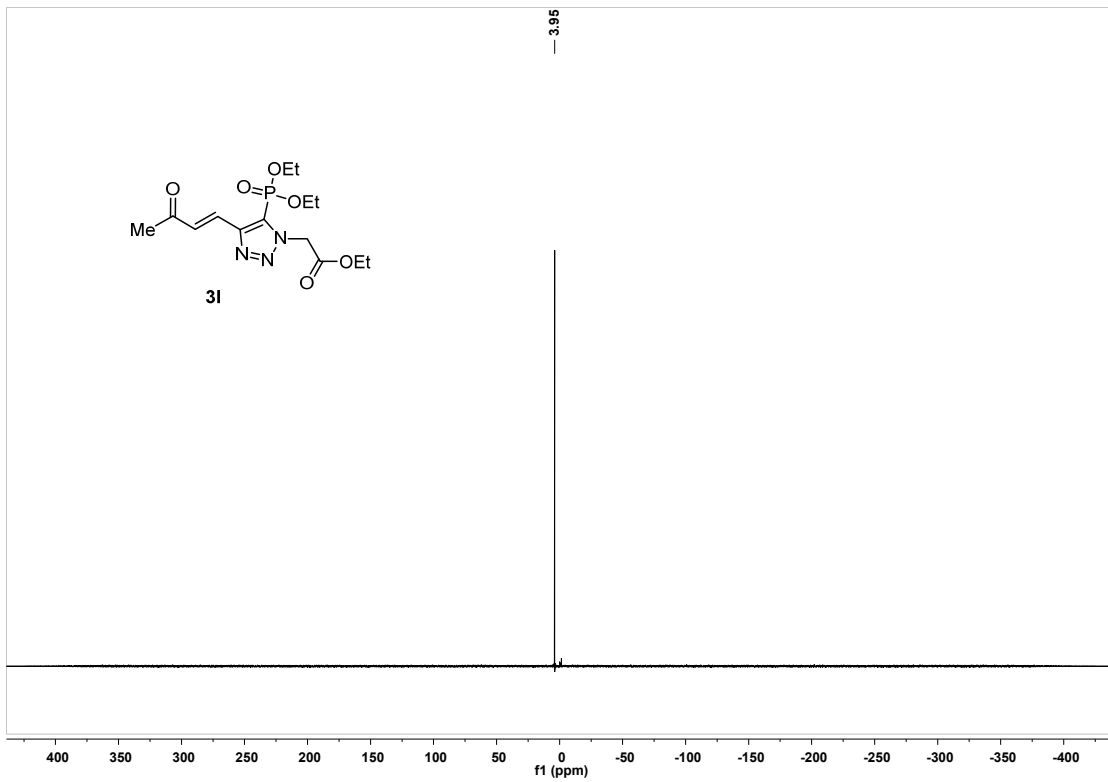

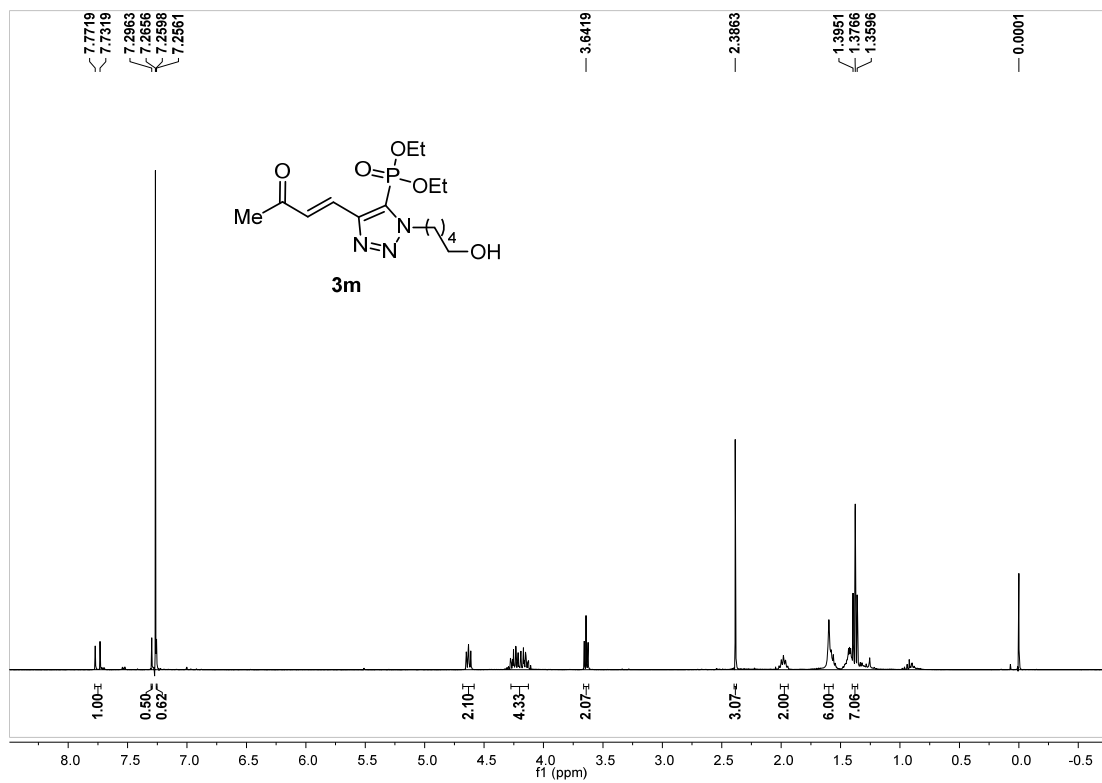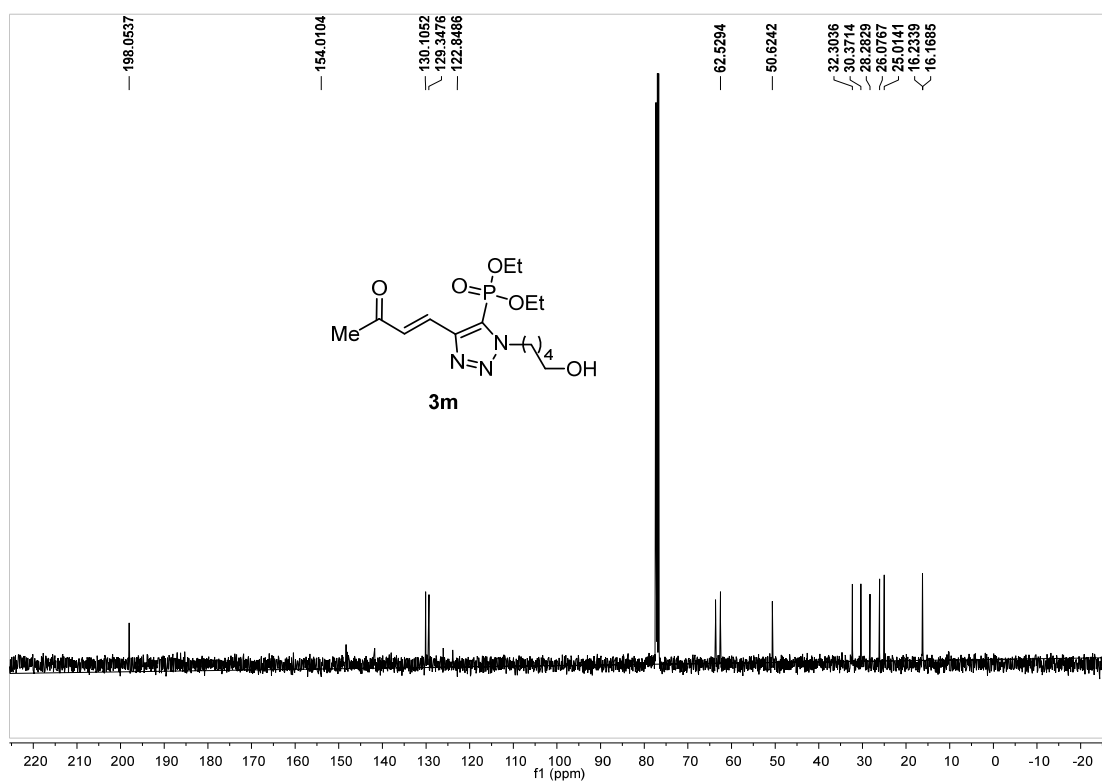

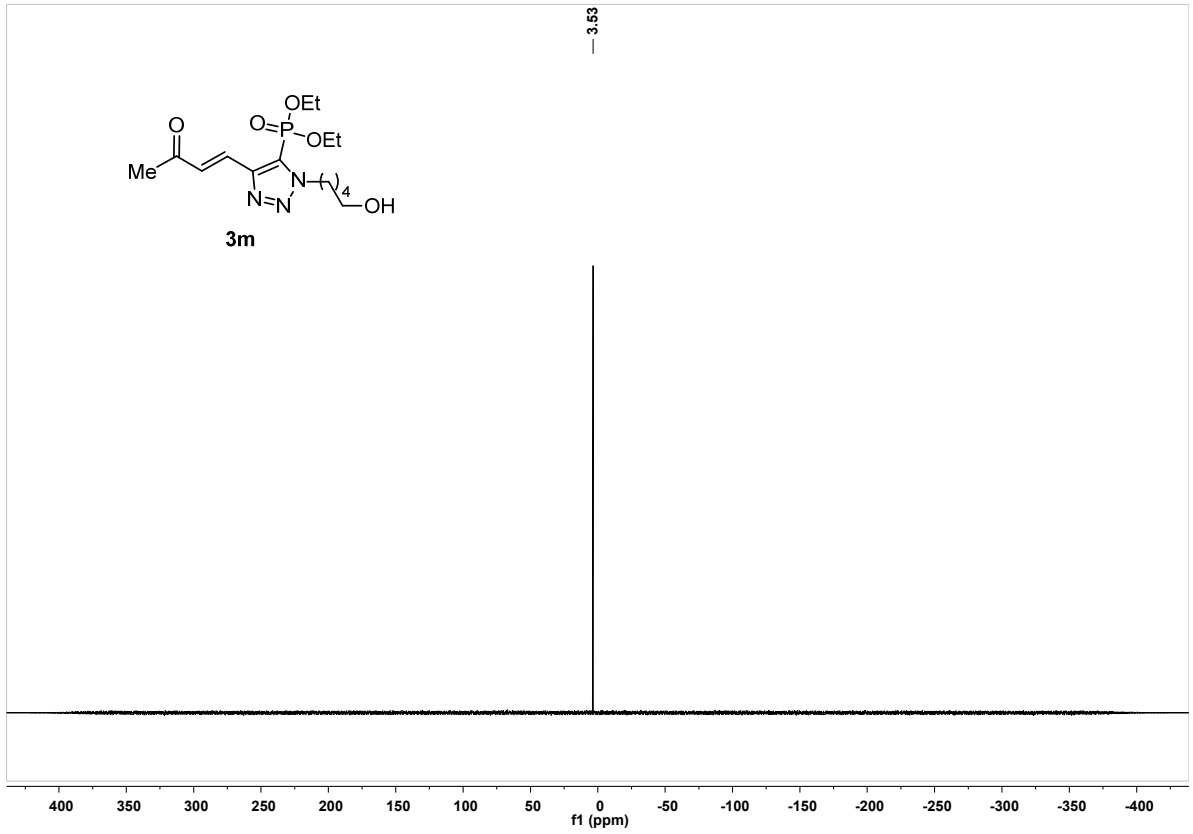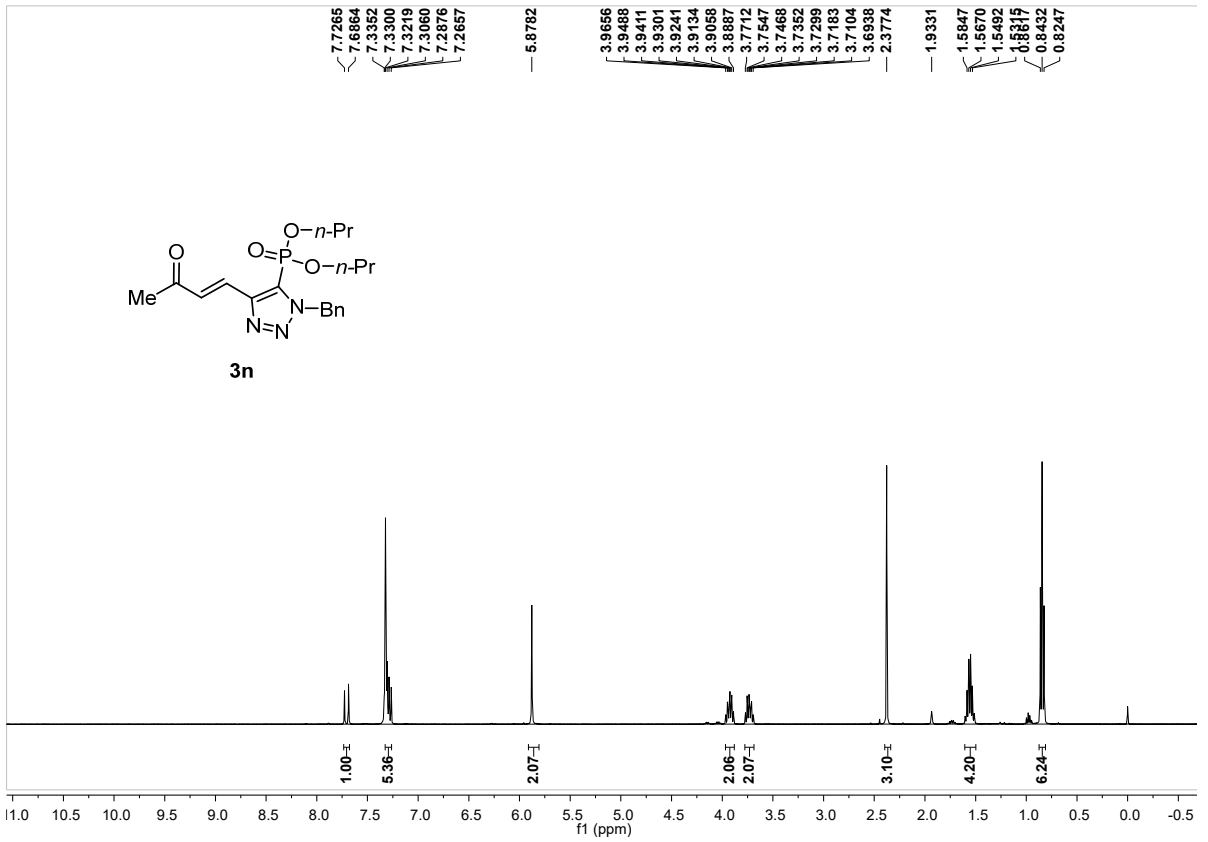

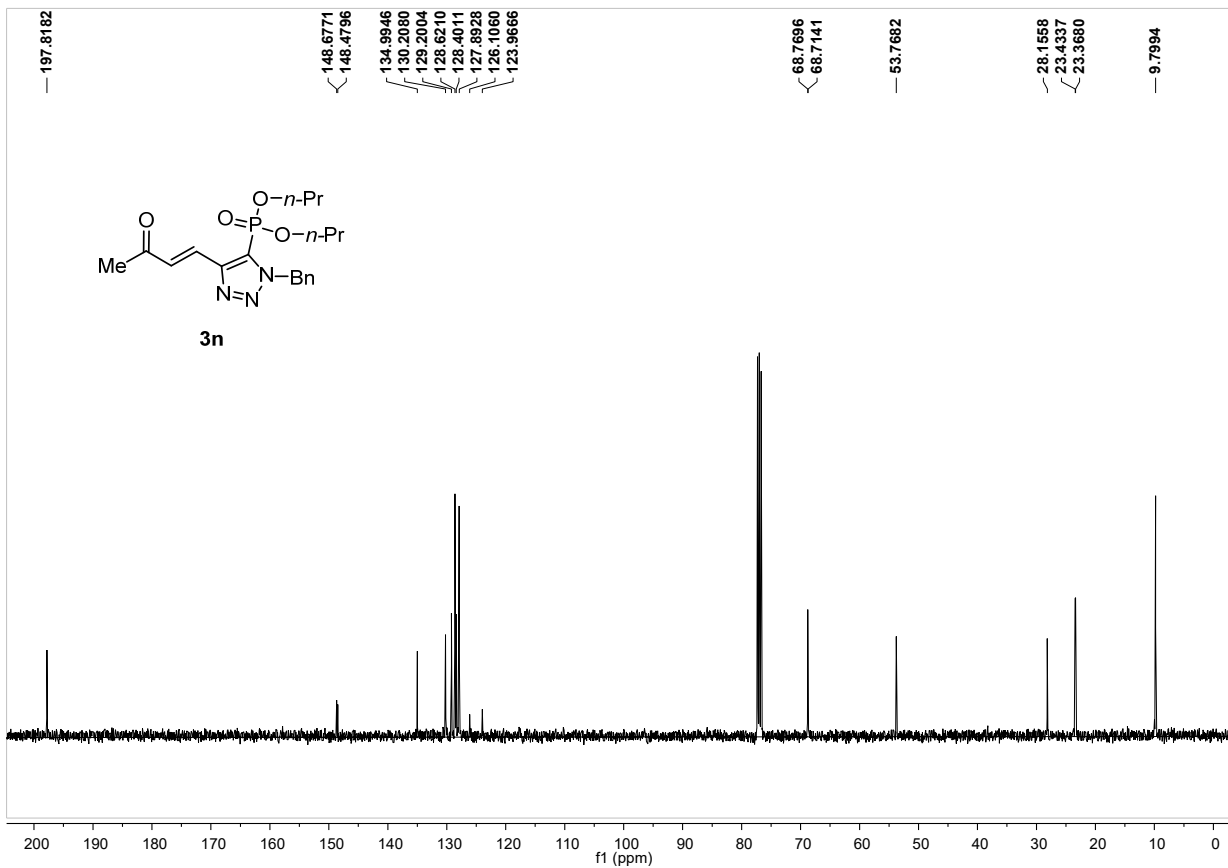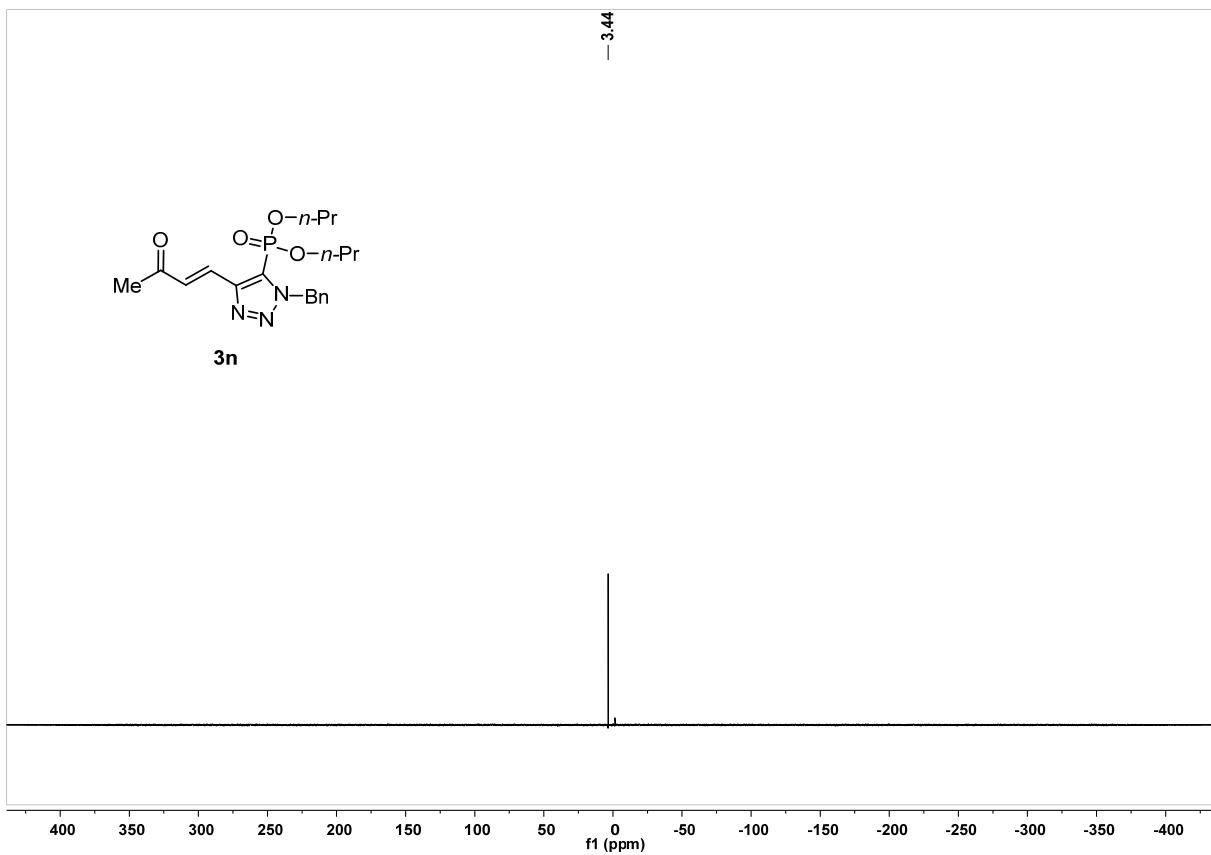

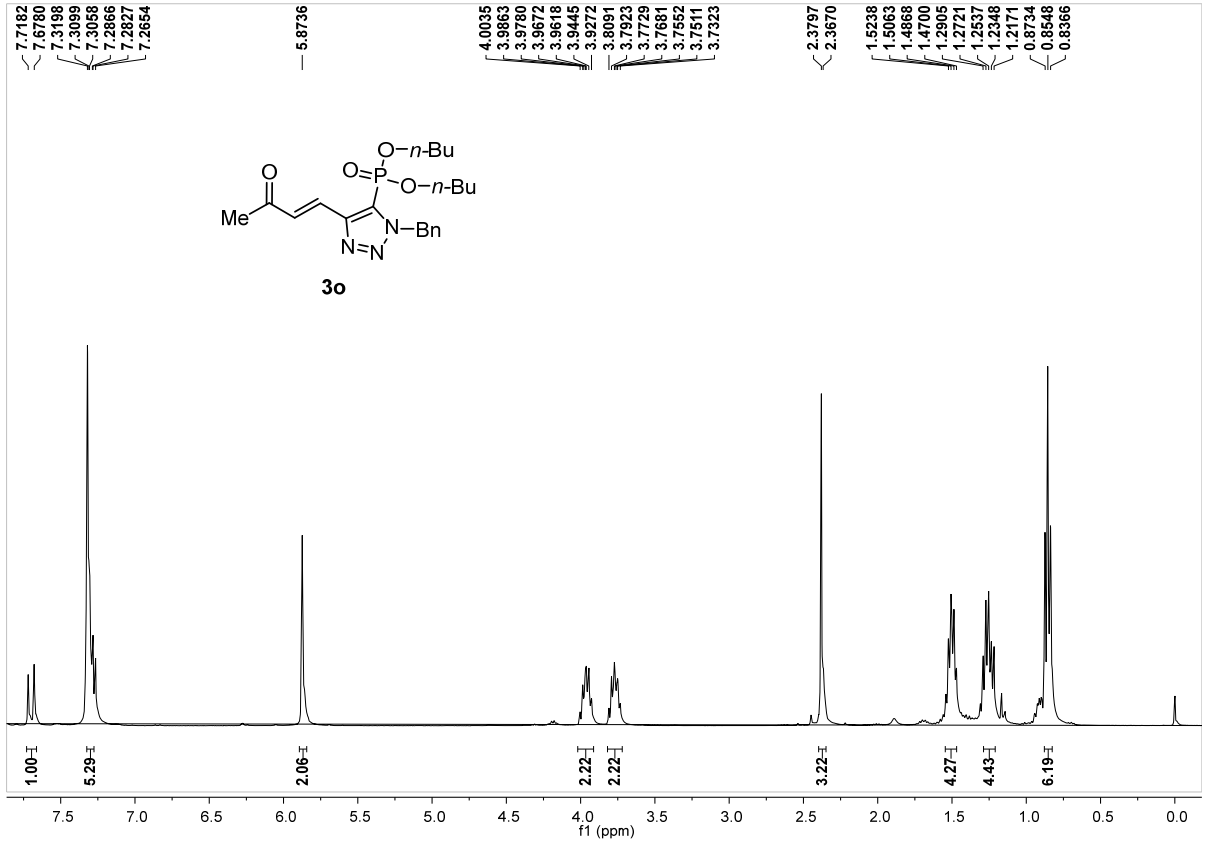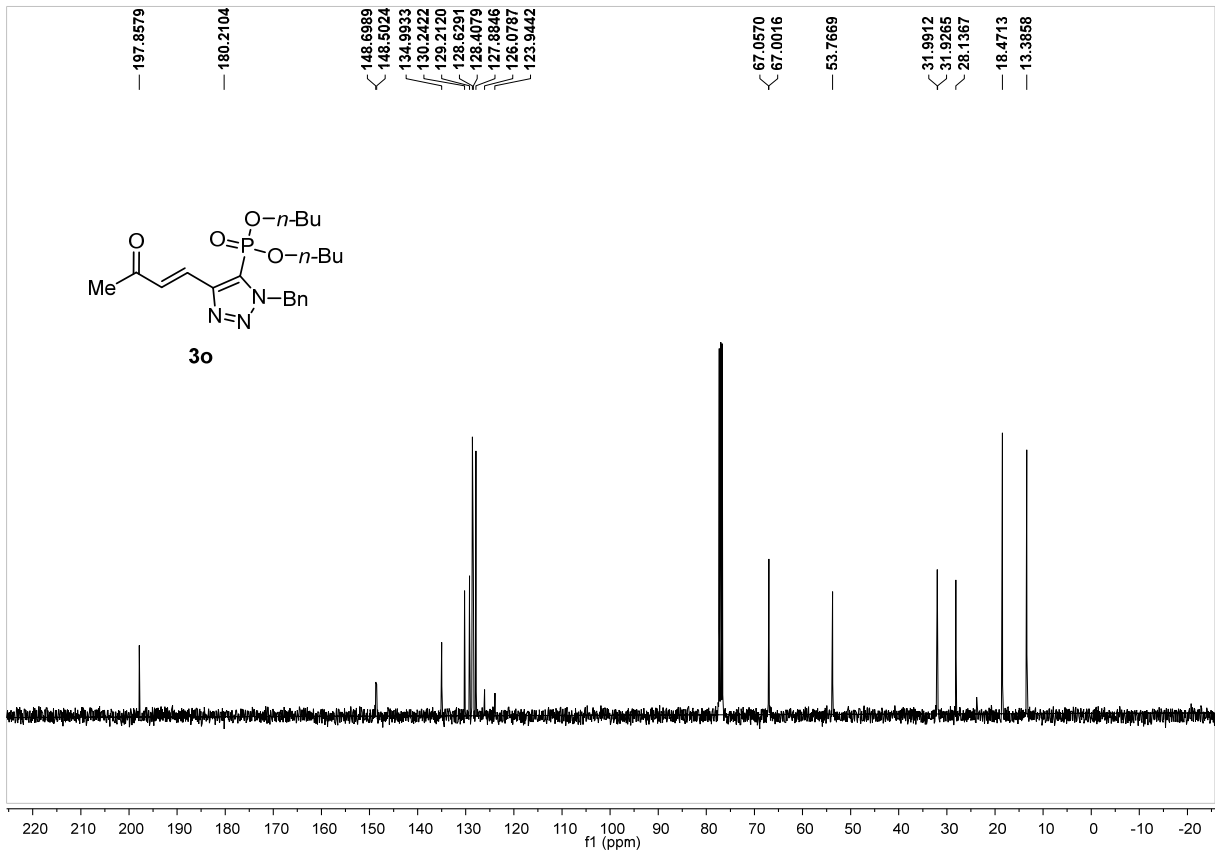

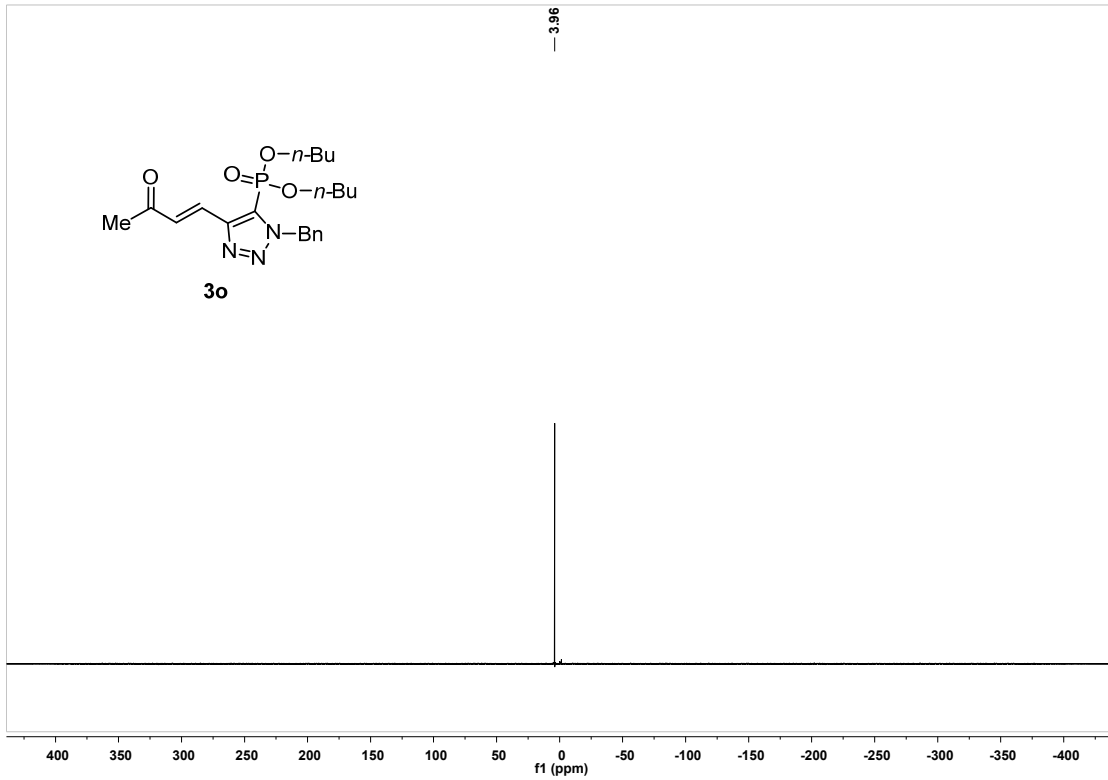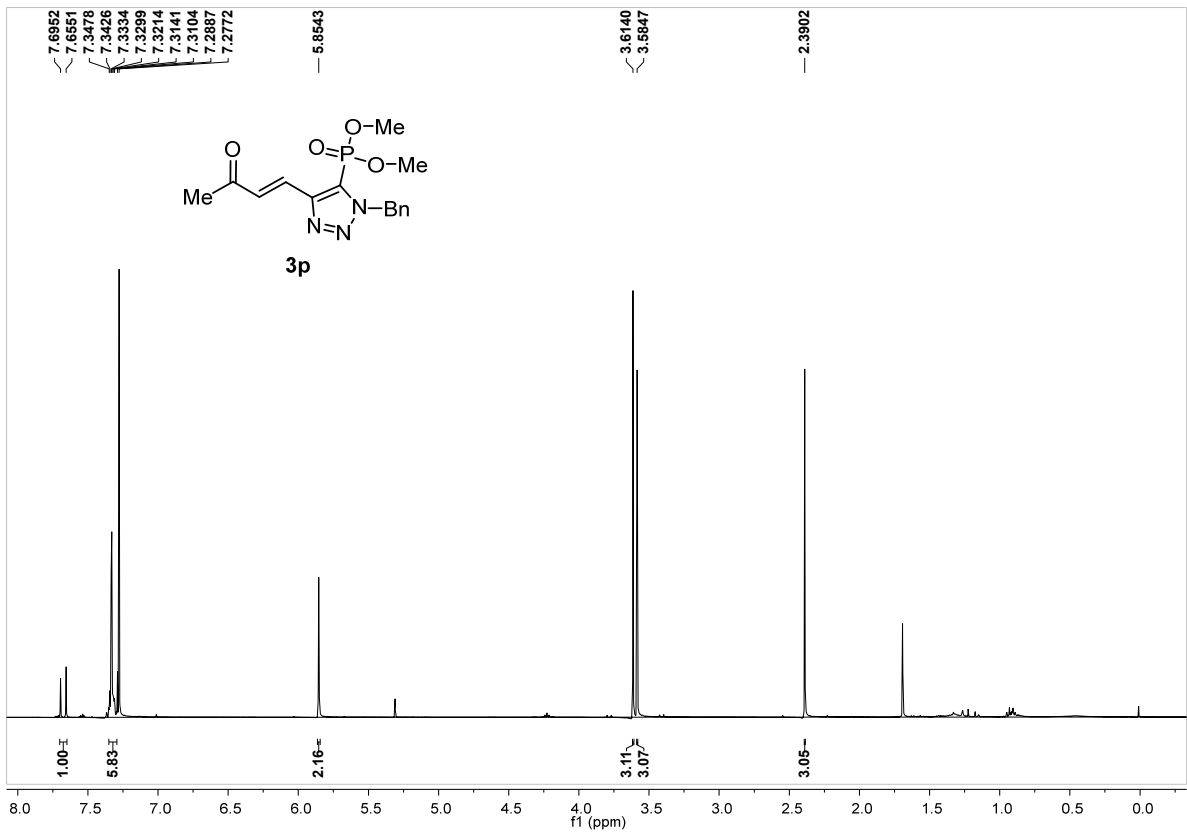



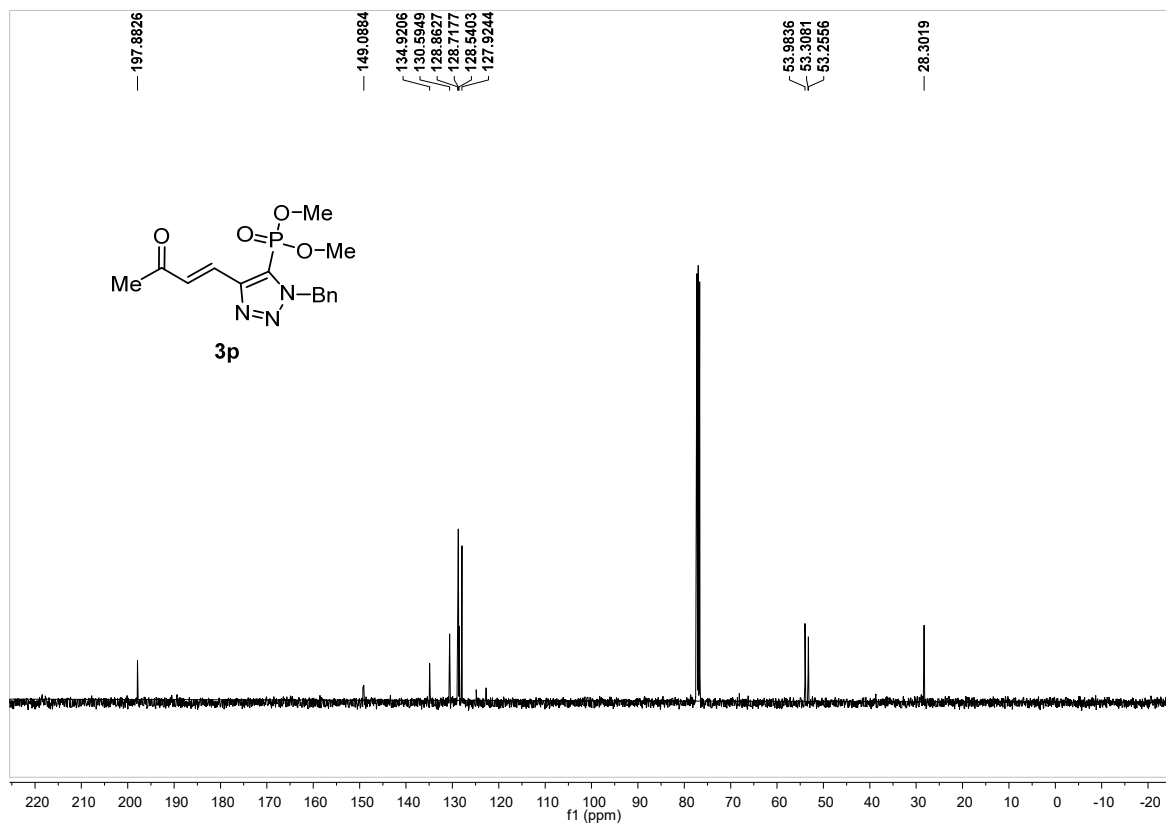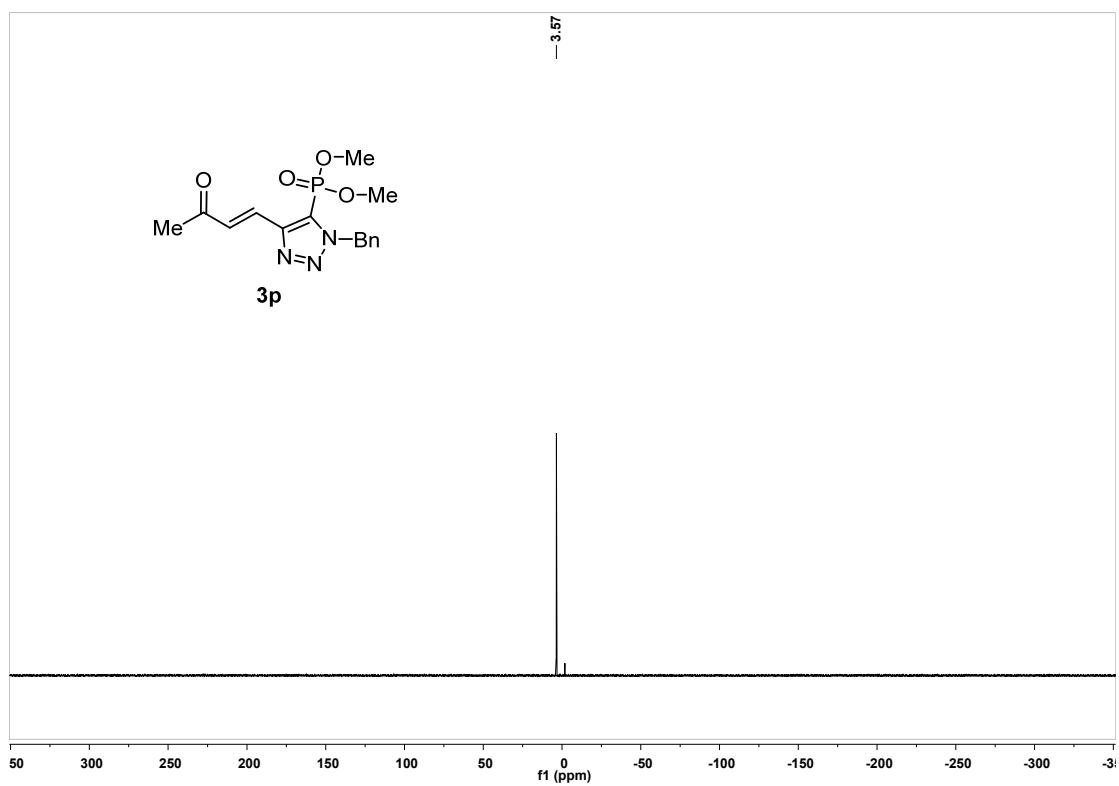

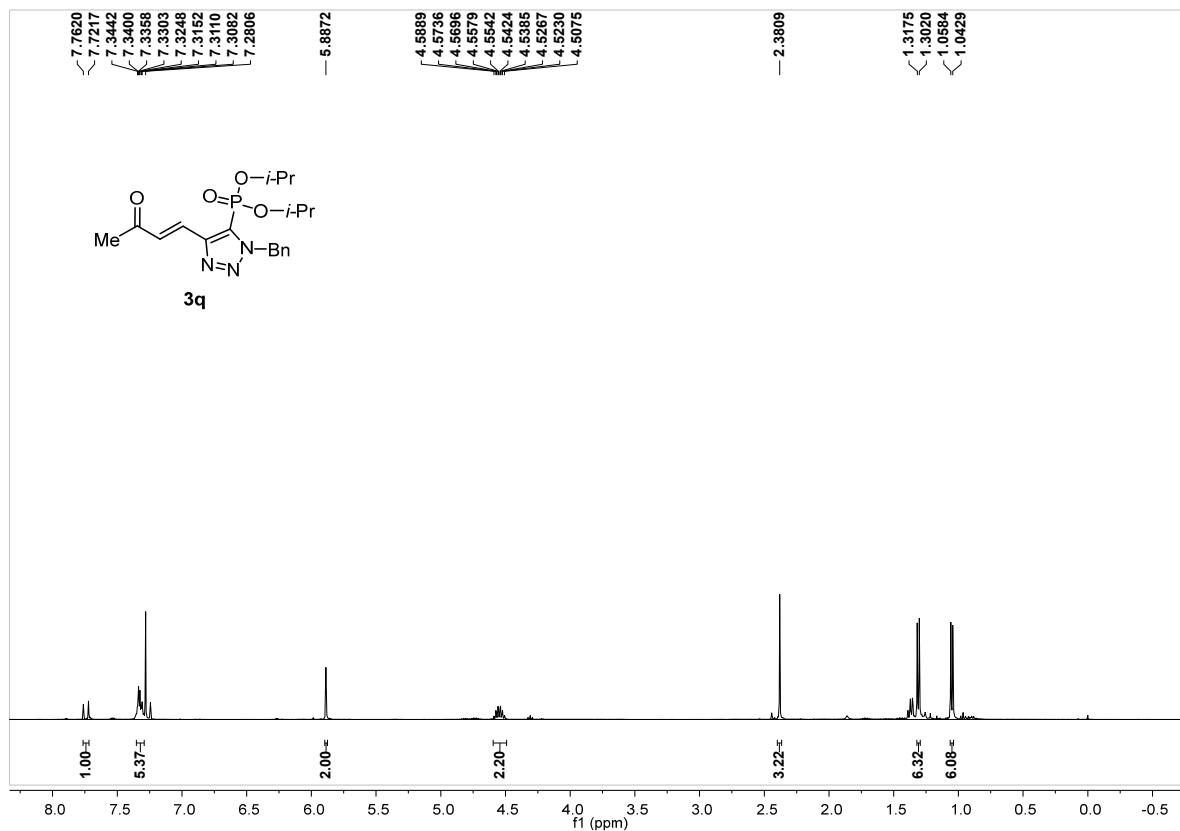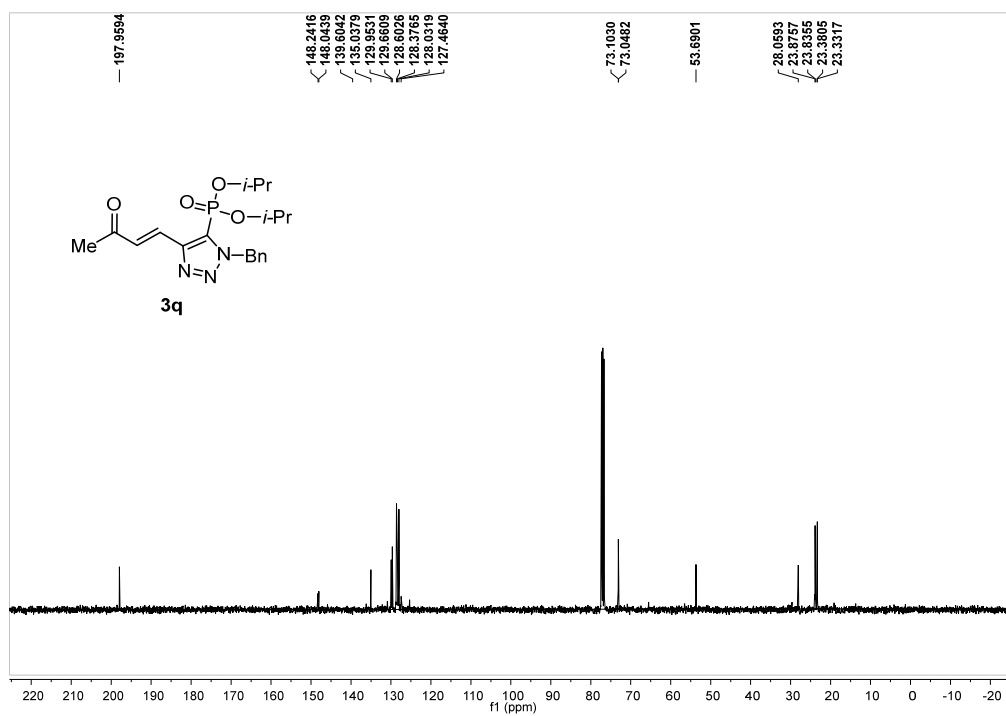

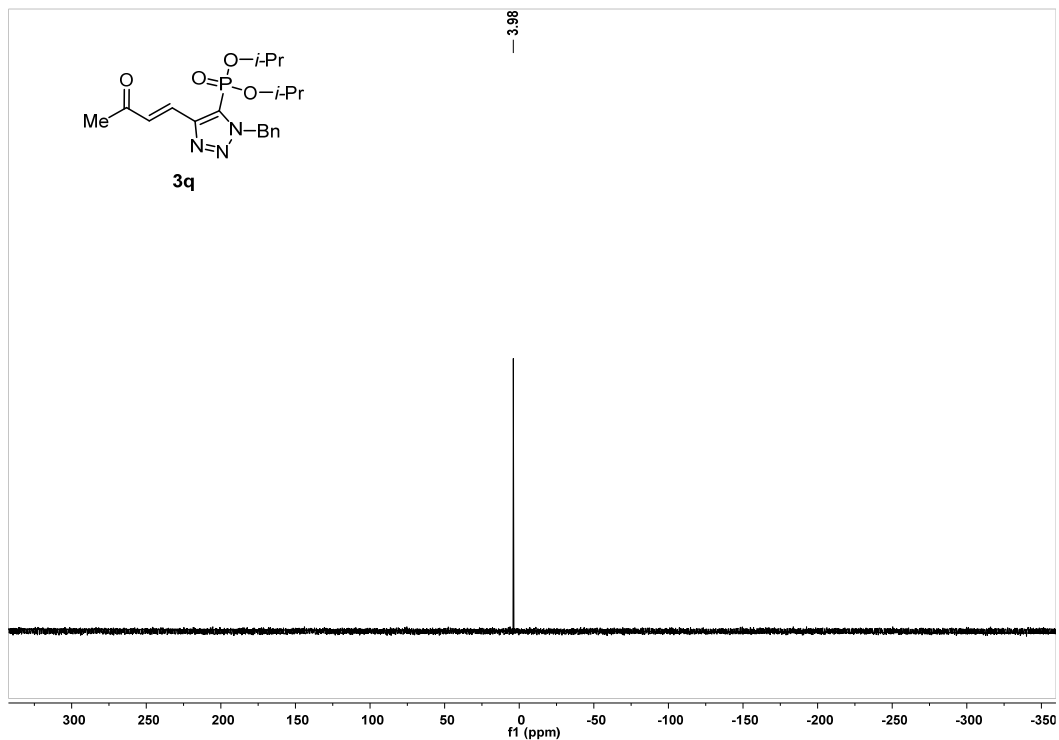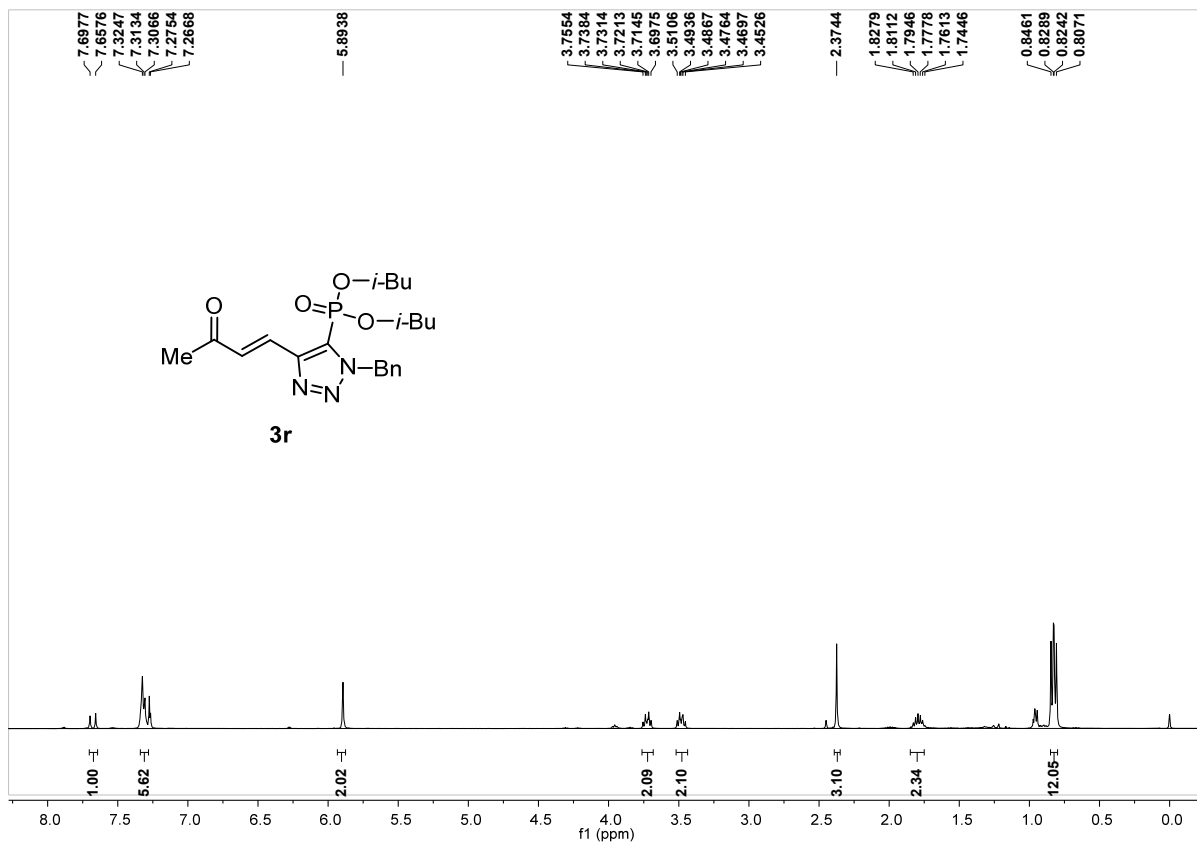

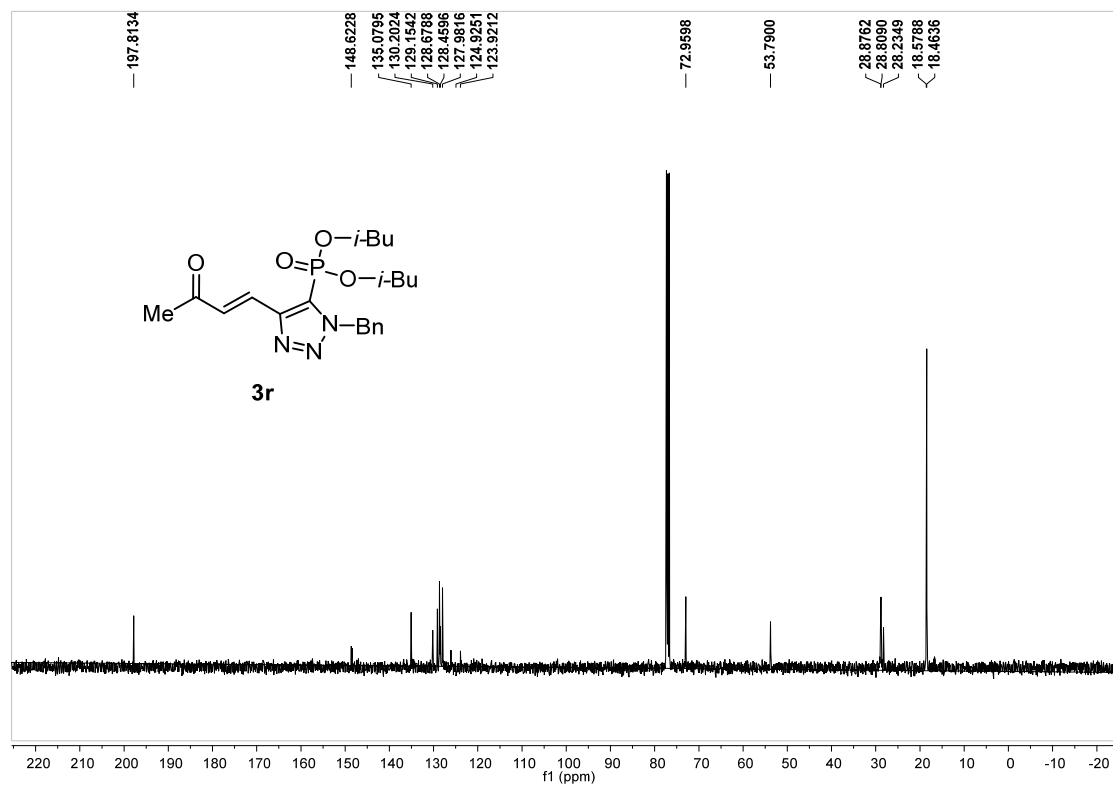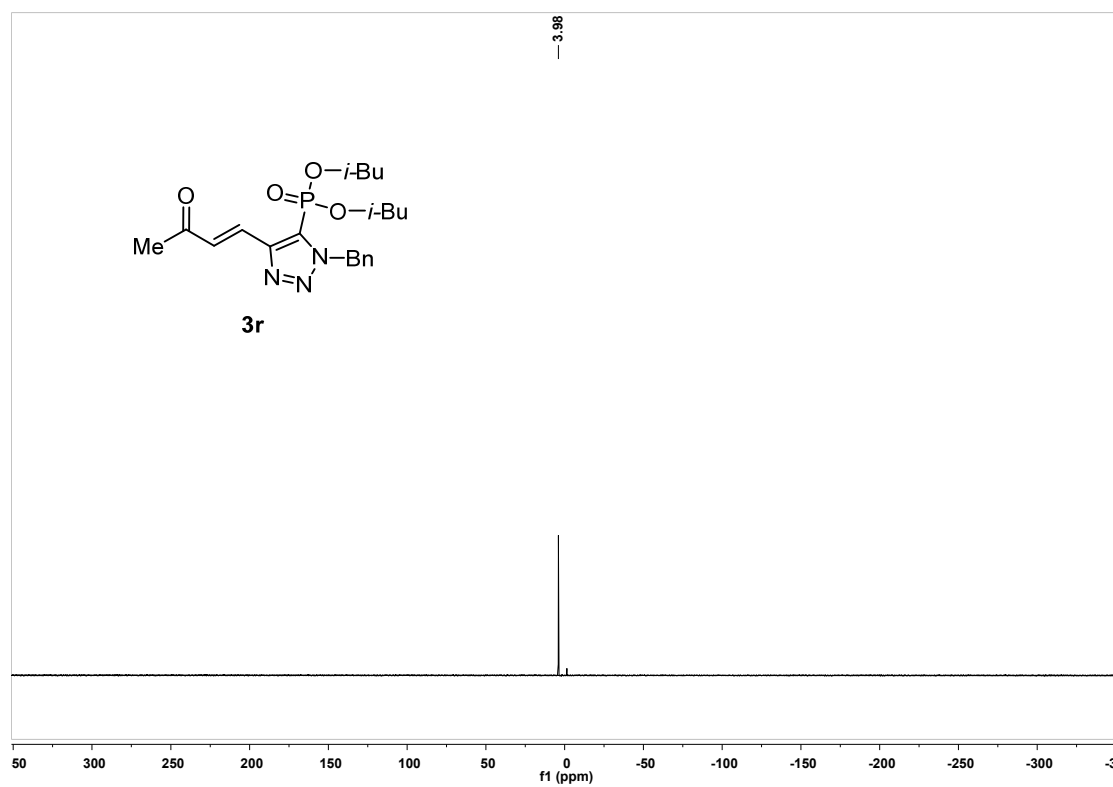

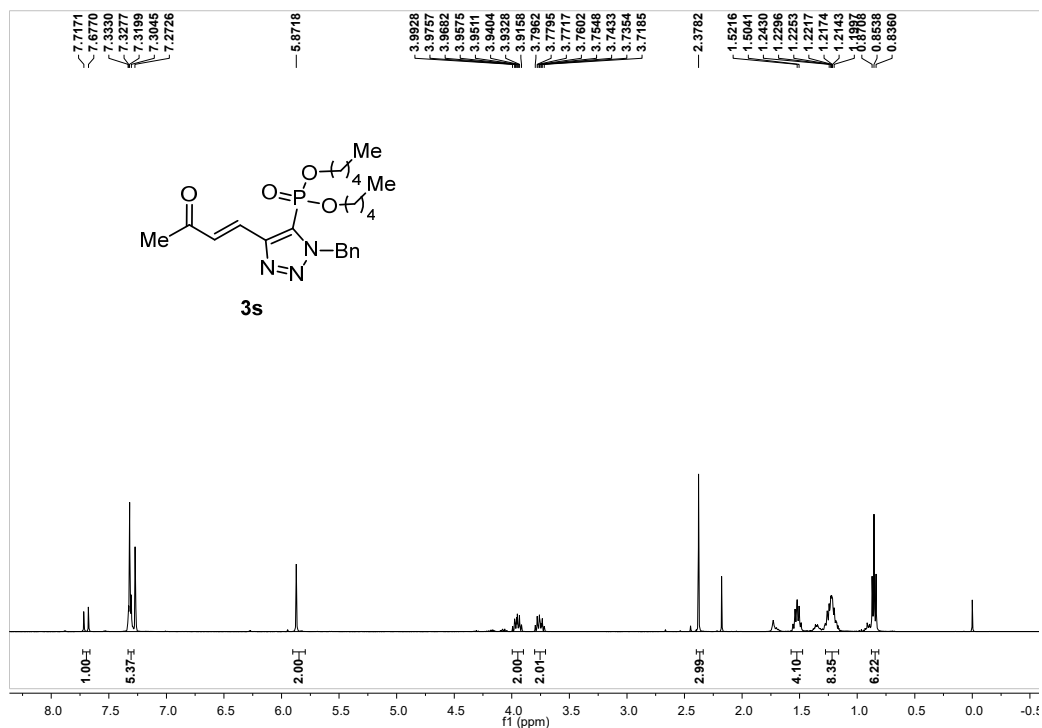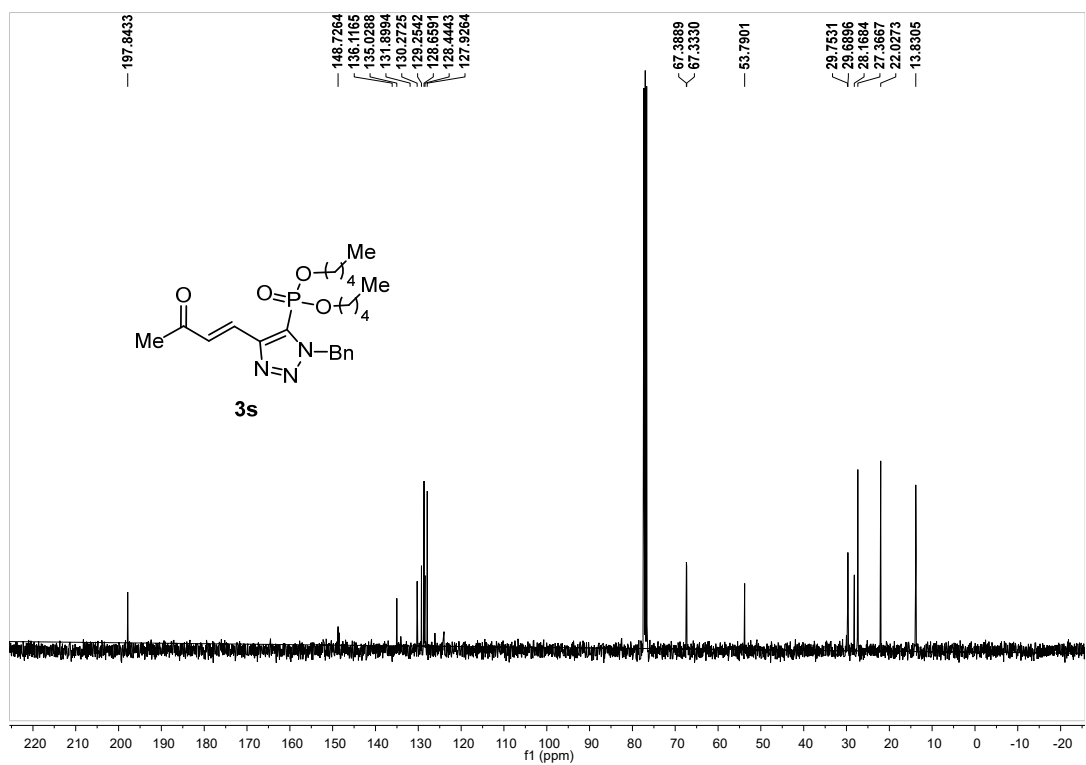

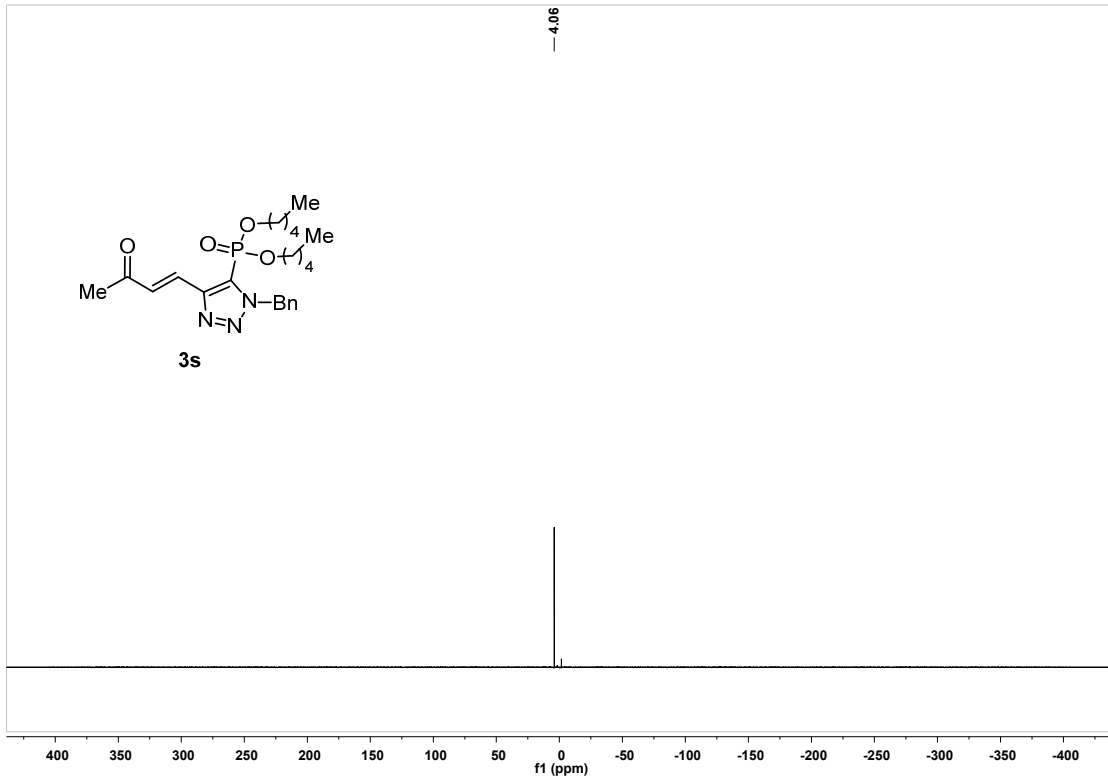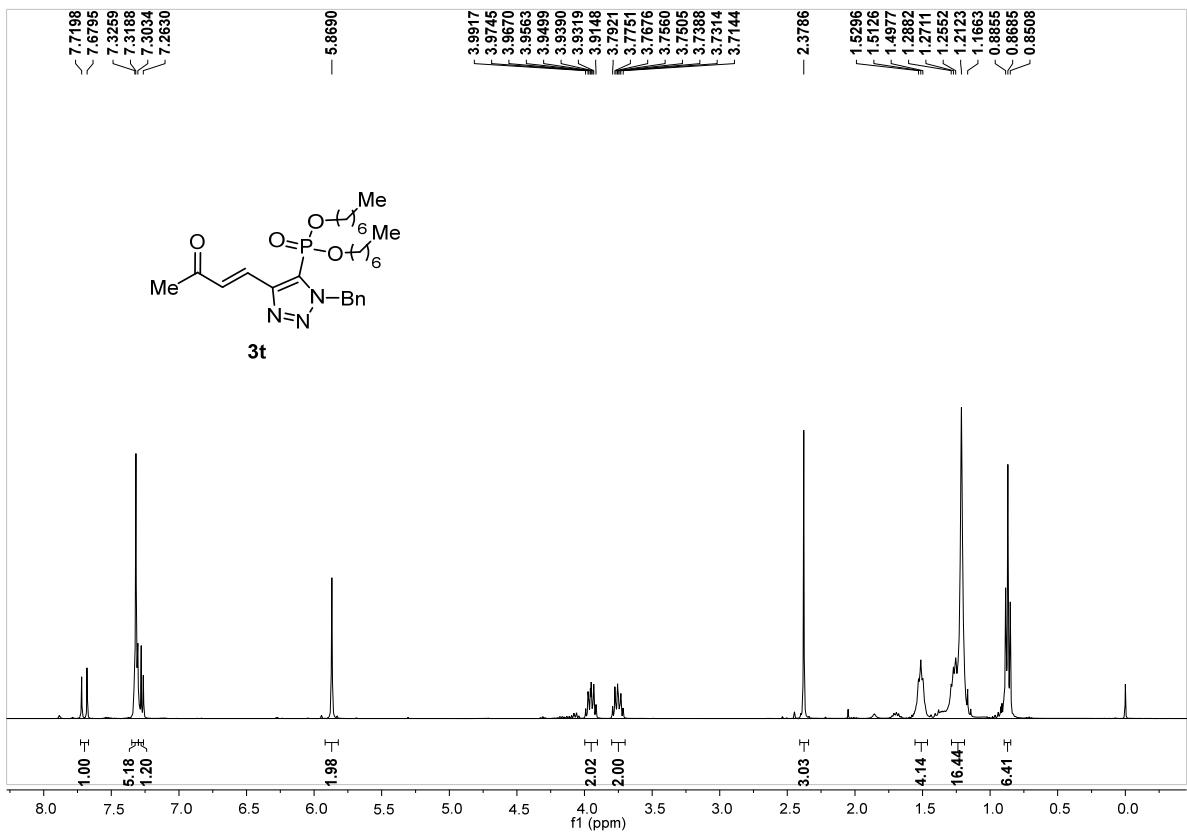

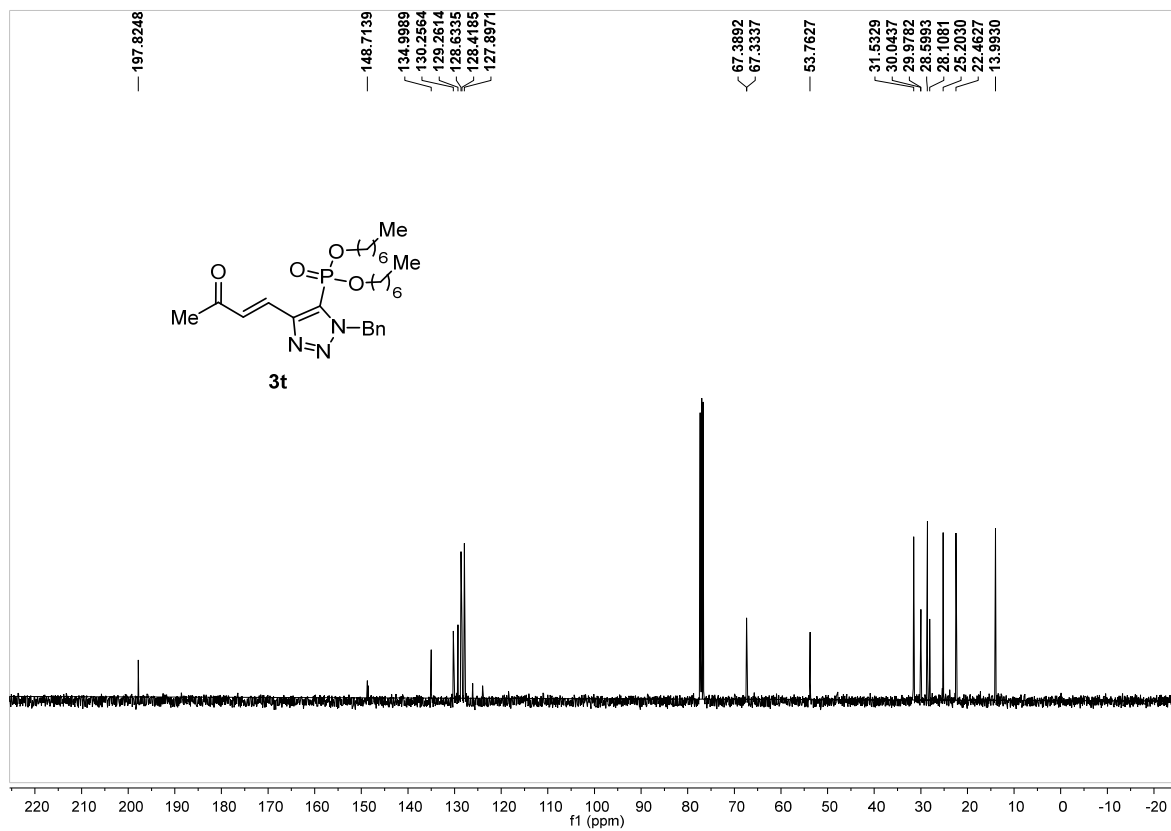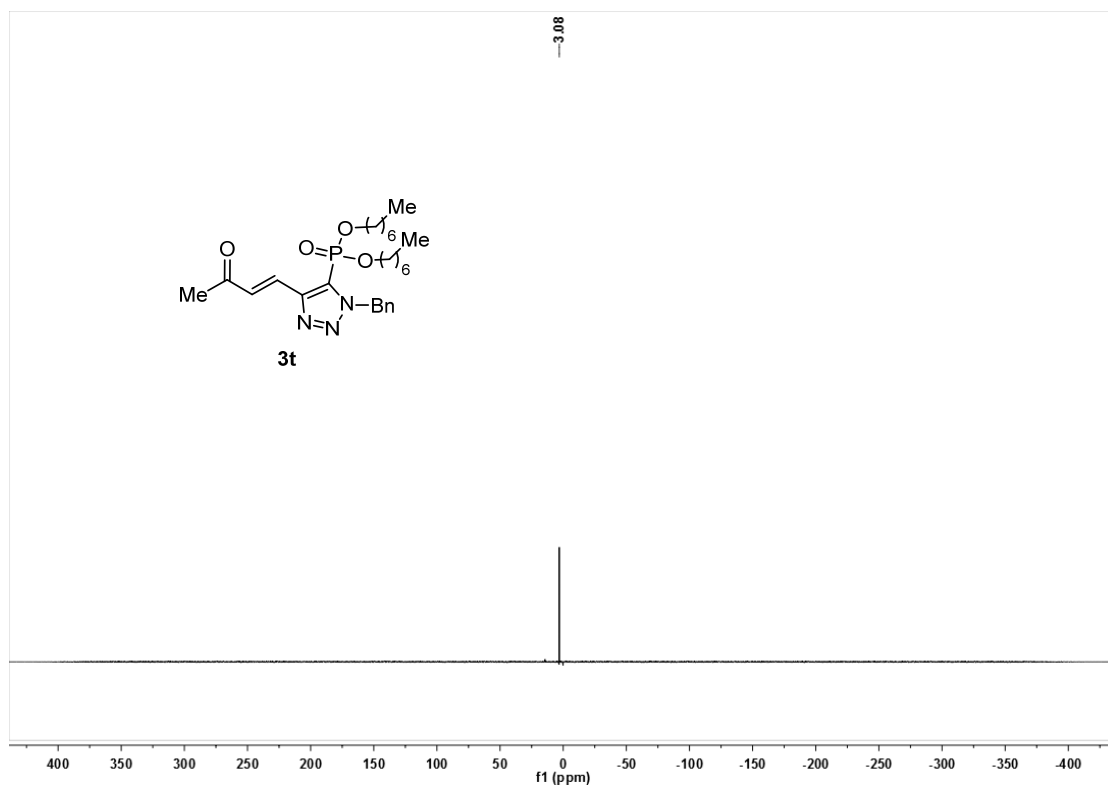

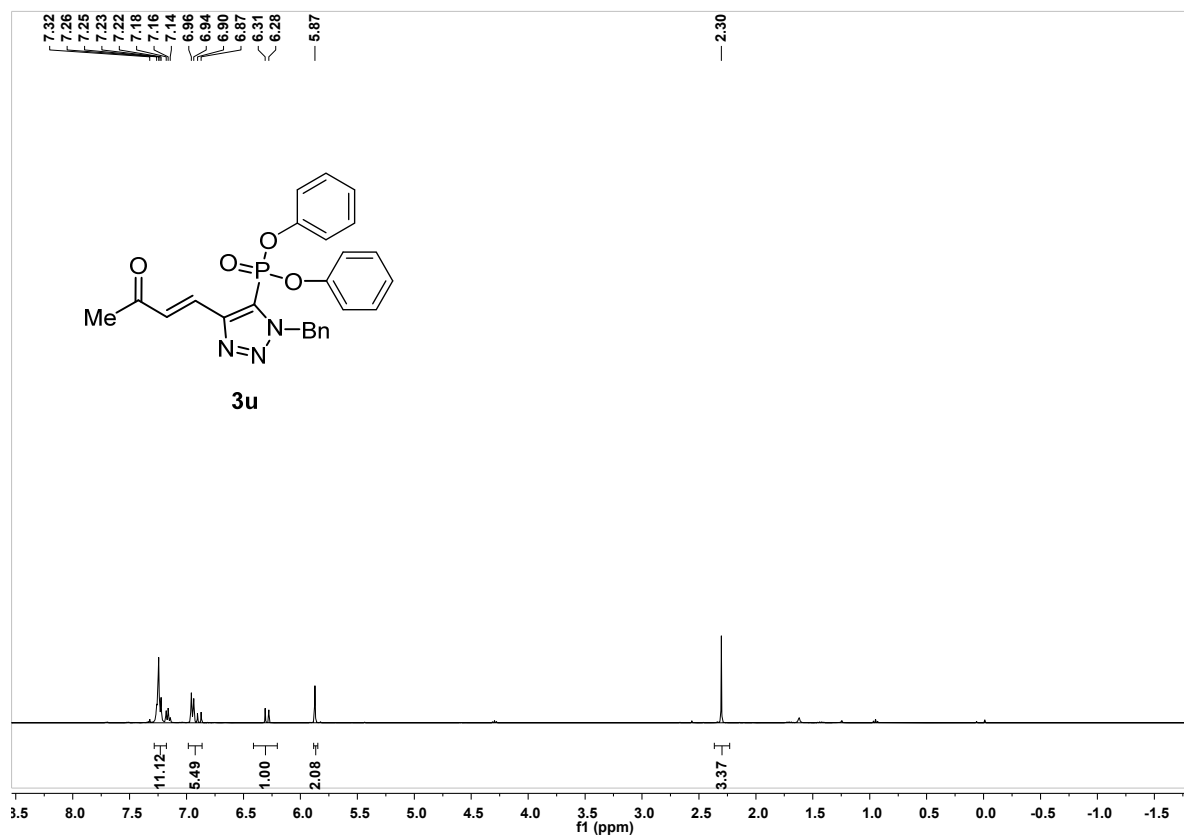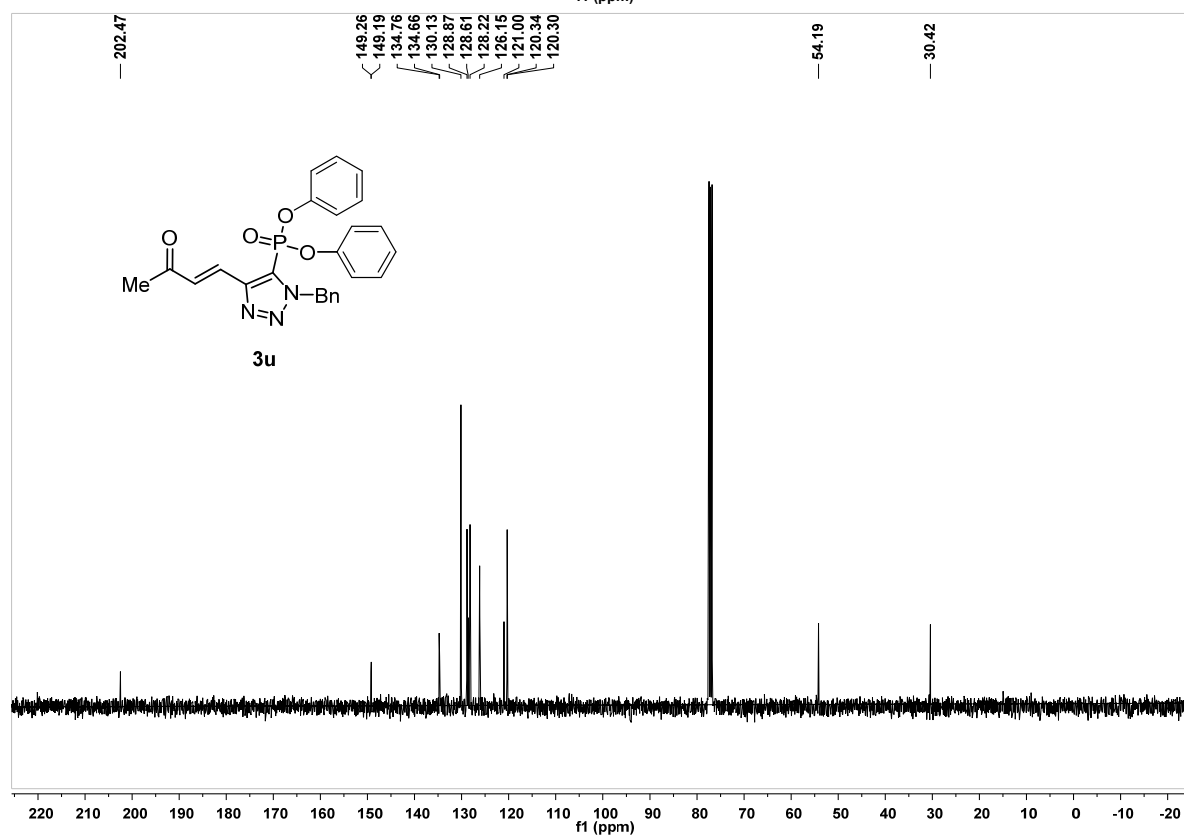



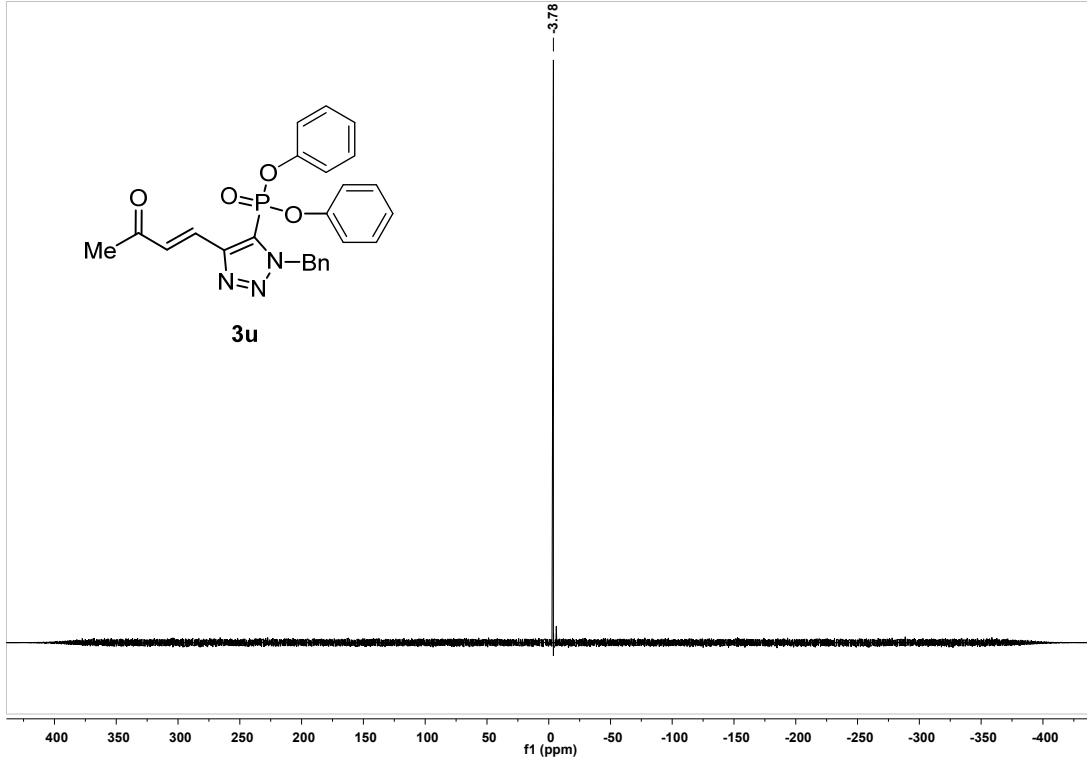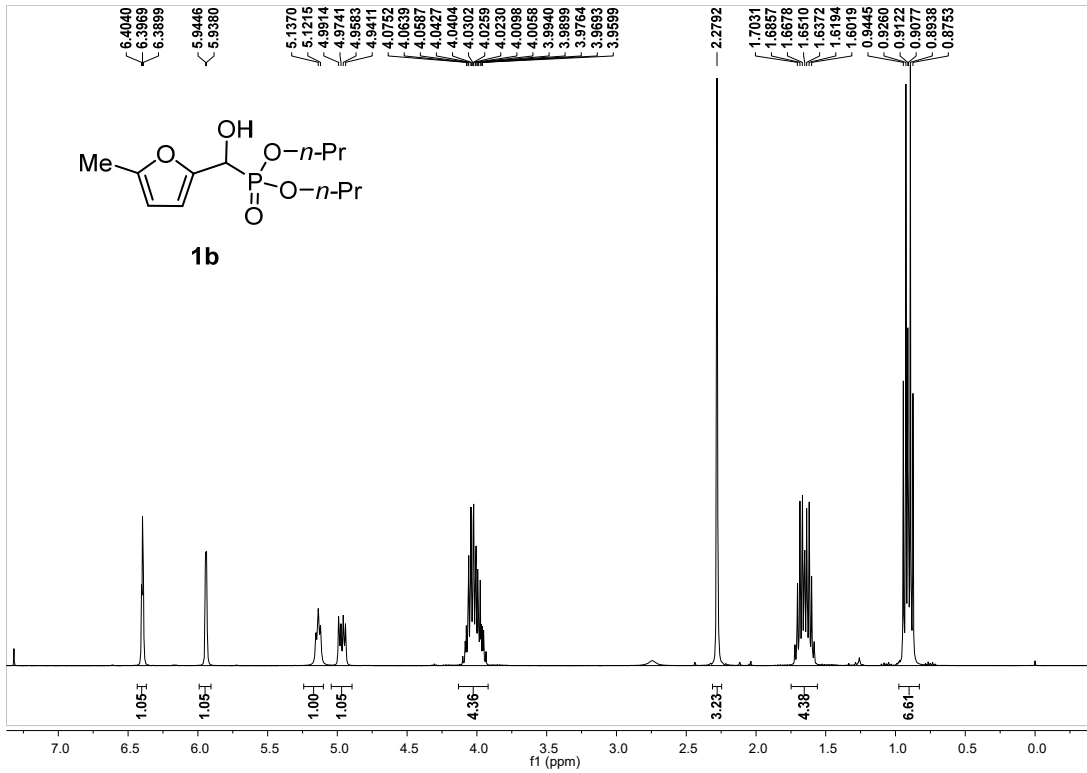

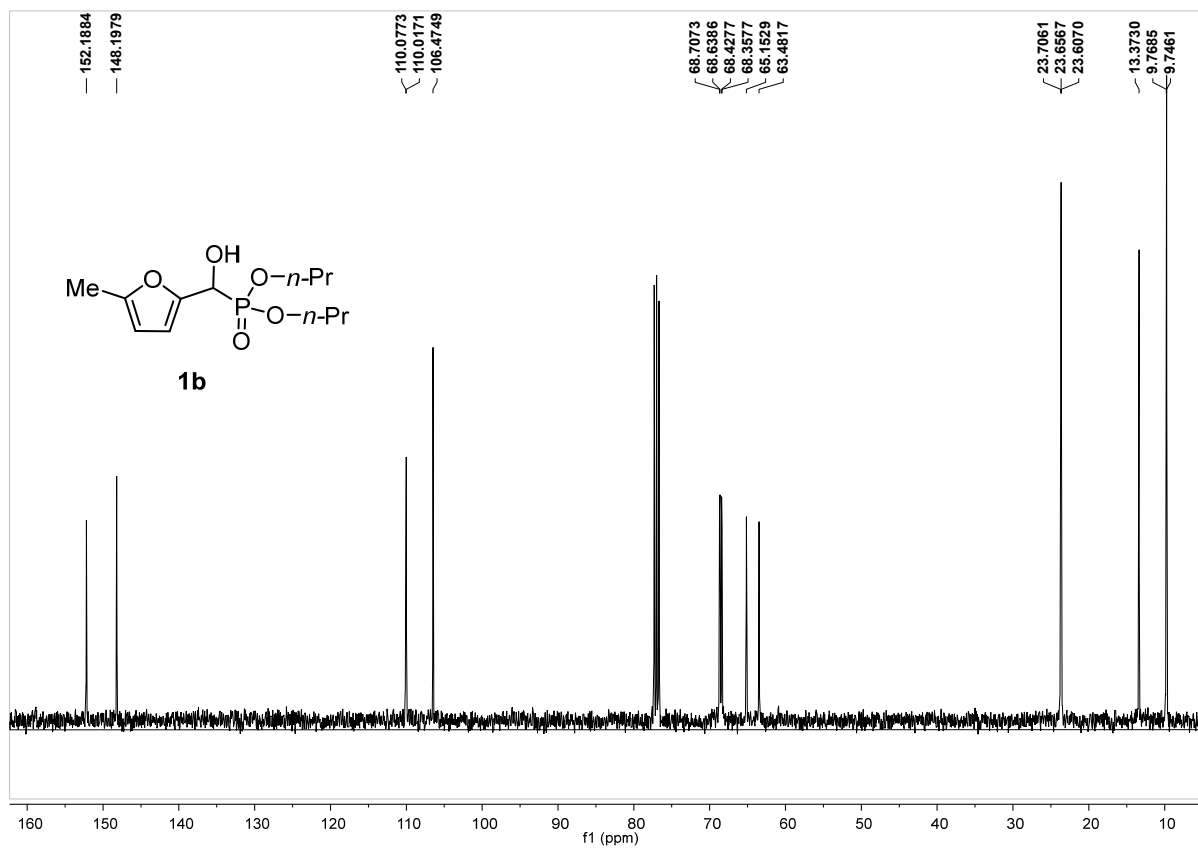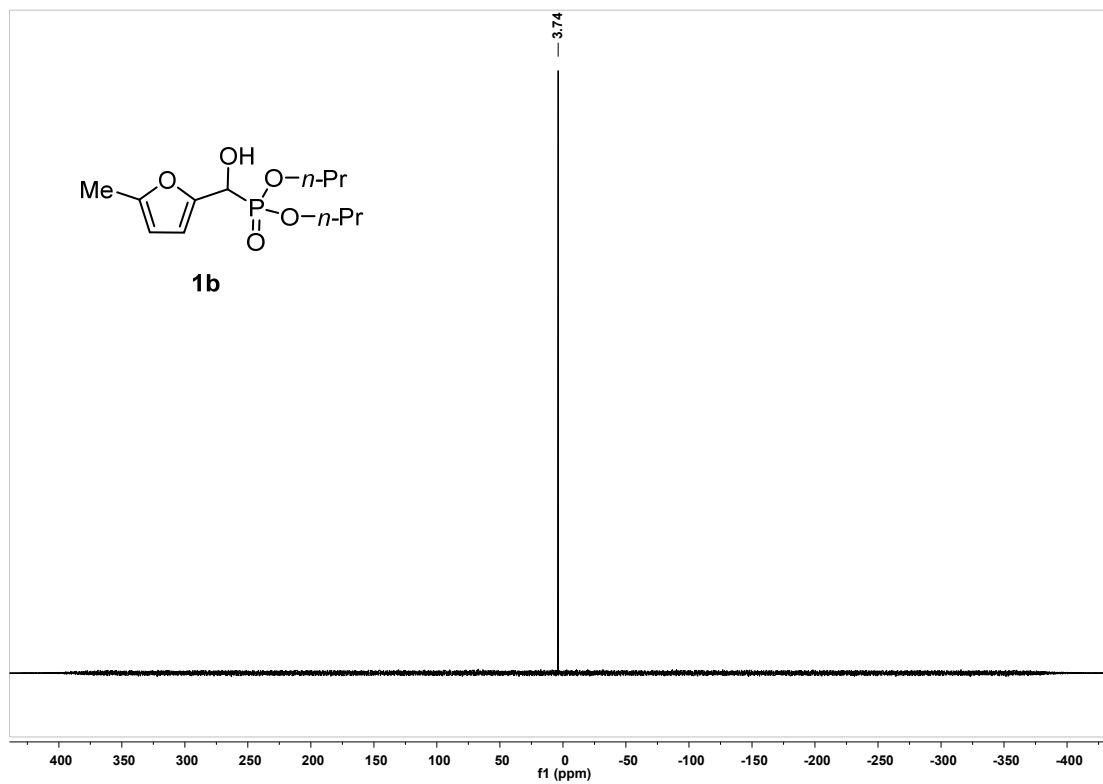

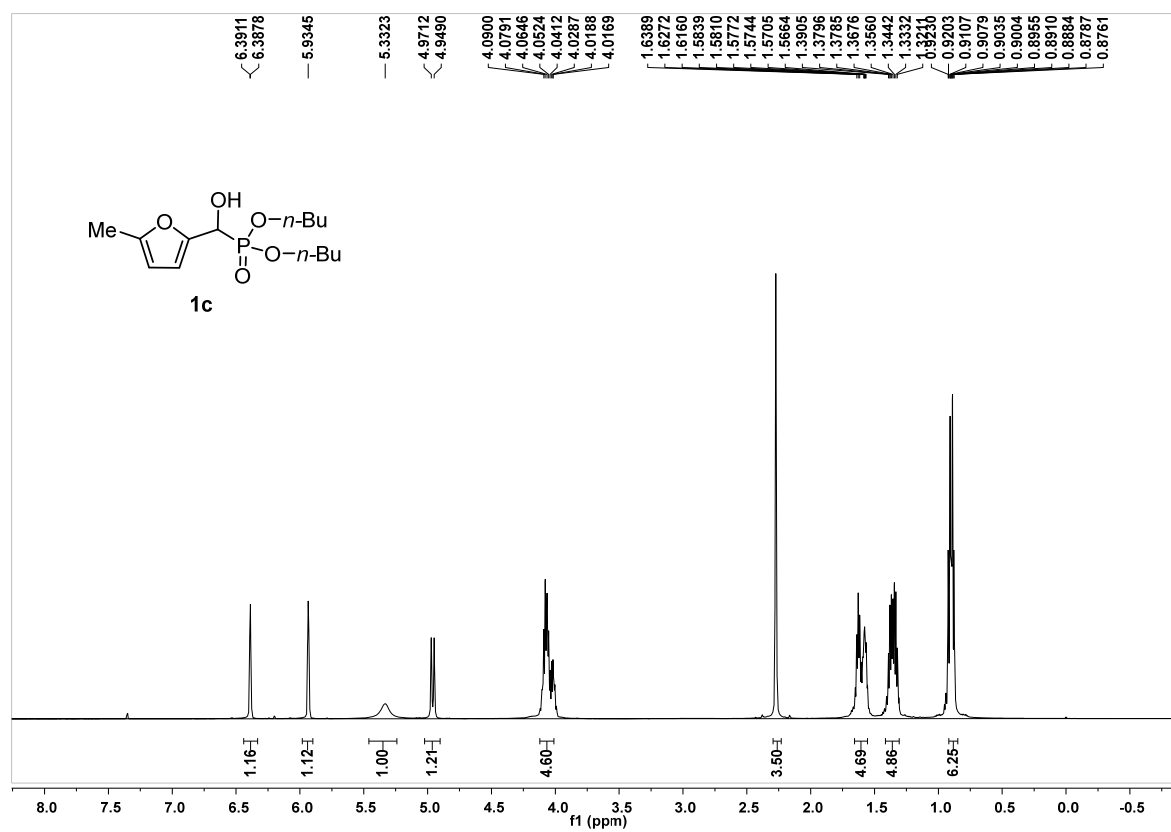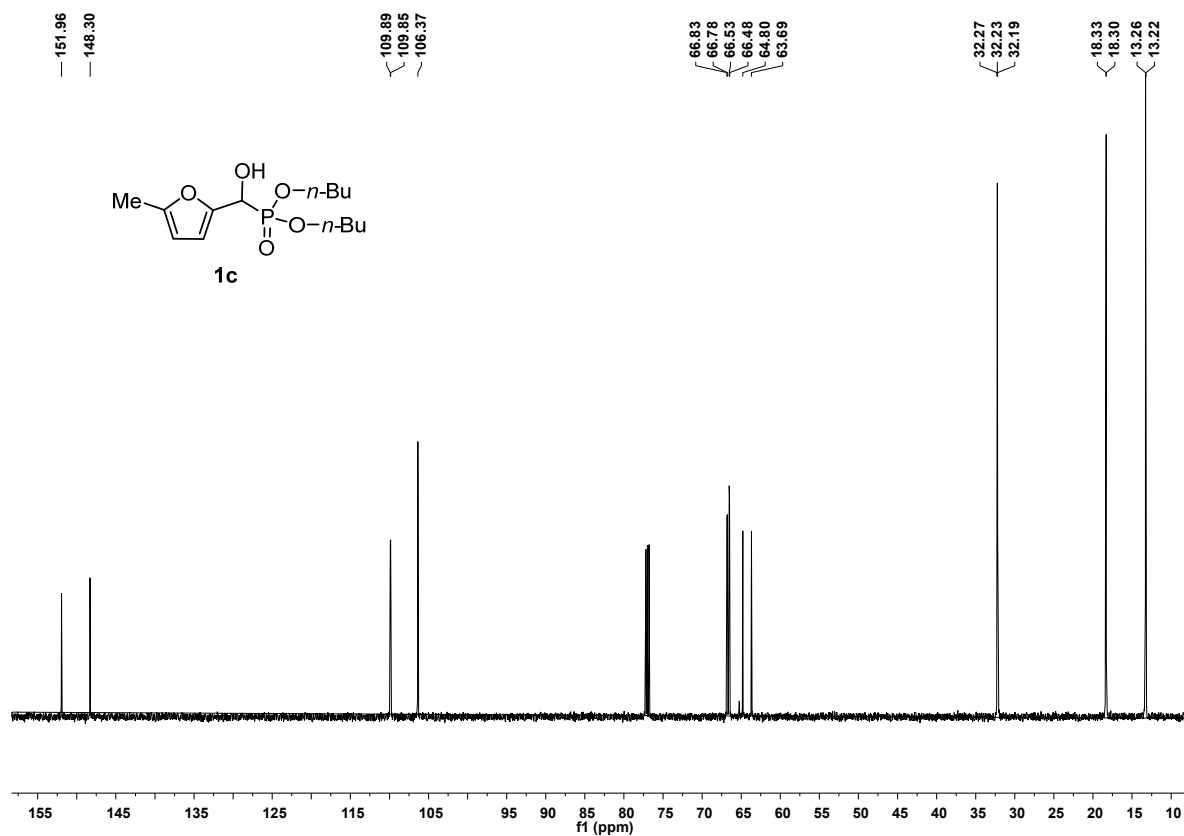

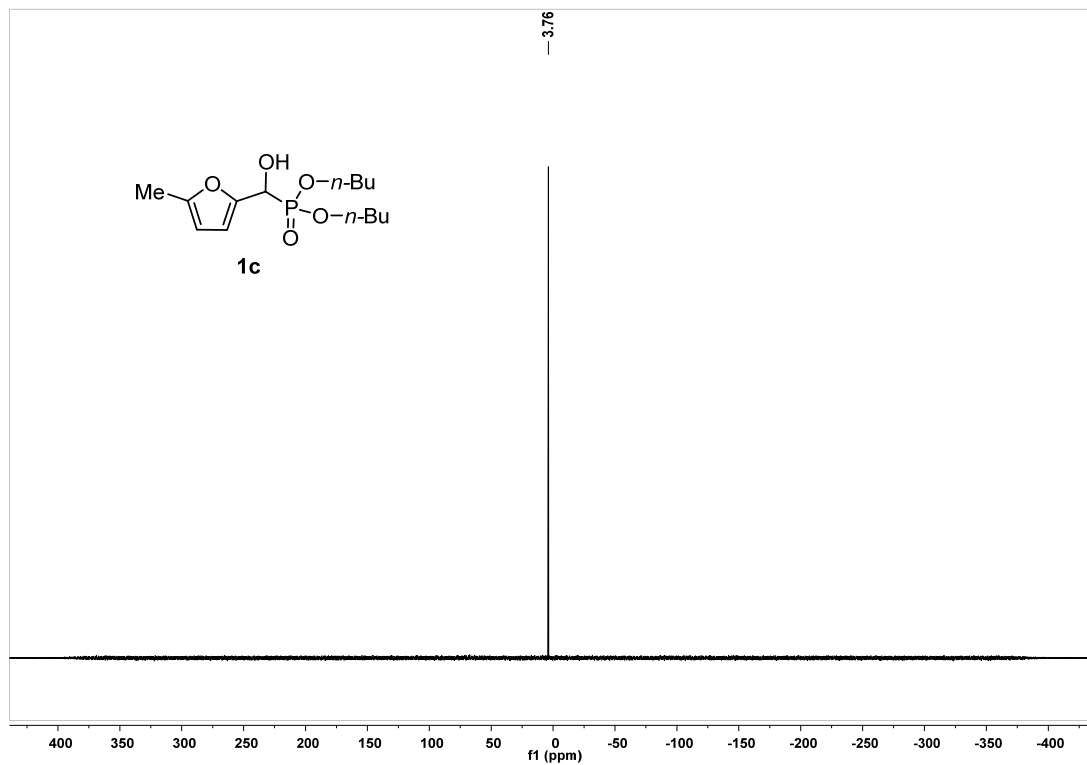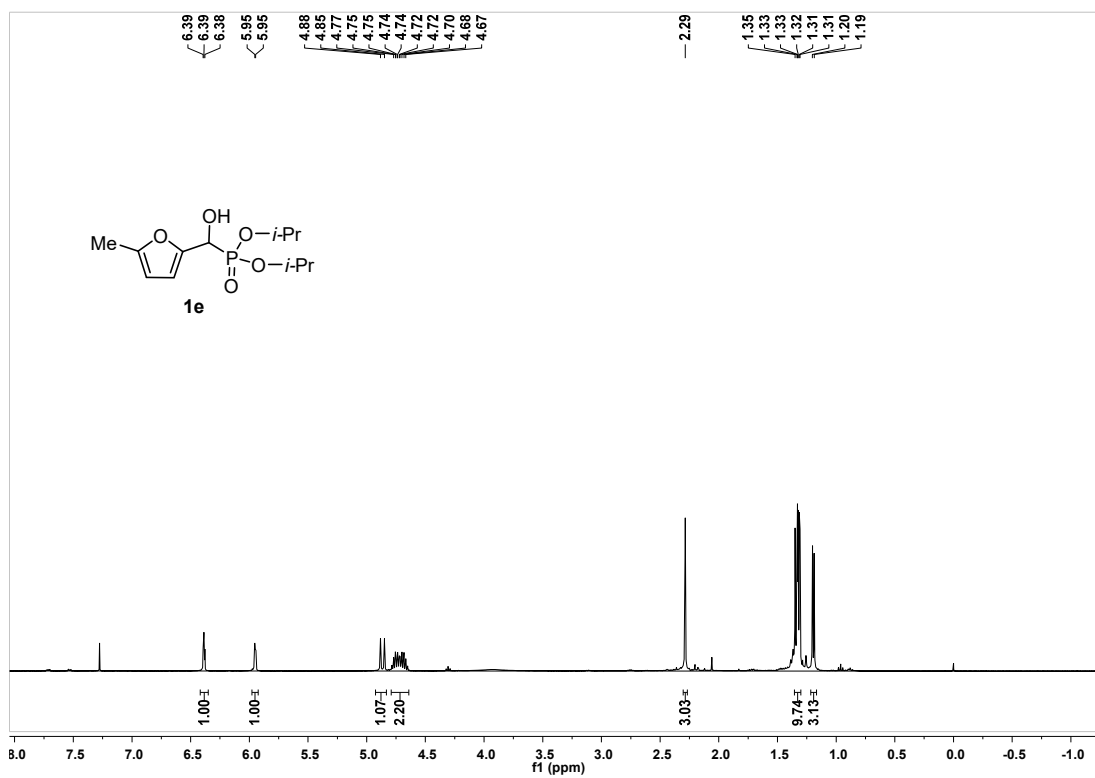

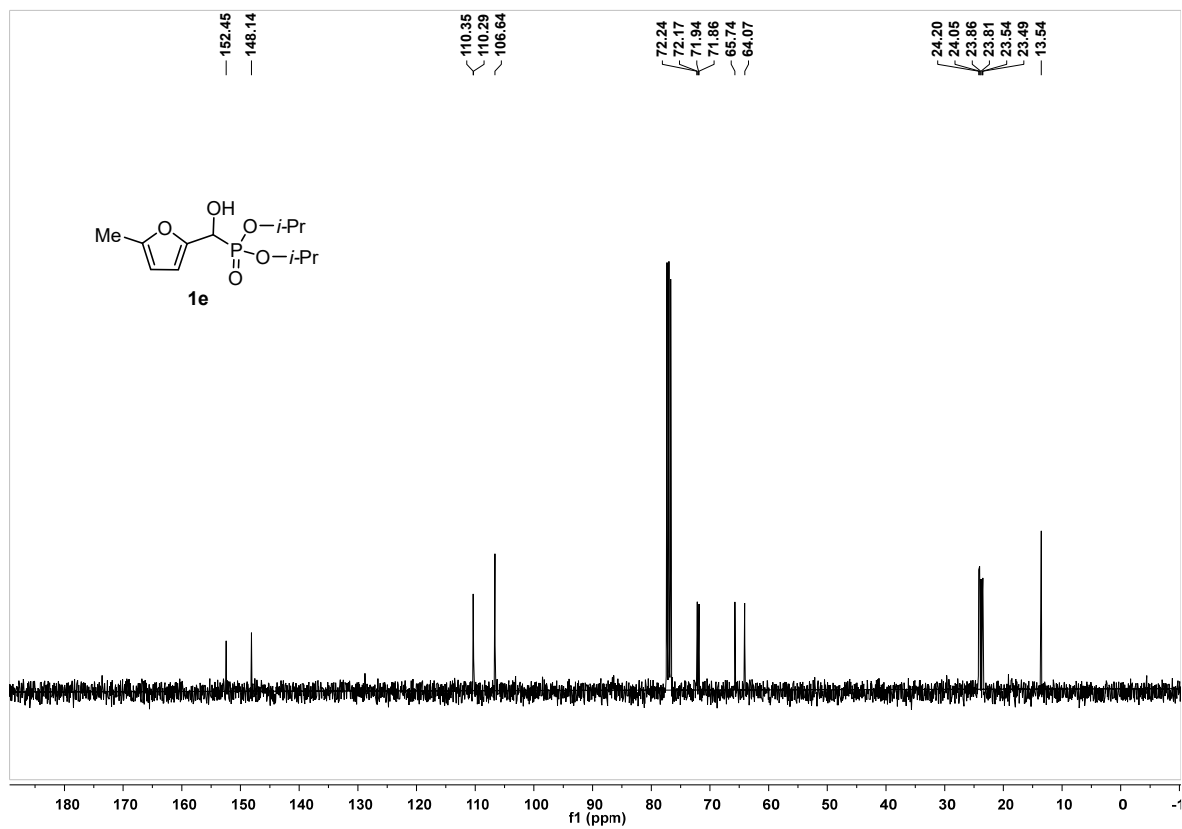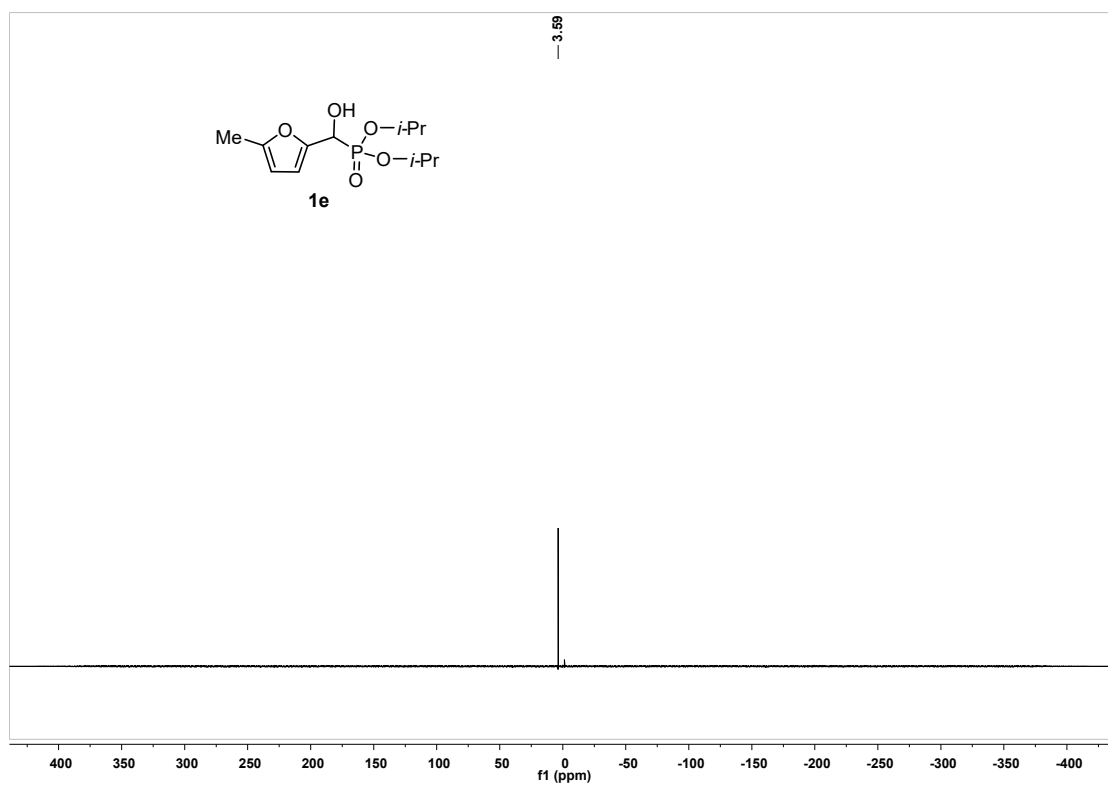

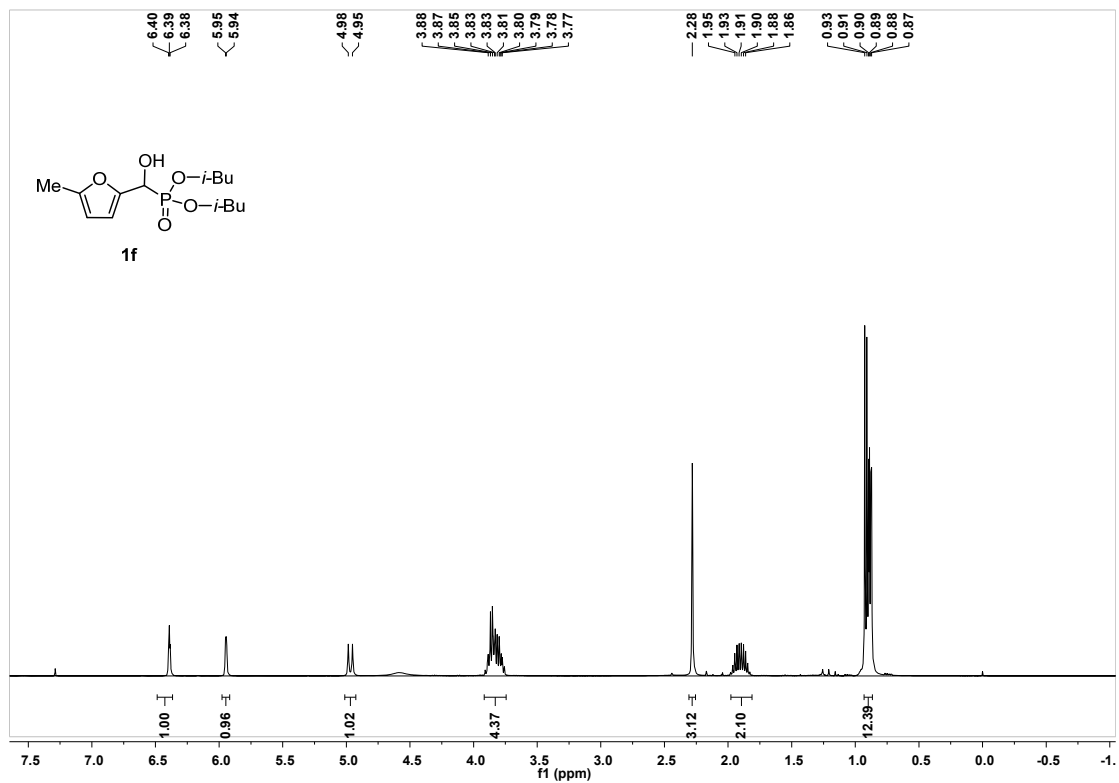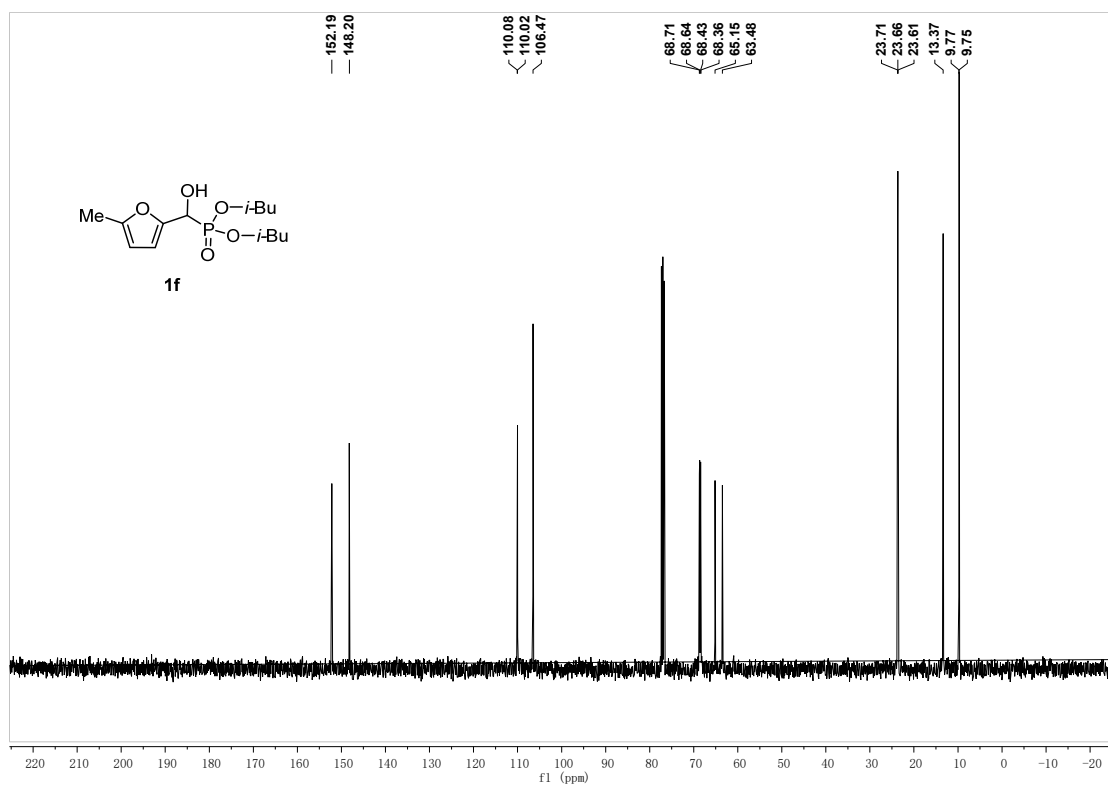

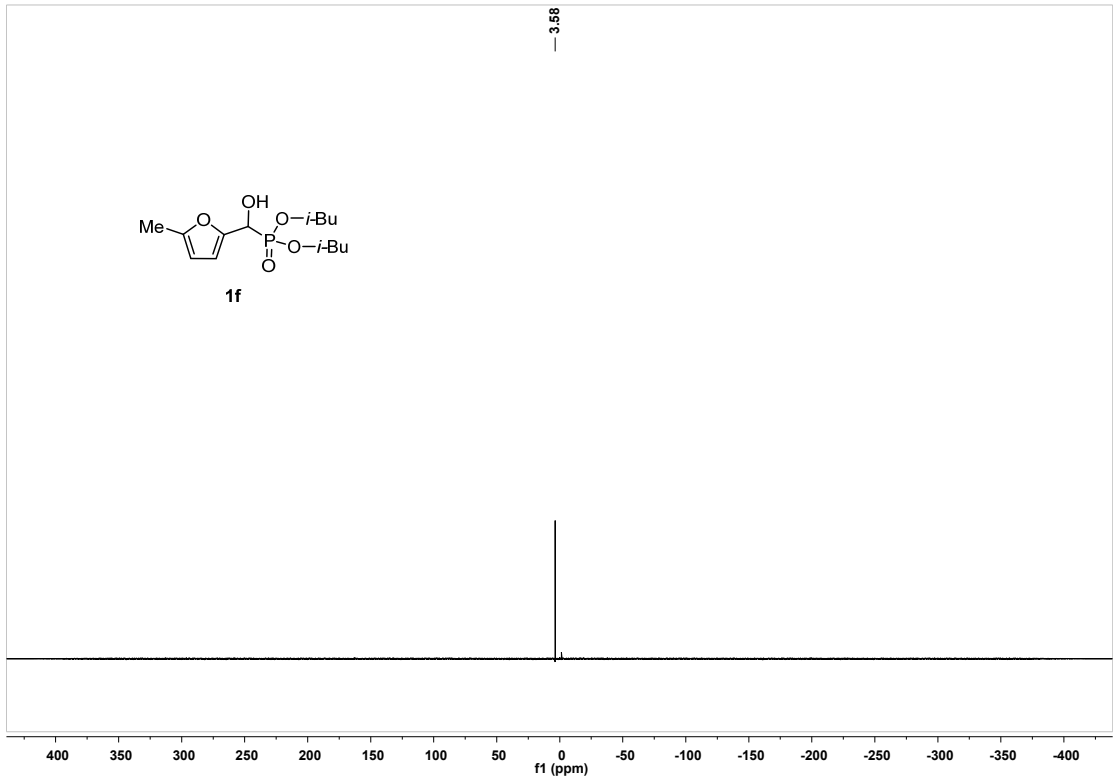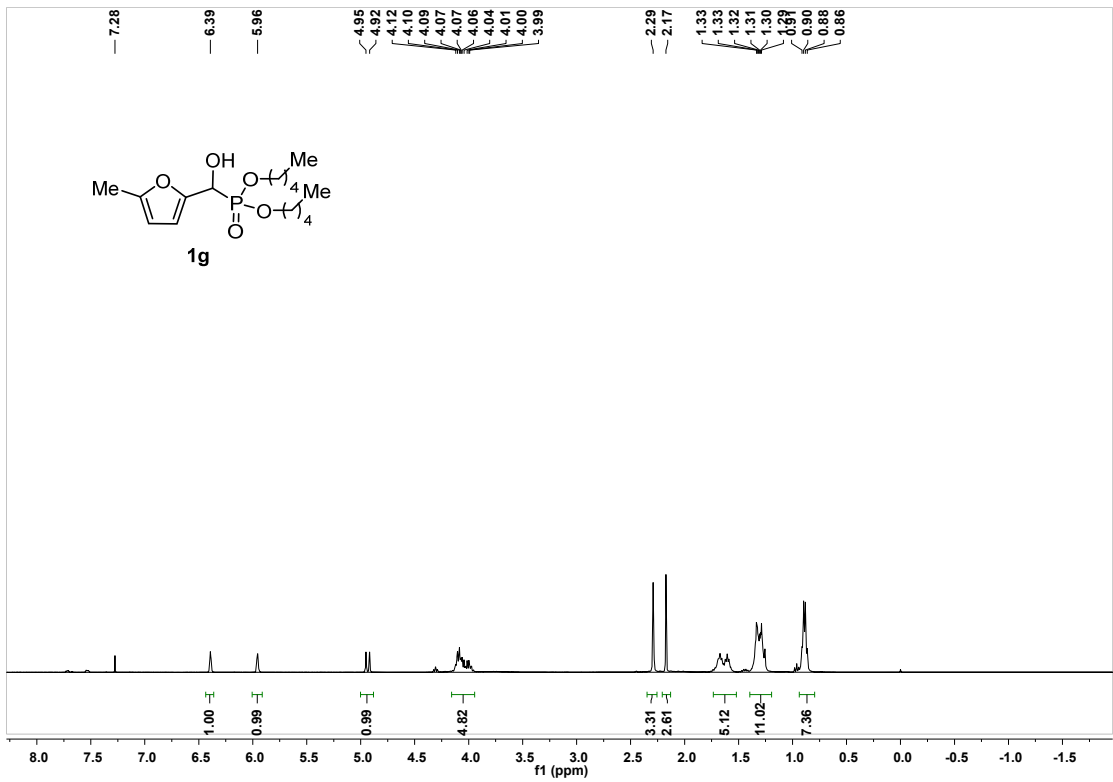

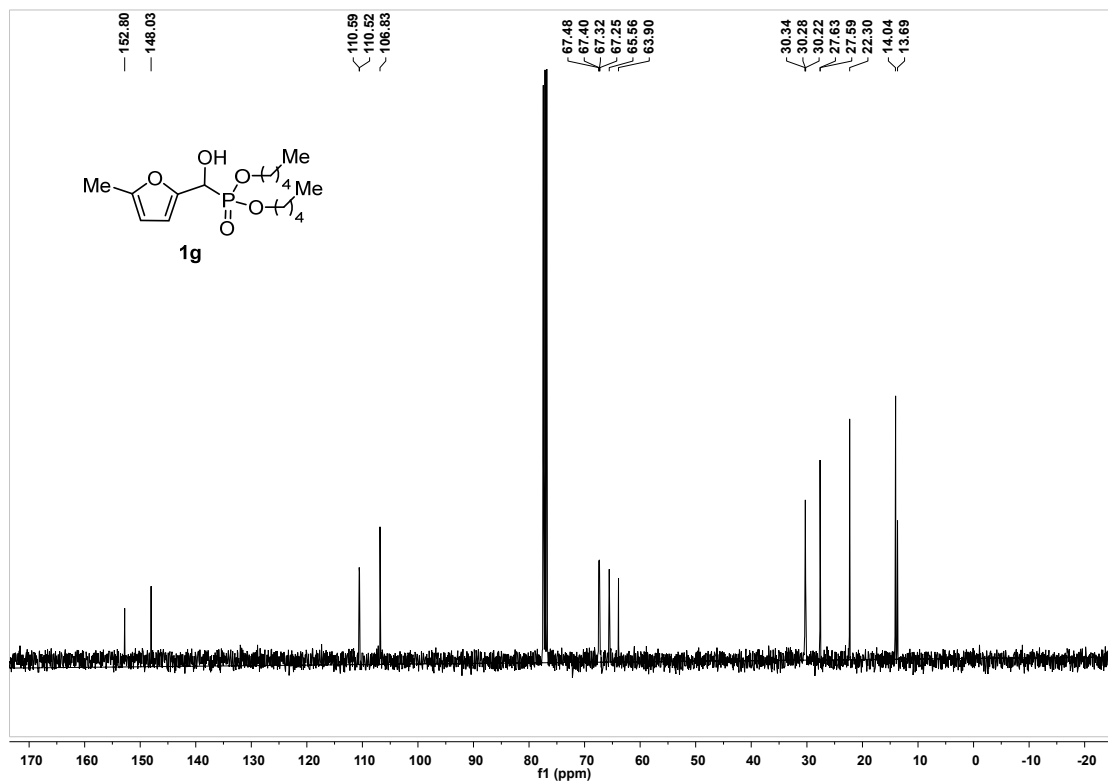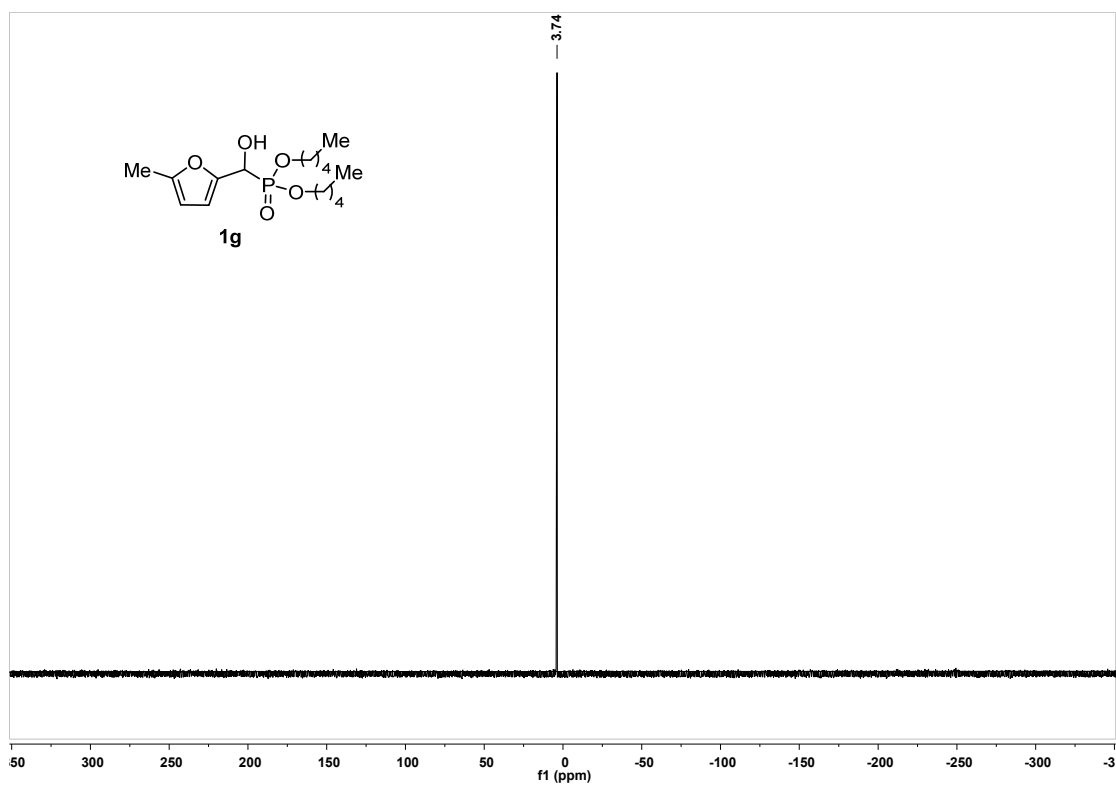



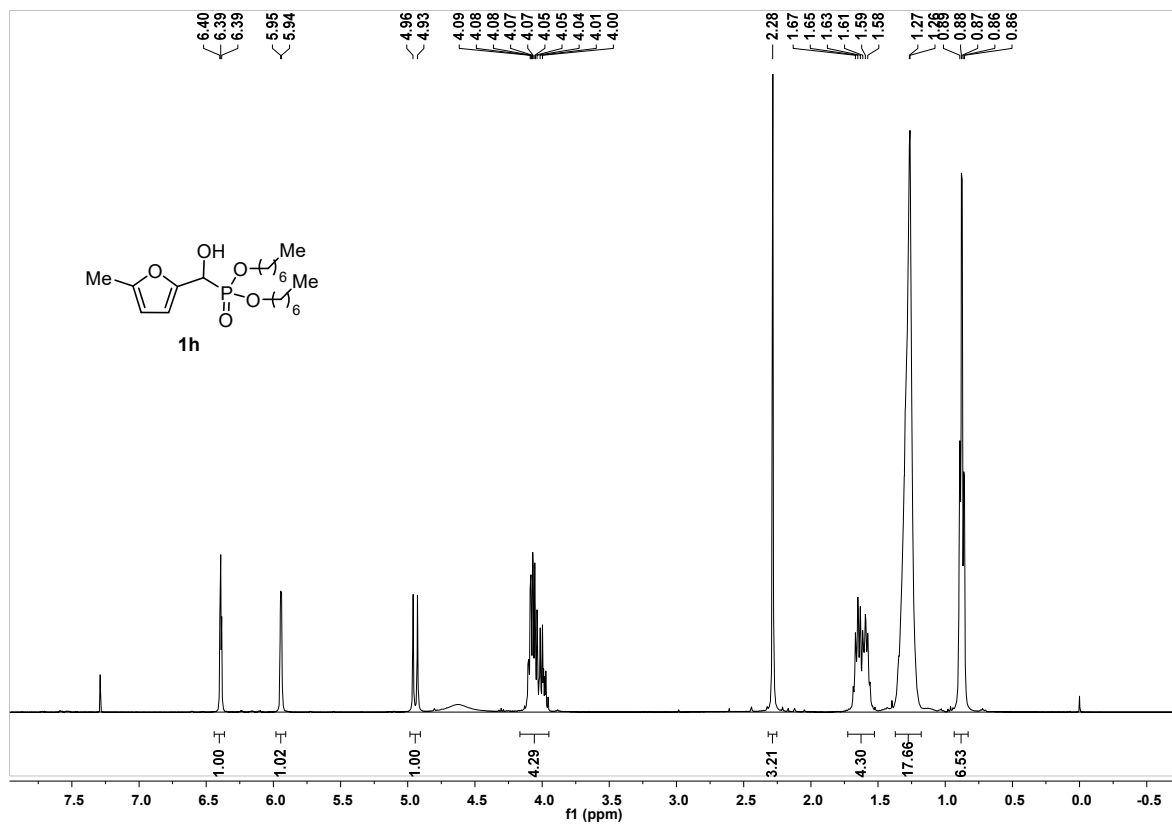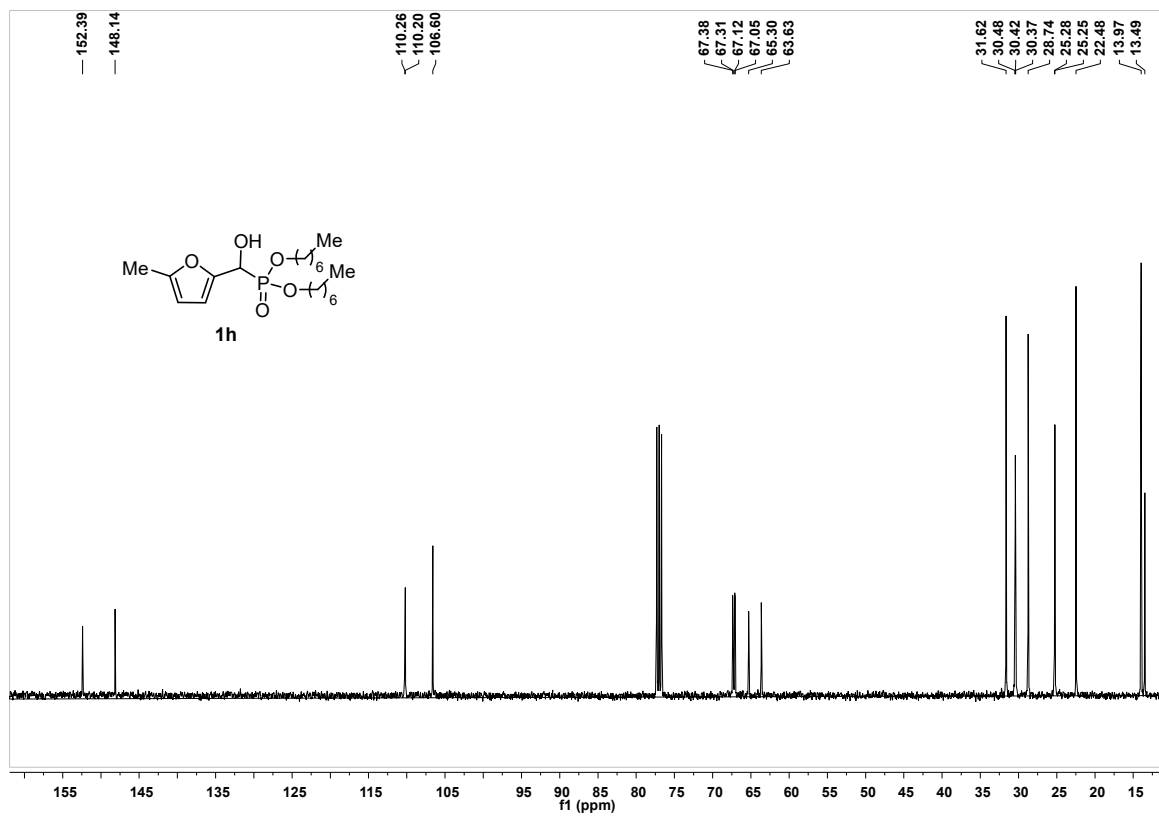

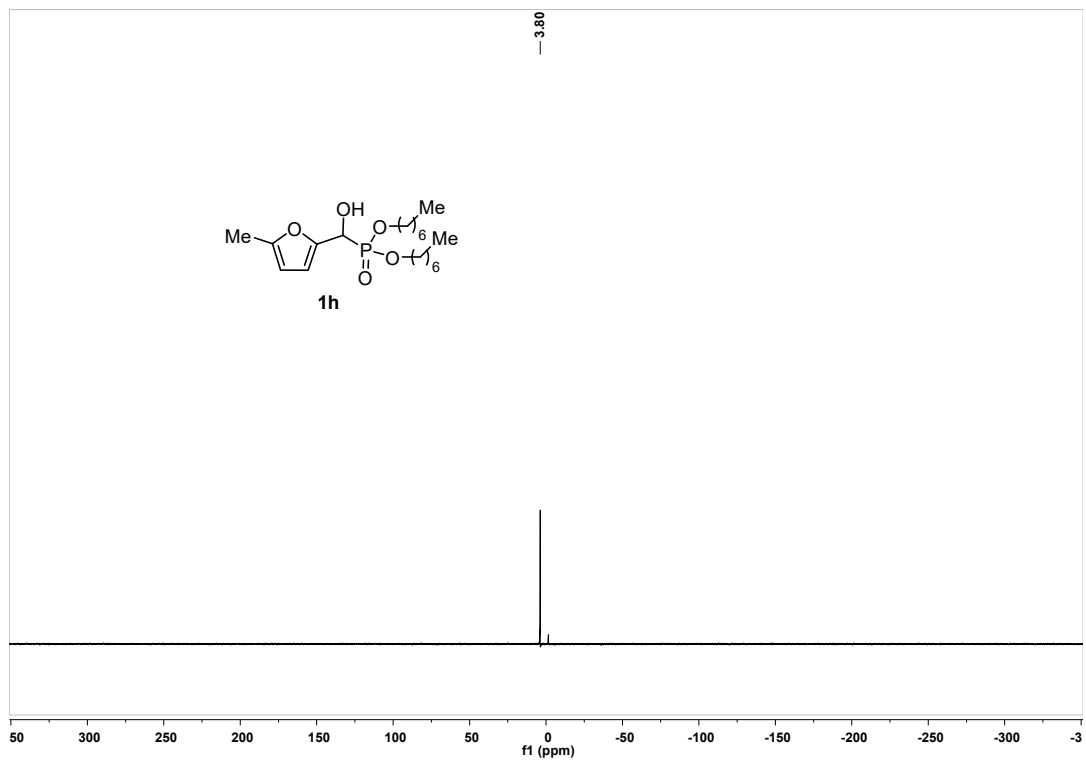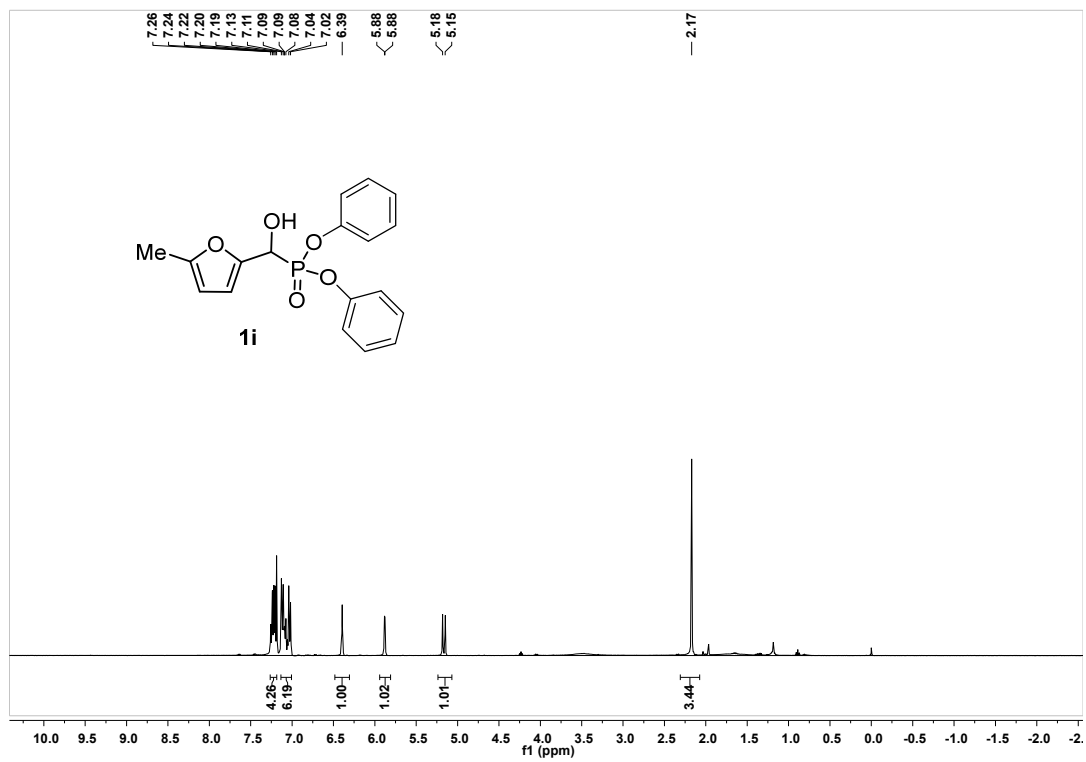

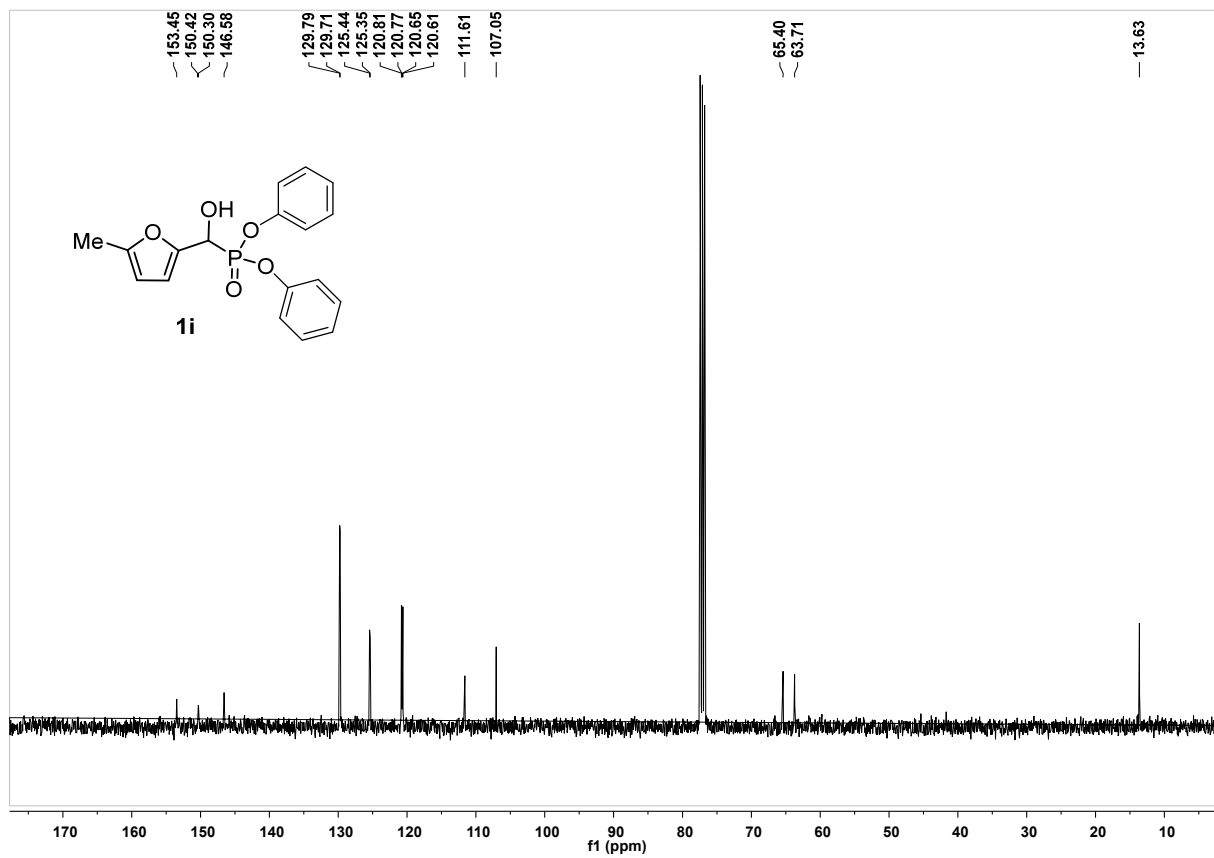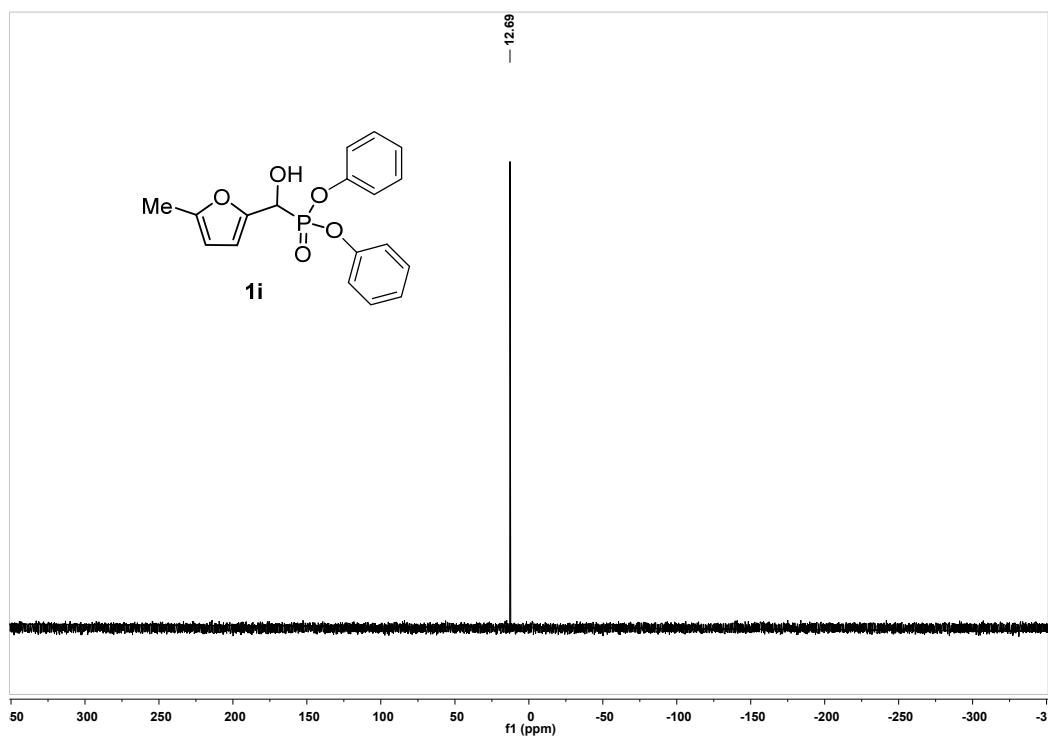

Supplement: d2ob01060g1.pdf [file d2ob01060g1.pdf]
